# Supplementary material for: From In-Person to the Online World: Insights Into Organizing Events in Bioinformatics
Source: Frontiers journal article supplement (doi:10.3389/fbinf.2021.711463), 2021-09-07
Supplement: Data_Sheet_1.PDF [file Data_Sheet_1.PDF]

## Supplementary Material

### 1 Supplementary Figures and Tables

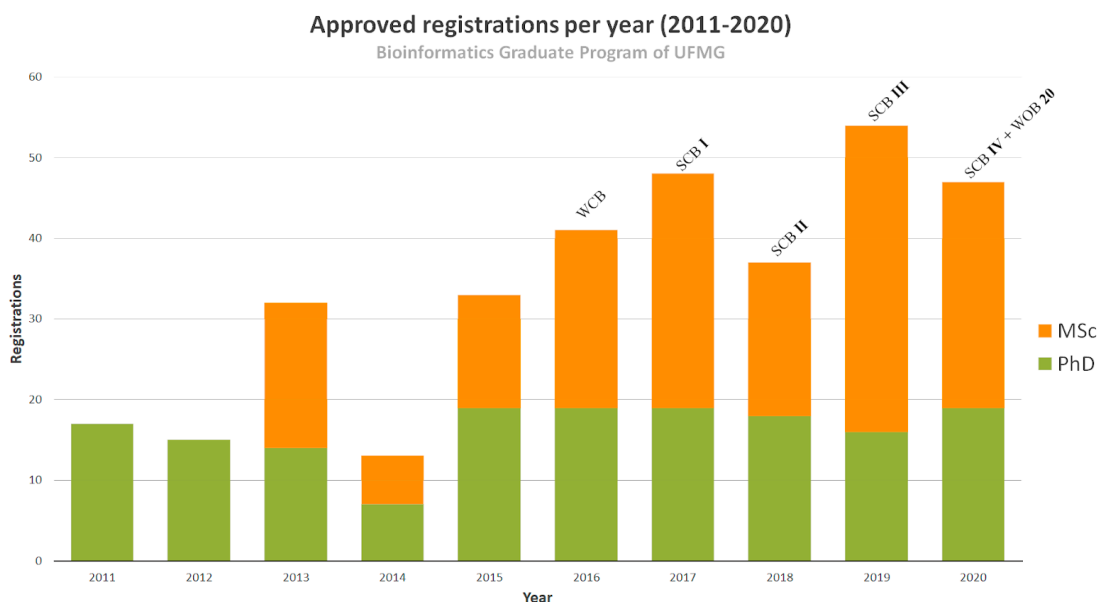

**Supplementary Figure 1.** Approved registrations for the selective process of the MSc and Ph.D. Bioinformatics Graduate Program of UFMG (2011-2020). The Master's degree program was created in 2013. WCB - Winter Course of Bioinformatics 2016. CVBioinfo I-IV indicates the face-to-face Summer Course of Bioinformatics occurred between 2017 and 2020, respectively. WOB20 indicates the Workshop Online on Bioinformatics occurred in November 2020. The list of registrations approved for the master and doctorate program was collected from the Graduate Program official website (available online at <http://www.pgbioinfo.icb.ufmg.br/>) using Python scripts and the libraries BeautifulSoup and requests. Data preprocessing was performed using regular expressions using the Python library re, Sublime Text tool, Google Sheets, and Microsoft Excel tool.

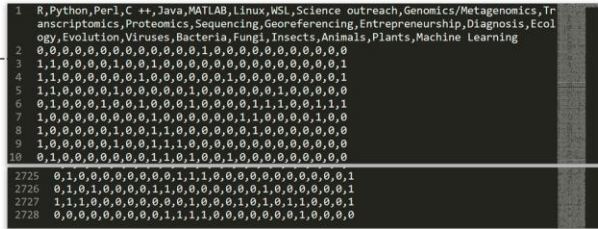

2

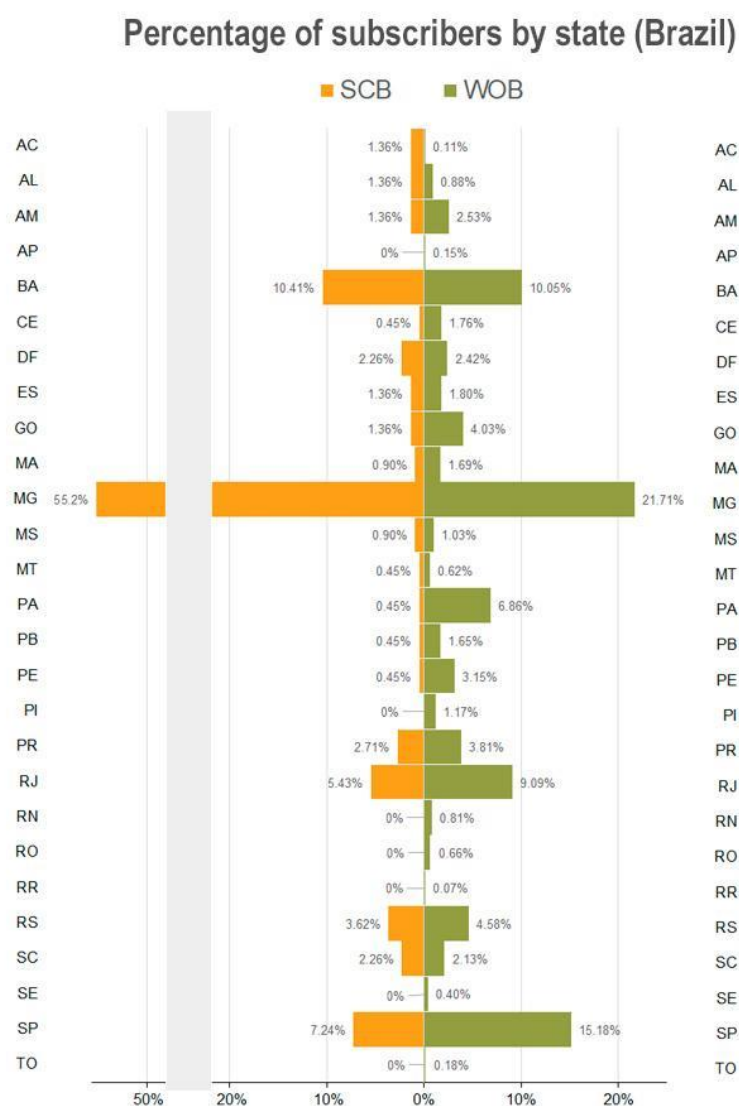

**Supplementary Figure 3.** Comparison between the percentage of registrants in the in-person event CVBioinfo (in the left, colored green, as “SCB”) (n = 221) and in the online event, WOB (in the right, colored orange) (n = 2,727) in each State of Brazil.

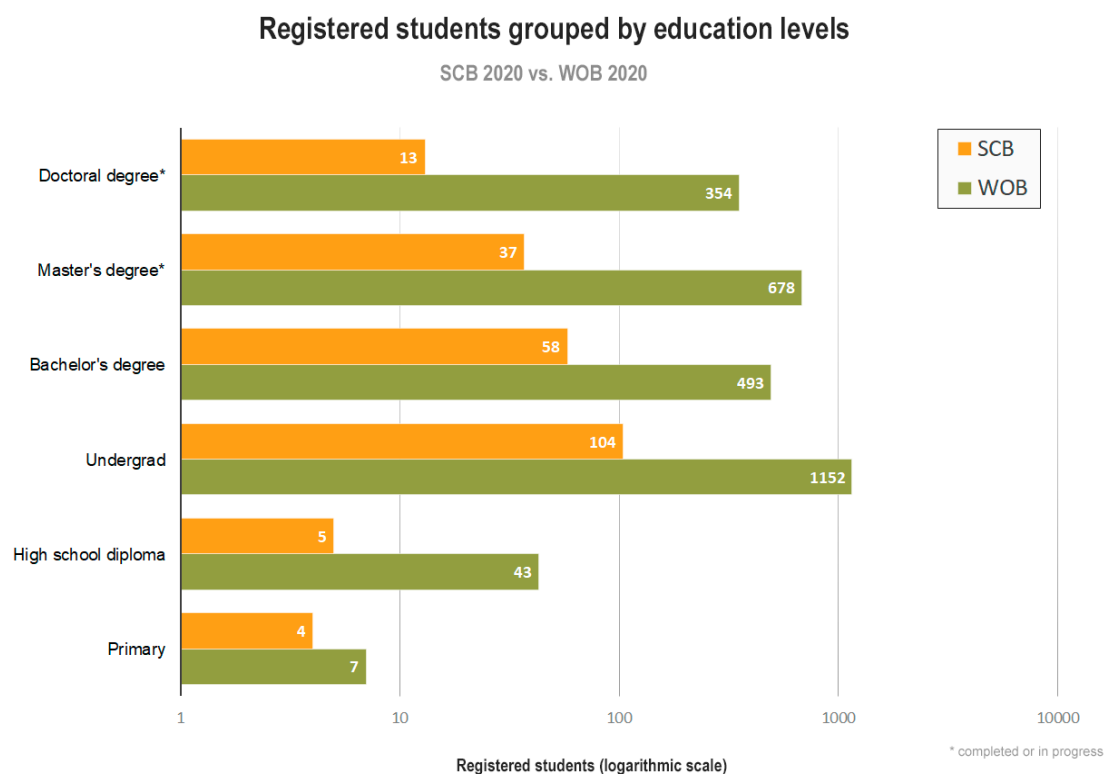

**Supplementary Figure 4.** Distribution of participants grouped by education levels (logarithmic scale). We considered M.Sc. and Ph.D. degrees as completed or in progress (\*), for CVBioinfo (in the left, colored green, as “SCB”) and in the online event, WOB (in the right, colored orange).
