# Supplementary material for: From In-Person to the Online World: Insights Into Organizing Events in Bioinformatics
Source: Front Bioinform. 2021 Sep 7;1:711463. doi: 10.3389/fbinf.2021.711463 (PMC9581051; doi:10.3389/fbinf.2021.711463)
Supplement: Supplementary file 1 [file Table2.XLSX]

## Sheet: supplementary_material_-_Table_
Carimbo de data/hora	Área de formação?	Qual o seu nível atual de formação?	Qual o curso do seu último título de formação?	O quão satisfeito você ficou com o formato online do I WOB20?	Você assistiu à programação completa?	Você assistiu ao evento de modo ao vivo ou posteriormente, através das gravações no YouTube?	O quão satisfeito você ficou com a programação do I WOB20?	Algum comentário, crítica ou sugestão quanto à programação do I WOB20?	Você assistiu à todas às mesas-redondas?	O quão satisfeito você ficou com as mesas-redondas do I WOB20?	Algum comentário, crítica ou sugestão quanto às mesas-redondas do I WOB20?	Você utilizou a programação do I WOB20 disponível na agenda do Google?	O quão útil foi para você a programação do I WOB20 disponível na agenda do Google?	O quão satisfeito você ficou com a organização do I WOB20?	Quais dificuldades vocês enfrentou ao participar do I WOB20? (Pode marcar quantos quiser e também adicionar outras dificuldades na alternativa "outros")	O que você achou da presença de intérpretes de LIBRAS no I WOB20?	O que você achou da inserção de uma campanha beneficente no I WOB20?	Você participou da 1ª Taça das Casas | WOB20?	Você foi selecionado para qual time na 1ª Taça das Casas | WOB20?	O quão satisfeito você ficou com a 1ª Taça das Casas | WOB20?	Algum comentário, crítica ou sugestão quanto à 1ª Taça das Casas | WOB20?	Deixe aqui... os seus elogios:	Deixe aqui... pontos de melhoria para edições futuras:	Deixe aqui... comentários gerais que estejam no seu coração:
2020/12/23 1:48:02 PM GMT-3	Bioquímica	Doutoranda (o)	Mestre	5	Sim	Assisti uma parte da programação ao vivo e parte posteriormente pelos links do YouTube	5	Ótimo	Sim	5		Não	5	5	Problemas com a conexão de internet	Fundamental, manter em futuros eventos	Fundamental, manter em futuros eventos	Não	Não participei :(	5
2020/12/23 2:26:07 PM GMT-3	Ciências biológicas	Doutoranda (o)	Bioinformática	5	Sim	Assisti uma parte da programação ao vivo e parte posteriormente pelos links do YouTube	5		Não	5		Sim	5	5	Dificuldade em acessar os links do YouTube	Fundamental, manter em futuros eventos	Fundamental, manter em futuros eventos	Não	Não participei :(	5
2020/12/23 2:26:41 PM GMT-3	Ciências biológicas	Mestranda (o)	Ciências Biológicas Modalidade Genética	5	Sim	Assisti a programação completa pelas gravações no YouTube	4		Sim	4		Sim	4	4	Problemas com a conexão de internet;Dificuldade de me concentrar durante o evento	Fundamental, manter em futuros eventos	Fundamental, manter em futuros eventos	Não	Não participei :(	4
2020/12/23 2:26:46 PM GMT-3	Ciências da computação	Mestranda (o)	Especialização	5	Sim	Assisti a programação completa ao vivo	5		Sim	5		Sim	5	5	Dificuldade de me concentrar durante o evento	Fundamental, manter em futuros eventos	Fundamental, manter em futuros eventos	Não	Não participei :(	5
2020/12/23 2:26:50 PM GMT-3	Ciências biológicas	Estudante de graduação	Graduação	5	Sim	Assisti a programação completa ao vivo	5		Sim	5		Sim	5	5	Os horários	Fundamental, manter em futuros eventos	Fundamental, manter em futuros eventos	Não	Não participei :(	5
2020/12/23 2:26:57 PM GMT-3	Ciências biológicas	Doutoranda (o)	Mestrado em Biotecnologia	5	Sim	Assisti a programação completa ao vivo	5		Sim	5		Sim	5	5	Problemas com a conexão de internet	Fundamental, manter em futuros eventos	Fundamental, manter em futuros eventos	Não	Não participei :(	5		Excelente evento. Parabéns aos organizadores.	Sinceramente, não tenho sugestões. Achei o evento muito bom.
2020/12/23 2:27:11 PM GMT-3	Ciências da computação	Doutora/Doutor	Doutor em Genética e Biologia Molecular	5	Sim	Assisti a programação completa ao vivo	5	O certificado demorou heheheh	Sim	5	Apenas continuem, foi bom demais.	Sim	5	5	Só a demora do certificado	Fundamental, manter em futuros eventos	Fundamental, manter em futuros eventos	Não	Não participei :(	5		Foi muito bom. Tudo.	Agilizar os certificados.	Parabéns !
2020/12/23 2:27:11 PM GMT-3	Ciências biológicas	Estudante de graduação	Ciências Biológicas	5	Sim	Assisti uma parte da programação ao vivo e parte posteriormente pelos links do YouTube	5		Sim	5		Sim	5	5	Dificuldade de me concentrar durante o evento	Fundamental, manter em futuros eventos	Fundamental, manter em futuros eventos	Não	Não participei :(	5		Muito legal e interessante	Abordar biologia de sistemas	Nenhum
2020/12/23 2:27:16 PM GMT-3	Ciências biológicas	Mestranda (o)	Biomedicina	5	Sim	Assisti a programação completa pelas gravações no YouTube	5		Sim	5		Não	2	5	Dificuldade de me concentrar durante o evento	Fundamental, manter em futuros eventos	Fundamental, manter em futuros eventos	Sim	#TeamCapivara	5				Vocês são sensacionais! Participei da Escola de verão em janeiro e amei demais. O I WOB não foi diferente. Fico encantada com a entrega de vocês nos eventos. Parabéns!
2020/12/23 2:27:19 PM GMT-3	Interdisciplinar	Estudante de graduação	Não tenho	5	Não	Assisti uma parte da programação ao vivo e parte posteriormente pelos links do YouTube	5		Não	5		Sim	5	5	Problemas com a conexão de internet	Fundamental, manter em futuros eventos	Fundamental, manter em futuros eventos	Não	Não participei :(	5
2020/12/23 2:27:23 PM GMT-3	Ciências biológicas	Estudante de graduação	biotecnologia	3	Sim	Assisti uma parte da programação ao vivo e parte posteriormente pelos links do YouTube	4		Sim	3		Não	1	1	Dificuldade de me concentrar durante o evento;Preenchimento das listas de presença	Fundamental, manter em futuros eventos	Fundamental, manter em futuros eventos	Não	Não participei :(	3
2020/12/23 2:27:29 PM GMT-3	Ciências biológicas	Estudante de graduação	Licenciatura plena em Ciências Biologicas	5	Sim	Assisti a programação completa ao vivo	5		Sim	5		Sim	5	5	Problemas com a conexão de internet	Fundamental, manter em futuros eventos	Fundamental, manter em futuros eventos	Sim	#TeamJaguatirica	4
2020/12/23 2:27:45 PM GMT-3	Ciências biológicas	Estudante de graduação	Biotecnologia	5	Sim	Assisti a programação completa pelas gravações no YouTube	5		Sim	5		Não	3	5	Dificuldade em realizar doações para a campanha beneficente "Projeto X"	Fundamental, manter em futuros eventos	Fundamental, manter em futuros eventos	Não	Não participei :(	3		tudo muito bom e achei o maior diferencial a presença de interprete de LIBRAS!
2020/12/23 2:27:50 PM GMT-3	Ciências biológicas	Estudante de graduação	Ensino Médio	5	Sim	Assisti a programação completa ao vivo	5		Sim	5		Sim	5	5	Nenhuma	Fundamental, manter em futuros eventos	Fundamental, manter em futuros eventos	Sim	#TeamJaguatirica	5
2020/12/23 2:28:06 PM GMT-3	Ciências biológicas	Doutora/Doutor	CIENCIAS BIOLOGICAS	5	Sim	Assisti a programação completa ao vivo	5	NINGUNA	Sim	5	NINGUNA	Sim	5	5	NINGUNA	Fundamental, manter em futuros eventos	Fundamental, manter em futuros eventos	Não	Não participei :(	3	NINGUNA
2020/12/23 2:28:08 PM GMT-3	Medicina	Estudante de graduação	Técnico em Edificações	5	Sim	Assisti uma parte da programação ao vivo e parte posteriormente pelos links do YouTube	5		Sim	4		Sim	5	5	Dificuldade de me concentrar durante o evento	Fundamental, manter em futuros eventos	Fundamental, manter em futuros eventos	Não	Não participei :(	5
2020/12/23 2:28:33 PM GMT-3	Ciências biológicas	Estudante de graduação	Biomedicina	5	Sim	Assisti a programação completa ao vivo	5		Sim	5		Sim	5	5	Dificuldade de me concentrar durante o evento	Fundamental, manter em futuros eventos	Fundamental, manter em futuros eventos	Não	Não participei :(	5
2020/12/23 2:28:42 PM GMT-3	Ciências da computação	Mestra/Mestre	Ciência e Tecnologia Ambiental	4	Sim	Assisti uma parte da programação ao vivo e parte posteriormente pelos links do YouTube	4	Poderiam ter focado parte mais considerável sobre programação.	Sim	5		Sim	5	4	não tive dificuldades	Fundamental, manter em futuros eventos	Fundamental, manter em futuros eventos	Não	Não participei :(	4
2020/12/23 2:29:17 PM GMT-3	Ciências biológicas	Estudante de graduação	Biomedicina	5	Não	Não assisti à programação completa, apenas assisti o que pude ver ao vivo	5		Sim	5		Sim	5	5	Problemas com a conexão de internet;Dificuldade de me concentrar durante o evento	Fundamental, manter em futuros eventos	Fundamental, manter em futuros eventos	Não	Não participei :(	3
2020/12/23 2:29:35 PM GMT-3	Ciências biológicas	Estudante de graduação	Biomedicina	5	Sim	Assisti uma parte da programação ao vivo e parte posteriormente pelos links do YouTube	5		Não	5		Sim	5	5	Acesso aos e-mails com notícias do I WOB20	Fundamental, manter em futuros eventos	Fundamental, manter em futuros eventos	Não	Não participei :(	5
2020/12/23 2:29:49 PM GMT-3	Interdisciplinar	Estudante de graduação	Biomedicina	5	Sim	Assisti uma parte da programação ao vivo e parte posteriormente pelos links do YouTube	5		Sim	5		Sim	5	5	Problemas com a conexão de internet;Dificuldade de me concentrar durante o evento;Preenchimento das listas de presença	Fundamental, manter em futuros eventos	Fundamental, manter em futuros eventos	Sim	#TeamJacaré	5	Adorei a dinâmica	Evento muito bem organizado e distribuição de temas muito boa. Chamem o Miguelito para o próximo, o momento de descontração foi muito bom.
2020/12/23 2:29:49 PM GMT-3	Ciências da computação	Estudante de graduação	Bacharelado em Ciências de Computação	5	Sim	Assisti uma parte da programação ao vivo e parte posteriormente pelos links do YouTube	5		Não	5		Não	1	5	Problemas com a conexão de internet	Fundamental, manter em futuros eventos	Fundamental, manter em futuros eventos	Não	Não participei :(	3
2020/12/23 2:29:53 PM GMT-3	Ciências biológicas	Estudante de graduação	Biotecnologia	5	Sim	Assisti a programação completa ao vivo	5		Sim	5		Sim	5	5	Problemas com a conexão de internet	Fundamental, manter em futuros eventos	Fundamental, manter em futuros eventos	Não	Não participei :(	3
2020/12/23 2:30:00 PM GMT-3	Ciências biológicas	Graduada/Graduado	Ciências Biológicas	5	Sim	Assisti a programação completa ao vivo	5		Sim	5		Não	5	5	Problemas com a conexão de internet	Fundamental, manter em futuros eventos	Fundamental, manter em futuros eventos	Não	Não participei :(	5
2020/12/23 2:30:09 PM GMT-3	Ciências biológicas	Doutoranda (o)	Mestra em Recursos Genéticos Vegetais	5	Sim	Assisti a programação completa ao vivo	5	Excelente curso	Sim	5	Nada a dizer, amei.	Sim	5	5	Nao tive dificuldade em nada	Fundamental, manter em futuros eventos	Fundamental, manter em futuros eventos	Não	Não participei :(	1	Sem sugestões	Excelente curso, temas atuais e ministrados por docentes competentes.	Sem defeitos	Continuem com esse trabalho fantástico. A ciência agradece!
2020/12/23 2:30:17 PM GMT-3	Ciências biológicas	Doutoranda (o)	Ciências (Microbiologia)	4	Sim	Assisti uma parte da programação ao vivo e parte posteriormente pelos links do YouTube	5		Não	5		Sim	5	5	Preenchimento das listas de presença	Fundamental, manter em futuros eventos	Fundamental, manter em futuros eventos	Não	Não participei :(	3		A iniciativa de manter o curso de forma remota nesse período pandêmico foi excelente.
2020/12/23 2:30:32 PM GMT-3	Interdisciplinar	Mestranda (o)	Informática Biomédica	5	Sim	Assisti a programação completa ao vivo	5		Não	5		Não	3	5	Nenhuma dificuldade	Fundamental, manter em futuros eventos	Fundamental, manter em futuros eventos	Sim	#TeamJacaré	4
2020/12/23 2:30:56 PM GMT-3	Ciências biológicas	Estudante de graduação	--	5	Sim	Assisti uma parte da programação ao vivo e parte posteriormente pelos links do YouTube	5		Sim	5		Não	1	5	Preenchimento das listas de presença	Fundamental, manter em futuros eventos	Fundamental, manter em futuros eventos	Não	Não participei :(	3
2020/12/23 2:31:27 PM GMT-3	Ciências biológicas	Doutoranda (o)	Bioinformática	5	Sim	Assisti uma parte da programação ao vivo e parte posteriormente pelos links do YouTube	5		Não	5		Sim	5	5	Dificuldade em acessar os links do YouTube	Fundamental, manter em futuros eventos	Fundamental, manter em futuros eventos	Não	Não participei :(	5
2020/12/23 2:31:37 PM GMT-3	Interdisciplinar	Doutora/Doutor	Biossistemas	5	Sim	Assisti uma parte da programação ao vivo e parte posteriormente pelos links do YouTube	5		Sim	5		Sim	5	5	Problemas com a conexão de internet;Preenchimento das listas de presença	Fundamental, manter em futuros eventos	Fundamental, manter em futuros eventos	Sim	#TeamCapivara	5
2020/12/23 2:32:03 PM GMT-3	Ciências biológicas	Estudante de graduação	Ensino médio	4	Sim	Assisti a programação completa ao vivo	4	Nenhuma	Não	3	Não	Sim	4	4	Acesso aos e-mails com notícias do I WOB20	Fundamental, manter em futuros eventos	Fundamental, manter em futuros eventos	Não	Não participei :(	2	Nenhum	Foi muito bom
2020/12/23 2:32:06 PM GMT-3	Ciências da computação	Mestranda (o)	Mestrado em Ciência da Computação	5	Sim	Assisti uma parte da programação ao vivo e parte posteriormente pelos links do YouTube	5		Sim	5		Sim	5	5	Problemas com a conexão de internet	Fundamental, manter em futuros eventos	Fundamental, manter em futuros eventos	Não	Não participei :(	3		Foi tudo ótimo. É o segundo evento que vocês organizam que eu participo e vocês sempre arrasam		Quero muito fazer parte do programa de vocês
2020/12/23 2:32:25 PM GMT-3	Ciências biológicas	Doutora/Doutor	Ciências Veterinárias	4	Sim	Assisti a programação completa ao vivo	4		Sim	4		Não	3	4	Problemas com a conexão de internet	Fundamental, manter em futuros eventos	Fundamental, manter em futuros eventos	Sim	#TeamJaguatirica	5		Foi ótimo ainda mais nesse tempo de atividades remotas	Coisas práticas. Mini cursos!
2020/12/23 2:32:26 PM GMT-3	Ciências biológicas	Doutoranda (o)	Ciências médicas	4	Não	Assisti uma parte da programação ao vivo e parte posteriormente pelos links do YouTube	5		Não	4		Sim	3	5	Problemas com a conexão de internet;Dificuldade de me concentrar durante o evento	Fundamental, manter em futuros eventos	Fundamental, manter em futuros eventos	Não	Não participei :(	3
2020/12/23 2:32:46 PM GMT-3	Ciências biológicas	Doutoranda (o)	Ciências Médicas	4	Sim	Assisti a programação completa ao vivo	4		Não	3		Não	3	4	Nenhuma	Fundamental, manter em futuros eventos	Fundamental, manter em futuros eventos	Não	#TeamJaguatirica	3
2020/12/23 2:33:00 PM GMT-3	Ciências biológicas	Doutoranda (o)	Farmácia	5	Não	Assisti uma parte da programação ao vivo e parte posteriormente pelos links do YouTube	5		Sim	5		Sim	5	5	Problemas com a conexão de internet;Preenchimento das listas de presença	Fundamental, manter em futuros eventos	Fundamental, manter em futuros eventos	Não	Não participei :(	5
2020/12/23 2:33:21 PM GMT-3	Ciências biológicas	Mestranda (o)	Bacharel	5	Sim	Assisti a programação completa ao vivo	5		Sim	5		Sim	5	5	Preenchimento das listas de presença	Fundamental, manter em futuros eventos	Fundamental, manter em futuros eventos	Não	Não participei :(	5		Parabéns pela iniciativa, as palestras foram maravilhosas e o projeto que vocês desenvolvem é inspirador demais. Continuem assim, mal posso esperar pelo próximo evento!!!!
2020/12/23 2:34:01 PM GMT-3	Ciências biológicas	Estudante de graduação	biologia	5	Sim	Assisti a programação completa ao vivo	5		Sim	5		Não	5	5	Problemas com a conexão de internet	Fundamental, manter em futuros eventos	Foi bom, mas evitar em futuros eventos	Sim	#TeamJaguatirica	2	Menos gente do python pls
2020/12/23 2:34:07 PM GMT-3	Ciências biológicas	Graduada/Graduado	Ciências Biológicas	5	Sim	Assisti a programação completa ao vivo	5		Sim	5		Não	3	5	Problemas com a conexão de internet	Fundamental, manter em futuros eventos	Fundamental, manter em futuros eventos	Não	Não participei :(	3		Foi um ótimo evento, espero outros no futuro.
2020/12/23 2:34:24 PM GMT-3	Ciências biológicas	Estudante de graduação	Ensino médio	5	Sim	Assisti uma parte da programação ao vivo e parte posteriormente pelos links do YouTube	5		Sim	5		Não	3	5	Dificuldade de me concentrar durante o evento	Fundamental, manter em futuros eventos	Fundamental, manter em futuros eventos	Não	Não participei :(	3
2020/12/23 2:34:31 PM GMT-3	Ciências biológicas	Estudante de graduação	Biomedicina	4	Sim	Assisti a programação completa ao vivo	5		Sim	5		Não	2	5	Problemas com a conexão de internet;Dificuldade de me concentrar durante o evento	Fundamental, manter em futuros eventos	Fundamental, manter em futuros eventos	Não	Não participei :(	3		Parabéns a toda equipe pela organização do evento. A programação foi perfeita!		Tenho descoberto na bioinformática uma grande ferramenta e quero continuar estudando o tema mais a fundo. Espero que em breve possa participar de um curso presencial no campus da UFGM.
2020/12/23 2:34:31 PM GMT-3	Ciências biológicas	Estudante de graduação	Ciências Biológicas: Microbiologia e Imunologia	5	Sim	Assisti a programação completa ao vivo	4		Não	3		Sim	5	5	Problemas com a conexão de internet;Preenchimento das listas de presença	Fundamental, manter em futuros eventos	Fundamental, manter em futuros eventos	Não	Não participei :(	2				Eu amei o workshop, me fez ter ainda mais vontade de aprender sobre esse universo. O fato de ter sido online também foi muito bom uma vez que é mais prático para que pessoas de outros estados participem, como é o meu caso. Toda a comissão organizadora está de parabéns!
2020/12/23 2:34:36 PM GMT-3	Ciências biológicas	Mestranda (o)	Ciências Biológicas	5	Sim	Assisti a programação completa ao vivo	5		Sim	5		Não	3	5	Problemas com a conexão de internet	Fundamental, manter em futuros eventos	Fundamental, manter em futuros eventos	Não	Não participei :(	3
2020/12/23 2:35:08 PM GMT-3	Ciências biológicas	Estudante de graduação	Farmácia	5	Sim	Assisti a programação completa ao vivo	5		Sim	4		Sim	5	5	Dificuldade de me concentrar durante o evento	Fundamental, manter em futuros eventos	Fundamental, manter em futuros eventos	Não	Não participei :(	4
2020/12/23 2:35:16 PM GMT-3	Interdisciplinar	Estudante de graduação	Ensino médio	4	Não	Assisti uma parte da programação ao vivo e parte posteriormente pelos links do YouTube	4		Não	5		Não	5	4	Problemas com a conexão de internet;Dificuldade de me concentrar durante o evento;Preenchimento das listas de presença	Fundamental, manter em futuros eventos	Fundamental, manter em futuros eventos	Não	Não participei :(	1
2020/12/23 2:35:29 PM GMT-3	Biomedicina	Estudante de graduação	Biomédica	5	Sim	Assisti uma parte da programação ao vivo e parte posteriormente pelos links do YouTube	5		Sim	5		Não	1	5	Problemas com a conexão de internet	Fundamental, manter em futuros eventos	Fundamental, manter em futuros eventos	Não	Não participei :(	1
2020/12/23 2:35:47 PM GMT-3	Ciências biológicas	Mestra/Mestre	Mestrado em Genética e Biologia Molecular	5	Sim	Assisti uma parte da programação ao vivo e parte posteriormente pelos links do YouTube	5		Não	5		Não	3	5	Problemas com a conexão de internet	Fundamental, manter em futuros eventos	Fundamental, manter em futuros eventos	Não	Não participei :(	3
2020/12/23 2:35:59 PM GMT-3	Ciências biológicas	Graduada/Graduado	Engenharia Agronômica	5	Sim	Não assisti à programação completa, apenas assisti o que pude ver ao vivo	5		Sim	5		Não	5	5	Acesso aos e-mails com notícias do I WOB20	Fundamental, manter em futuros eventos	Fundamental, manter em futuros eventos	Não	Não participei :(	3
2020/12/23 2:36:36 PM GMT-3	Ciências biológicas	Doutora/Doutor	Biotecnologia	4	Sim	Assisti uma parte da programação ao vivo e parte posteriormente pelos links do YouTube	5		Sim	4		Sim	5	5	Problemas com a conexão de internet	Fundamental, manter em futuros eventos	Fundamental, manter em futuros eventos	Não	Não participei :(	3
2020/12/23 2:36:43 PM GMT-3	Ciências biológicas	Estudante de graduação	Ciências Biológicas	5	Sim	Assisti a programação completa pelas gravações no YouTube	5		Sim	5		Não	3	5	Problemas com a conexão de internet	Fundamental, manter em futuros eventos	Fundamental, manter em futuros eventos	Sim	#TeamJacaré	5
2020/12/23 2:36:59 PM GMT-3	Agronomia	Doutoranda (o)	Genética e Melhoramento	5	Sim	Assisti uma parte da programação ao vivo e parte posteriormente pelos links do YouTube	5		Sim	5		Não	5	5	Problemas com a conexão de internet	Fundamental, manter em futuros eventos	Fundamental, manter em futuros eventos	Não	Não participei :(	5
2020/12/23 2:37:20 PM GMT-3	Ciências biológicas	Doutoranda (o)	Biologia Funcional e Molecular	5	Sim	Assisti a programação completa ao vivo	5		Sim	4		Sim	5	5	Dificuldade de me concentrar durante o evento	Fundamental, manter em futuros eventos	Foi bom, mas evitar em futuros eventos	Não	Não participei :(	4
2020/12/23 2:37:40 PM GMT-3	Ciências da computação	Mestranda (o)	Graduado	5	Não	Assisti uma parte da programação ao vivo e parte posteriormente pelos links do YouTube	5		Sim	5		Sim	4	5	Dificuldade de me concentrar durante o evento;Preenchimento das listas de presença	Fundamental, manter em futuros eventos	Fundamental, manter em futuros eventos	Não	Não participei :(	3
2020/12/23 2:39:06 PM GMT-3	Interdisciplinar	Mestranda (o)	Informática Biomédica	5	Sim	Assisti uma parte da programação ao vivo e parte posteriormente pelos links do YouTube	5		Sim	5		Sim	5	5	Não participei	Foi bom, mas evitar em futuros eventos	Fundamental, manter em futuros eventos	Não	Não participei :(	3
2020/12/23 2:39:10 PM GMT-3	Interdisciplinar	Graduada/Graduado	Física	5	Não	Assisti a programação completa ao vivo	5		Sim	5		Sim	5	5	Preenchimento das listas de presença	Fundamental, manter em futuros eventos	Foi bom, mas evitar em futuros eventos	Não	Não participei :(	3
2020/12/23 2:39:19 PM GMT-3	FARMÁCIA	Mestranda (o)	ESPECIALIZAÇÃO GESTÃO EM SAÚDE PÚBLICA	5	Sim	Assisti uma parte da programação ao vivo e parte posteriormente pelos links do YouTube	5	Caso consigam 2x ao ano, seria muito interessante, visto que abre muitos horizontes de aprendizado e informação quando a Bioinformática/Biomol	Sim	4		Sim	4	5	Não houve problema, muito bem organizado e cronometrado os prazos entre as palestras (raros casos se prolongaram)	Fundamental, manter em futuros eventos	Fundamental, manter em futuros eventos	Não	Não participei :(	3		Parabéns, aguardo os próximos.
2020/12/23 2:39:25 PM GMT-3	Ciências biológicas	Doutora/Doutor	DOUTORA EM CIENCIAS DA SAUDE	5	Sim	Assisti a programação completa ao vivo	5		Sim	5		Sim	5	5	Dificuldade de me concentrar durante o evento	Fundamental, manter em futuros eventos	Fundamental, manter em futuros eventos	Sim	#TeamCapivara	5
2020/12/23 2:40:02 PM GMT-3	Ciências biológicas	Mestranda (o)	Biologia	4	Sim	Assisti a programação completa ao vivo	5		Sim	4		Sim	2	5	Problemas com a conexão de internet;Dificuldade de me concentrar durante o evento	Fundamental, manter em futuros eventos	Fundamental, manter em futuros eventos	Sim	#TeamJaguatirica	5
2020/12/23 2:40:52 PM GMT-3	Ciências biológicas	Estudante de graduação	Biomedicina	5	Sim	Assisti uma parte da programação ao vivo e parte posteriormente pelos links do YouTube	5		Não	5		Não	1	5	Dificuldade de me concentrar durante o evento	Fundamental, manter em futuros eventos	Fundamental, manter em futuros eventos	Não	Não participei :(	5
2020/12/23 2:41:13 PM GMT-3	Ciências biológicas	Estudante de graduação	Ciências Biológicas	5	Sim	Assisti a programação completa ao vivo	5	Gostei muito dos assuntos abordados, os palestrantes foram muito didáticos.	Sim	4		Não	2	5	Dificuldade em realizar doações para a campanha beneficente "Projeto X"	Fundamental, manter em futuros eventos	Fundamental, manter em futuros eventos	Sim	#TeamJaguatirica	5	Continuar com a dinâmica nos próximos eventos!			Muito obrigado pela oportunidade!
2020/12/23 2:41:47 PM GMT-3	Ciências biológicas	Estudante de graduação	Biomedicina	4	Sim	Assisti a programação completa ao vivo	5		Sim	5		Não	2	5	Problemas com a conexão de internet;Dificuldade de me concentrar durante o evento	Fundamental, manter em futuros eventos	Fundamental, manter em futuros eventos	Não	Não participei :(	3		Parabéns a toda equipe pela organização do evento. A programação foi perfeita!		Tenho descoberto na bioinformática uma grande ferramenta e quero continuar estudando o tema mais a fundo. Espero que em breve possa participar de um curso presencial no campus da UFGM.
2020/12/23 2:44:15 PM GMT-3	Ciências biológicas	Estudante de graduação	estudante de biomedicina	5	Sim	Assisti uma parte da programação ao vivo e parte posteriormente pelos links do YouTube	4	Achei algumas partes muito técnicas,no entanto, entendo que irei pesquisar mais posterior , isso não limita o conhecimento	Sim	5		Não	1	5	Problemas com a conexão de internet	Fundamental, manter em futuros eventos	Fundamental, manter em futuros eventos	Não	Não participei :(	1		Eu adorei que vocês utilizaram intérpretes acho super necessário tendo em base que vivemos em um mundo de ouvintes	Acho que uma linguagem um pouco mais clara, porém entendo a percepção técnica de utilizar palavras específicas	Agradeço muito por divulgar conhecimento!!
2020/12/23 2:44:53 PM GMT-3	Ciências biológicas	Mestranda (o)	FARMÁCIA	5	Sim	Assisti uma parte da programação ao vivo e parte posteriormente pelos links do YouTube	5		Não	5		Sim	5	5	Preenchimento das listas de presença	Fundamental, manter em futuros eventos	Fundamental, manter em futuros eventos	Não	Não participei :(	5
2020/12/23 2:44:54 PM GMT-3	Ciências biológicas	Estudante de graduação	Ciências Biológicas	5	Sim	Assisti uma parte da programação ao vivo e parte posteriormente pelos links do YouTube	5		Sim	4		Não	3	5	Problemas com a conexão de internet	Fundamental, manter em futuros eventos	Fundamental, manter em futuros eventos	Não	Não participei :(	3
2020/12/23 2:45:14 PM GMT-3	Ciências biológicas	Pós-doc em andamento	Doutora em Genética	5	Sim	Assisti a programação completa ao vivo	5	Gostaria que fizessem mais cursos práticos, a parte teórica é boa, mas acredito que a dificuldade de quem tá começando seja na prática.	Sim	4		Não	1	5	dificuldade em acompanhar algumas aulas práticas que foram muito rápidas	Fundamental, manter em futuros eventos	Fundamental, manter em futuros eventos	Não	Não participei :(	3		O formato foi ótimo!	Acredito que a parte prática precisa ser executada com mais tempo, para todos conseguirem acompanhar.	Eu só tenho a agradecer o empenho em realizar um workshop tão bom! Gostaria muito de pedir um workshop sobre montagem e anotação de genomas procarióticos.
2020/12/23 2:45:22 PM GMT-3	Ciências biológicas	Estudante de graduação	Biotecnologia	5	Não	Assisti uma parte da programação ao vivo e parte posteriormente pelos links do YouTube	5		Sim	5		Não	5	5	Problemas com a conexão de internet;Dificuldade em realizar doações para a campanha beneficente "Projeto X"	Fundamental, manter em futuros eventos	Fundamental, manter em futuros eventos	Não	Não participei :(	5
2020/12/23 2:45:46 PM GMT-3	Ciências biológicas	Estudante de graduação	Ensino Médio	5	Sim	Assisti a programação completa ao vivo	5		Sim	5		Sim	5	5	Problemas com a conexão de internet	Fundamental, manter em futuros eventos	Fundamental, manter em futuros eventos	Não	Não participei :(	3
2020/12/23 2:46:05 PM GMT-3	Ciências da computação	Pós-doc em andamento	Bioinformática	4	Não	Assisti uma parte da programação ao vivo e parte posteriormente pelos links do YouTube	4		Sim	4		Sim	5	5	Não tive problemas	Fundamental, manter em futuros eventos	Fundamental, manter em futuros eventos	Não	Não participei :(	5
2020/12/23 2:46:15 PM GMT-3	Ciências biológicas	Doutora/Doutor	Ciências Veterinárias	4	Sim	Assisti a programação completa ao vivo	4		Sim	4		Não	3	4	Problemas com a conexão de internet	Fundamental, manter em futuros eventos	Fundamental, manter em futuros eventos	Sim	#TeamJaguatirica	3
2020/12/23 2:47:27 PM GMT-3	Ensino Médio	Estudante de ensino médio	Ensino Médio	5	Sim	Assisti a programação completa ao vivo	5		Sim	5		Não	3	5	Problemas com a conexão de internet	Fundamental, manter em futuros eventos	Fundamental, manter em futuros eventos	Não	Não participei :(	3
2020/12/23 2:47:34 PM GMT-3	Ciências biológicas	Estudante de graduação	ensino médio?	4	Sim	Assisti a programação completa ao vivo	5		Não	4		Não	3	5	Acesso aos e-mails com notícias do I WOB20	Fundamental, manter em futuros eventos	Fundamental, manter em futuros eventos	Não	Não participei :(	3
2020/12/23 2:47:39 PM GMT-3	Ciências biológicas	Doutoranda (o)	Ciências Veterinárias	5	Sim	Assisti a programação completa ao vivo	4		Sim	4		Sim	3	4	Dificuldade em acessar os links do YouTube;Preenchimento das listas de presença	Fundamental, manter em futuros eventos	Fundamental, manter em futuros eventos	Não	Não participei :(	4
2020/12/23 2:48:05 PM GMT-3	Ciências biológicas	Graduada/Graduado	Ciências Biológicas	4	Sim	Assisti uma parte da programação ao vivo e parte posteriormente pelos links do YouTube	5		Sim	4		Sim	2	5	Problemas com a conexão de internet;Dificuldade de me concentrar durante o evento	Fundamental, manter em futuros eventos	Fundamental, manter em futuros eventos	Sim	#TeamJaguatirica	5
2020/12/23 2:48:55 PM GMT-3	Ciências biológicas	Mestranda (o)	Ciências Biológicas	5	Não	Não assisti à programação completa, apenas assisti o que pude ver ao vivo	5	Achei bem interessante a dinâmica do evento. Só tenho a parabenizar!	Não	5		Sim	5	5	Problemas com a conexão de internet;Preenchimento das listas de presença	Fundamental, manter em futuros eventos	Fundamental, manter em futuros eventos	Não	Não participei :(	3
2020/12/23 2:49:00 PM GMT-3	Ciências biológicas	Estudante de graduação	Biomedicina	5	Sim	Assisti uma parte da programação ao vivo e parte posteriormente pelos links do YouTube	5		Não	4		Sim	5	5	Problemas com a conexão de internet;Dificuldade de me concentrar durante o evento	Fundamental, manter em futuros eventos	Fundamental, manter em futuros eventos	Não	Não participei :(	3
2020/12/23 2:49:32 PM GMT-3	Ciências biológicas	Estudante de graduação	Ensino médio	5	Sim	Assisti a programação completa ao vivo	5		Sim	5		Não	5	5	Problemas com a conexão de internet;Dificuldade de me concentrar durante o evento	Fundamental, manter em futuros eventos	Fundamental, manter em futuros eventos	Não	Não participei :(	3
2020/12/23 2:50:32 PM GMT-3	Biomedicina	Estudante de graduação	Ensino médio	5	Sim	Assisti a programação completa ao vivo	5		Não	5		Não	1	5	Conciliar o eventos com as atividades do projeto	Fundamental, manter em futuros eventos	Fundamental, manter em futuros eventos	Não	Não participei :(	5
2020/12/23 2:50:39 PM GMT-3	Ciências biológicas	Mestranda (o)	Biotecnologia	5	Sim	Assisti a programação completa ao vivo	5	Ameiiiiiiii e quero que mesmo após pandemia essa possibilidade online seja ofertada.	Sim	5	Amei os temas abordados além de insentivo foram acalento.	Sim	5	5	nenhuma	Fundamental, manter em futuros eventos	Fundamental, manter em futuros eventos	Sim	#TeamJaguatirica	5	Ameeeeeeeiiiiiiii			Melhor evento que participei esse ano.
2020/12/23 2:53:13 PM GMT-3	Ciências biológicas	Pós-doc concluído	Bioinformatica	5	Sim	Assisti a programação completa ao vivo	5		Sim	5		Sim	5	5	Dificuldade em acessar os links do YouTube	Fundamental, manter em futuros eventos	Fundamental, manter em futuros eventos	Sim	#TeamJaguatirica	5
2020/12/23 2:54:20 PM GMT-3	Ciências biológicas	Graduada/Graduado	Ciências Biológicas	5	Sim	Assisti uma parte da programação ao vivo e parte posteriormente pelos links do YouTube	5		Sim	5		Não	5	5	Problemas com a conexão de internet	Fundamental, manter em futuros eventos	Fundamental, manter em futuros eventos	Não	Não participei :(	5
2020/12/23 2:55:36 PM GMT-3	Interdisciplinar	Estudante de graduação	Sou estudante de graduação	4	Não	Não assisti à programação completa, apenas assisti o que pude ver ao vivo	5		Não	4		Sim	4	4	Dificuldade de me concentrar durante o evento	Fundamental, manter em futuros eventos	Fundamental, manter em futuros eventos	Não	Não participei :(	4
2020/12/23 2:55:47 PM GMT-3	Ciências biológicas	Pós-doc concluído	Terapia gênica	3	Não	Assisti a programação completa ao vivo	3		Não	4		Não	2	5	Dificuldade em acessar os links do YouTube;Preenchimento das listas de presença	Fundamental, manter em futuros eventos	Fundamental, manter em futuros eventos	Não	Não participei :(	3
2020/12/23 2:56:07 PM GMT-3	Interdisciplinar	Doutoranda (o)	Graduação em Engenharia Ambiental	5	Sim	Assisti uma parte da programação ao vivo e parte posteriormente pelos links do YouTube	5	Parabéns pela iniciativa	Sim	5		Não	5	5	Dificuldade de me concentrar durante o evento	Fundamental, manter em futuros eventos	Fundamental, manter em futuros eventos	Não	Não participei :(	5
2020/12/23 2:56:34 PM GMT-3	Ciências biológicas	Graduada/Graduado	Ciências Biológicas	5	Sim	Assisti uma parte da programação ao vivo e parte posteriormente pelos links do YouTube	5		Sim	5		Não	5	5	Problemas com a conexão de internet	Fundamental, manter em futuros eventos	Fundamental, manter em futuros eventos	Não	Não participei :(	5
2020/12/23 2:56:36 PM GMT-3	Tecnico em alimentos	Estudante de ensino técnico	Tecnico	4	Sim	Assisti a programação completa ao vivo	4		Sim	5		Sim	4	4	Acesso aos e-mails com notícias do I WOB20	Fundamental, manter em futuros eventos	Fundamental, manter em futuros eventos	Não	Não participei :(	4
2020/12/23 2:57:04 PM GMT-3	Biomedicina	Mestranda (o)	Biomedica	4	Não	Assisti uma parte da programação ao vivo e parte posteriormente pelos links do YouTube	5		Não	5		Não	3	5	Problemas com a conexão de internet;Dificuldade de me concentrar durante o evento;Dificuldade em realizar doações para a campanha beneficente "Projeto X"	Fundamental, manter em futuros eventos	Fundamental, manter em futuros eventos	Sim	#TeamJaguatirica	4
2020/12/23 2:57:27 PM GMT-3	Ciências biológicas	Mestranda (o)	Ciências Biológicas	5	Sim	Assisti uma parte da programação ao vivo e parte posteriormente pelos links do YouTube	5		Sim	5	Muito enriquecedor. Parabéns!	Sim	5	5	Dificuldade em acessar os links do YouTube;Dificuldade de me concentrar durante o evento	Fundamental, manter em futuros eventos	Fundamental, manter em futuros eventos	Não	Não participei :(	5
2020/12/23 2:58:47 PM GMT-3	Zootecnia	Doutoranda (o)	Genética e Melhoramento Animal	5	Sim	Assisti uma parte da programação ao vivo e parte posteriormente pelos links do YouTube	5	Amei o evento!!	Não	5	foram ótimas	Sim	5	5	nenhuma	Fundamental, manter em futuros eventos	Fundamental, manter em futuros eventos	Não	Não participei :(	5	.	Amei o evento	.	.
2020/12/23 2:59:08 PM GMT-3	Biotecnologia	Pós-doc em andamento	Biotecnologia	5	Sim	Assisti a programação completa ao vivo	5		Sim	5		Não	2	5	Problemas com a conexão de internet	Fundamental, manter em futuros eventos	Fundamental, manter em futuros eventos	Não	Não participei :(	2		Parabéns pelo evento. Tudo muito bem organizado e as palestras foram excelentes!
2020/12/23 2:59:18 PM GMT-3	Ciências biológicas	Mestranda (o)	Ciências Biológicas	5	Sim	Assisti uma parte da programação ao vivo e parte posteriormente pelos links do YouTube	5		Sim	5		Sim	5	5	Choque de horário com outras atividades acadêmicas.	Fundamental, manter em futuros eventos	Fundamental, manter em futuros eventos	Não	Não participei :(	3		Evento extremamente bem organizado e fundamental nesse ano tão turbulento. Um dos melhores que vi, mesmo com as dificuldades do ensino remoto, parabéns a equipe.	Talvez a inclusão de apresentações de trabalhos acadêmicos seja uma boa.	Sensacional a preocupação em fazer um evento tão bom e gratuito para todos. Fiquei mt satisfeito com tudo que proporcionaram.
2020/12/23 2:59:27 PM GMT-3	Ciências da computação	Estudante de graduação	Especialista em Gestão de Projetos	5	Sim	Assisti uma parte da programação ao vivo e parte posteriormente pelos links do YouTube	5		Sim	5		Não	5	5	Acesso aos e-mails com notícias do I WOB20	Fundamental, manter em futuros eventos	Fundamental, manter em futuros eventos	Não	Não participei :(	5
2020/12/23 2:59:34 PM GMT-3	Ciências biológicas	Mestranda (o)	Ciências Biológicas	5	Sim	Assisti uma parte da programação ao vivo e parte posteriormente pelos links do YouTube	5		Sim	5	Muito enriquecedor. Parabéns!	Sim	5	5	Dificuldade em acessar os links do YouTube;Dificuldade de me concentrar durante o evento	Fundamental, manter em futuros eventos	Fundamental, manter em futuros eventos	Não	Não participei :(	5
2020/12/23 3:00:38 PM GMT-3	Ciências biológicas	Estudante de graduação	estudante de biomedicina	5	Sim	Assisti uma parte da programação ao vivo e parte posteriormente pelos links do YouTube	4		Sim	3		Não	3	5	Problemas com a conexão de internet	Fundamental, manter em futuros eventos	Fundamental, manter em futuros eventos	Não	Não participei :(	3
2020/12/23 3:00:47 PM GMT-3	Ciências biológicas	Doutoranda (o)	Ciências da Saúde - Substâncias Bioativas	5	Não	Assisti uma parte da programação ao vivo e parte posteriormente pelos links do YouTube	5	Tudo muito bem organizado, e as plataformas bem elaboradas.	Não	4		Não	4	5	Nenhuma dificuldade	Fundamental, manter em futuros eventos	Fundamental, manter em futuros eventos	Não	Não participei :(	3		Excelente evento, e sendo online, foi um dos que mais gostei no ano todo.
2020/12/23 3:02:01 PM GMT-3	Ciências biológicas	Mestra/Mestre	Oncologia	5	Não	Não assisti à programação completa, apenas assisti o que pude ver ao vivo	5		Sim	5		Sim	5	5	Dificuldade de me concentrar durante o evento	Fundamental, manter em futuros eventos	Fundamental, manter em futuros eventos	Sim	#TeamJaguatirica	5
2020/12/23 3:02:27 PM GMT-3	Biotecnologia	Mestranda (o)	Biotecnologia	5	Sim	Assisti uma parte da programação ao vivo e parte posteriormente pelos links do YouTube	5		Sim	5		Sim	5	5	Acesso aos e-mails com notícias do I WOB20	Fundamental, manter em futuros eventos	Fundamental, manter em futuros eventos	Não	Não participei :(	4				Obrigado pela oportunidade de poder participar do evento!
2020/12/23 3:02:35 PM GMT-3	Ciências biológicas	Mestranda (o)	Bacharel	5	Sim	Assisti a programação completa ao vivo	5		Sim	5		Sim	5	5	Preenchimento das listas de presença	Fundamental, manter em futuros eventos	Fundamental, manter em futuros eventos	Não	Não participei :(	5		Parabéns pela iniciativa, as palestras foram maravilhosas e o projeto que vocês desenvolvem é inspirador demais. Continuem assim, mal posso esperar pelo próximo evento!!!!
2020/12/23 3:02:43 PM GMT-3	Zootecnia	Doutoranda (o)	Genética e Melhoramento Animal	5	Sim	Assisti uma parte da programação ao vivo e parte posteriormente pelos links do YouTube	5	.	Não	5	.	Sim	5	5	nenhum	Fundamental, manter em futuros eventos	Fundamental, manter em futuros eventos	Não	Não participei :(	5	.	.	.	.
2020/12/23 3:02:57 PM GMT-3	Ciências biológicas	Mestra/Mestre	Biologia Experimental	5	Sim	Assisti uma parte da programação ao vivo e parte posteriormente pelos links do YouTube	5		Sim	5		Não	4	5	Problemas com a conexão de internet	Fundamental, manter em futuros eventos	Fundamental, manter em futuros eventos	Não	Não participei :(	4		O evento foi ótimo, esclarecedor, bem organizado, parabéns a todos pela organização.
2020/12/23 3:03:14 PM GMT-3	Interdisciplinar	Doutoranda (o)	Bioinformatica	5	Sim	Assisti a programação completa ao vivo	5		Sim	5		Sim	5	5	Problemas com a conexão de internet;Dificuldade de me concentrar durante o evento	Fundamental, manter em futuros eventos	Fundamental, manter em futuros eventos	Não	Não participei :(	4
2020/12/23 3:03:40 PM GMT-3	Ciências biológicas	Estudante de graduação	Medicina	5	Sim	Assisti uma parte da programação ao vivo e parte posteriormente pelos links do YouTube	5		Não	4		Não	2	4	Dificuldade de me concentrar durante o evento	Fundamental, manter em futuros eventos	Fundamental, manter em futuros eventos	Não	Não participei :(	3
2020/12/23 3:05:07 PM GMT-3	Ciências biológicas	Estudante de graduação	Ciências Biológicas	4	Não	Não assisti à programação completa, apenas assisti o que pude ver ao vivo	5		Não	5		Não	5	5	Nenhuma	Fundamental, manter em futuros eventos	Fundamental, manter em futuros eventos	Não	Não participei :(	5
2020/12/23 3:05:25 PM GMT-3	Ciências biológicas	Mestra/Mestre	Mestrado em Ensino de Ciências e matemática	5	Sim	Assisti uma parte da programação ao vivo e parte posteriormente pelos links do YouTube	5		Sim	5		Não	5	5	Nenhuma	Fundamental, manter em futuros eventos	Fundamental, manter em futuros eventos	Não	Não participei :(	5
2020/12/23 3:06:20 PM GMT-3	Ciências da computação	Graduada/Graduado	Sistemas de Informação	5	Sim	Assisti a programação completa ao vivo	5		Não	3		Não	3	5	Nenhum	Fundamental, manter em futuros eventos	Fundamental, manter em futuros eventos	Não	Não participei :(	3
2020/12/23 3:06:45 PM GMT-3	Ciências biológicas	Mestra/Mestre	asdf	5	Sim	Assisti uma parte da programação ao vivo e parte posteriormente pelos links do YouTube	5		Sim	5		Sim	5	5	Acesso aos e-mails com notícias do I WOB20	Fundamental, manter em futuros eventos	Foi bom, mas evitar em futuros eventos	Sim	#TeamJacaré	4
2020/12/23 3:06:56 PM GMT-3	Ciências biológicas	Mestra/Mestre	Genética e Biologia Molecular	5	Sim	Assisti a programação completa ao vivo	5		Sim	5		Não	5	5	Não tive	Fundamental, manter em futuros eventos	Fundamental, manter em futuros eventos	Não	Não participei :(	5		Foi muito bom, espero que tenha mais edições	Sempre fazer eventos online mesmo com os presenciais, para o acesso de quem mora em outros estados
2020/12/23 3:07:49 PM GMT-3	Ciências biológicas	Mestra/Mestre	asdf	5	Sim	Assisti uma parte da programação ao vivo e parte posteriormente pelos links do YouTube	5		Sim	5		Sim	5	5	Acesso aos e-mails com notícias do I WOB20	Fundamental, manter em futuros eventos	Foi bom, mas evitar em futuros eventos	Sim	#TeamJacaré	4
2020/12/23 3:07:51 PM GMT-3	Biotecnologia	Estudante de graduação	Biotecnologia	5	Não	Assisti uma parte da programação ao vivo e parte posteriormente pelos links do YouTube	5	Excelente workshop, foi o primeiro que participei que permitiu assistir as palestras depois e isso ajudou muito a ficar por dentro de tudo	Não	4	N/A	Não	3	5	Dificuldade de me concentrar durante o evento	Fundamental, manter em futuros eventos	Fundamental, manter em futuros eventos	Sim	#TeamJaguatirica	5	Foi muito divertido participar da taça das casas, foi uma surpresa ter ganhado	Muito obrigado a todos os organizadores e quem ajudou a esse evento ser possível, vocês foram incríveis! Espero que um dia eu possa ir ao evento presencialmente!	Não consigo ver pontos a se melhorar, me surpreendeu	Vocês são foda! Atitude linda a do projeto X ! Continuem assim SEMPRE!
2020/12/23 3:09:06 PM GMT-3	Ciências biológicas	Graduada/Graduado	a	5	Sim	Assisti a programação completa ao vivo	5	a	Sim	5		Sim	5	5	Acesso aos e-mails com notícias do I WOB20	Foi bom, mas evitar em futuros eventos	Fundamental, manter em futuros eventos	Sim	#TeamCobra	5
2020/12/23 3:09:13 PM GMT-3	Ciências exatas não computacionais	Mestranda (o)	Química	5	Sim	Assisti uma parte da programação ao vivo e parte posteriormente pelos links do YouTube	4		Não	4		Sim	5	5	Problemas com a conexão de internet	Fundamental, manter em futuros eventos	Fundamental, manter em futuros eventos	Não	Não participei :(	3
2020/12/23 3:09:18 PM GMT-3	Ciências biológicas	Mestra/Mestre	Mestre em genetica e biologia molecular	5	Sim	Assisti uma parte da programação ao vivo e parte posteriormente pelos links do YouTube	5		Sim	4		Sim	5	5	Preenchimento das listas de presença	Fundamental, manter em futuros eventos	Fundamental, manter em futuros eventos	Não	Não participei :(	1		uma organizacao maravilhosa, goste muito
2020/12/23 3:09:50 PM GMT-3	Ciências da Saúde	Pós-doc em andamento	Doutorado	5	Sim	Não assisti à programação completa, apenas assisti o que pude ver ao vivo	5		Não	5		Sim	5	5	Problemas com a conexão de internet;Acesso aos e-mails com notícias do I WOB20	Fundamental, manter em futuros eventos	Fundamental, manter em futuros eventos	Não	Não participei :(	5
2020/12/23 3:09:57 PM GMT-3	Saúde	Estudante de graduação	Odontologia	5	Sim	Assisti uma parte da programação ao vivo e parte posteriormente pelos links do YouTube	5		Sim	5		Sim	5	5	nenhuma dificuldade	Fundamental, manter em futuros eventos	Fundamental, manter em futuros eventos	Não	Não participei :(	3
2020/12/23 3:11:26 PM GMT-3	Ciências biológicas	Estudante de graduação	Graduação	4	Sim	Assisti a programação completa ao vivo	4		Não	4		Não	4	4	Dificuldade de me concentrar durante o evento	Fundamental, manter em futuros eventos	Fundamental, manter em futuros eventos	Não	Não participei :(	3
2020/12/23 3:11:48 PM GMT-3	Ciências biológicas	Estudante de graduação	Graduação em formação	5	Sim	Assisti uma parte da programação ao vivo e parte posteriormente pelos links do YouTube	5		Sim	4		Sim	4	5	Problemas com a conexão de internet	Fundamental, manter em futuros eventos	Fundamental, manter em futuros eventos	Não	Não participei :(	3		Ótimo evento, parabéns aos organizadores.
2020/12/23 3:12:32 PM GMT-3	Ciências biológicas	Mestra/Mestre	asdf	5	Sim	Assisti uma parte da programação ao vivo e parte posteriormente pelos links do YouTube	5		Sim	5		Sim	5	5	Acesso aos e-mails com notícias do I WOB20	Fundamental, manter em futuros eventos	Foi bom, mas evitar em futuros eventos	Sim	#TeamJacaré	4
2020/12/23 3:13:18 PM GMT-3	Interdisciplinar	Estudante de graduação	Engenharia de Bioprocessos e Biotecnologia	5	Sim	Assisti uma parte da programação ao vivo e parte posteriormente pelos links do YouTube	4		Sim	5		Sim	5	5	Nenhum	Fundamental, manter em futuros eventos	Fundamental, manter em futuros eventos	Não	Não participei :(	3
2020/12/23 3:15:18 PM GMT-3	Ciências biológicas	Graduada/Graduado	a	5	Sim	Assisti a programação completa ao vivo	5	a	Sim	5		Sim	5	5	Acesso aos e-mails com notícias do I WOB20	Foi bom, mas evitar em futuros eventos	Fundamental, manter em futuros eventos	Sim	#TeamCobra	5
2020/12/23 3:15:23 PM GMT-3	Ciências biológicas	Doutoranda (o)	Mestrado em Biologia Celular	4	Sim	Assisti a programação completa ao vivo	4		Sim	4		Não	3	4	Dificuldade de me concentrar durante o evento	Desnecessário, não repetir	Fundamental, manter em futuros eventos	Sim	#TeamJaguatirica	3
2020/12/23 3:16:03 PM GMT-3	Ciências Agrárias	Doutora/Doutor	Doutorado em Fitopatologia	4	Sim	Assisti uma parte da programação ao vivo e parte posteriormente pelos links do YouTube	4		Não	4		Não	4	4	Nenuhum	Fundamental, manter em futuros eventos	Fundamental, manter em futuros eventos	Não	Não participei :(	4
2020/12/23 3:19:56 PM GMT-3	Ciências biológicas	Pós-doc concluído	Bioinformática/transcriptômica	5	Não	Assisti uma parte da programação ao vivo e parte posteriormente pelos links do YouTube	5		Não	5		Sim	5	5	Problemas com a conexão de internet	Fundamental, manter em futuros eventos	Fundamental, manter em futuros eventos	Sim	#TeamJaguatirica	5
2020/12/23 3:20:50 PM GMT-3	Nutrição	Estudante de ensino técnico	.	5	Sim	Assisti a programação completa pelas gravações no YouTube	5	Nenhuma crítica	Sim	5	Nenhuma	Sim	5	5	Acesso aos e-mails com notícias do I WOB20	Fundamental, manter em futuros eventos	Fundamental, manter em futuros eventos	Sim	#TeamJaguatirica	5	Nenhuma
2020/12/23 3:21:11 PM GMT-3	Ciências da computação	Doutora/Doutor	Doutor em Genética e Biologia Molecular	5	Sim	Assisti a programação completa ao vivo	5		Sim	5		Sim	5	5	Problemas com a conexão de internet	Fundamental, manter em futuros eventos	Fundamental, manter em futuros eventos	Não	Não participei :(	5
2020/12/23 3:22:01 PM GMT-3	Ciências biológicas	Mestranda (o)	Ciências Biológicas	5	Sim	Assisti a programação completa ao vivo	5		Sim	5		Não	3	5	Dificuldade de me concentrar durante o evento	Fundamental, manter em futuros eventos	Fundamental, manter em futuros eventos	Não	Não participei :(	3
2020/12/23 3:23:00 PM GMT-3	Ciências da computação	Estudante de graduação	Engenharia de Computação	4	Sim	Assisti uma parte da programação ao vivo e parte posteriormente pelos links do YouTube	4		Sim	4		Sim	5	4	Problemas com a conexão de internet	Fundamental, manter em futuros eventos	Fundamental, manter em futuros eventos	Não	Não participei :(	3
2020/12/23 3:23:15 PM GMT-3	Ciências exatas não computacionais	Mestranda (o)	Mestrado em Matemática	5	Sim	Assisti uma parte da programação ao vivo e parte posteriormente pelos links do YouTube	5	Poderíamos ter eventos semestralmente.	Sim	5		Sim	5	5	Problemas com a conexão de internet	Fundamental, manter em futuros eventos	Fundamental, manter em futuros eventos	Não	Não participei :(	5
2020/12/23 3:27:21 PM GMT-3	Ciências biológicas	Estudante de graduação	7ª etapa	5	Não	Não assisti à programação completa, apenas à algumas palestras gravadas no YouTube	5		Não	5		Não	3	5	Problemas com a conexão de internet	Fundamental, manter em futuros eventos	Fundamental, manter em futuros eventos	Não	Não participei :(	3
2020/12/23 3:29:11 PM GMT-3	Ciências biológicas	Graduada/Graduado	Ciências biológicas	5	Sim	Assisti a programação completa ao vivo	5	Foi um dos eventos mais inclusivos e organizados que já participei. Obrigada pela oportunidade e parabéns!!!	Sim	5		Sim	5	5	Problemas com a conexão de internet	Fundamental, manter em futuros eventos	Fundamental, manter em futuros eventos	Sim	#TeamCobra	5	A ideia foi muito divertida! Adorei :)
2020/12/23 3:29:49 PM GMT-3	Ciências biológicas	Graduada/Graduado	MEDICINA	5	Sim	Assisti uma parte da programação ao vivo e parte posteriormente pelos links do YouTube	5		Sim	5		Não	3	5	nda	Fundamental, manter em futuros eventos	Fundamental, manter em futuros eventos	Não	Não participei :(	3
2020/12/23 3:30:33 PM GMT-3	Ciências biológicas	Doutoranda (o)	Biomedicina-Medicina	5	Sim	Assisti uma parte da programação ao vivo e parte posteriormente pelos links do YouTube	5		Não	4		Sim	4	5	Problemas com a conexão de internet	Fundamental, manter em futuros eventos	Fundamental, manter em futuros eventos	Não	Não participei :(	3		Muito próximo do que é oferecido no curso de verão. Tive a oportunidade de participar de 2 cursos (o 1º e o 3º). A qualidade nunca deixou a desejar e isso se reflete no Workshop Online. Todas as palestras e os palestrantes sempre nota 10.		Uma pena não ser presencial e não ter a confraternização ao final do último dia.
2020/12/23 3:31:38 PM GMT-3	Biotecnologia	Doutoranda (o)	Biotecnologia	5	Sim	Assisti a programação completa ao vivo	4	Maior ênfase em demonstrar na prática diferentes métodos em bioinformática	Não	4		Não	1	5	Problemas com a conexão de internet	Fundamental, manter em futuros eventos	Fundamental, manter em futuros eventos	Não	Não participei :(	3		A programação foi bem diversa e interessante!	Espera ver com mais especificidade a aplicação das técnicas de bioinformática. Como numa aula prática. Talvez com o formato online, seja difícil de realizar.	Muito interessante ver as campanhas beneficentes e a tradução em libras no evento. Enfatiza o papel das Universidades Federais de aproximar-se das pessoas e devolver mais à sociedade na medida que podemos!
2020/12/23 3:33:01 PM GMT-3	Ciências biológicas	Estudante de graduação	Ensino médio	4	Sim	Assisti a programação completa ao vivo	4		Sim	4		Não	3	4	Problemas com a conexão de internet	Fundamental, manter em futuros eventos	Fundamental, manter em futuros eventos	Não	Não participei :(	3		Interessante
2020/12/23 3:33:17 PM GMT-3	Ciências biológicas	Estudante de graduação	EM	5	Sim	Assisti uma parte da programação ao vivo e parte posteriormente pelos links do YouTube	5		Sim	5		Sim	5	5	Dificuldade de me concentrar durante o evento	Fundamental, manter em futuros eventos	Fundamental, manter em futuros eventos	Sim	#TeamJaguatirica	4
2020/12/23 3:34:11 PM GMT-3	Ciências biológicas	Doutoranda (o)	Genética e Biologia Molecular	5	Sim	Assisti a programação completa ao vivo	5	Não	Sim	5	Não	Sim	5	5	Problemas com a conexão de internet	Fundamental, manter em futuros eventos	Fundamental, manter em futuros eventos	Não	Não participei :(	3	Não
2020/12/23 3:35:41 PM GMT-3	Ciências biológicas	Doutoranda (o)	Mestre em Biociências	5	Sim	Assisti uma parte da programação ao vivo e parte posteriormente pelos links do YouTube	5		Não	5		Não	3	5	Nenhum	Fundamental, manter em futuros eventos	Fundamental, manter em futuros eventos	Não	Não participei :(	3		Parabéns pelo evento. Excelente organização, aulas e palestrantes	Mais cursos introdutórios para área	Parabéns mais uma vez à toda equipe!
2020/12/23 3:36:52 PM GMT-3	Ciências biológicas	Doutoranda (o)	Genética e Biologia molecular	5	Sim	Assisti uma parte da programação ao vivo e parte posteriormente pelos links do YouTube	5		Não	5		Sim	5	5	Dificuldade de me concentrar durante o evento	Fundamental, manter em futuros eventos	Fundamental, manter em futuros eventos	Não	Não participei :(	5
2020/12/23 3:41:27 PM GMT-3	PEDAGOGIA	Pós-doc concluído	PISICOMOTRICIDADE APLICADA A EDUCAÇÃO INFANTIL	5	Sim	Assisti uma parte da programação ao vivo e parte posteriormente pelos links do YouTube	5	PARABÉNS	Sim	5		Sim	5	4	Problemas com a conexão de internet	Fundamental, manter em futuros eventos	Fundamental, manter em futuros eventos	Não	Não participei :(	5		PARABÉNS		GOSTARIA DE SER AVISADA DOS PRÓXIMOS ENCONTROS
2020/12/23 3:42:02 PM GMT-3	Farmácia e Bioquímica	Pós-doc concluído	Imunologia	5	Sim	Assisti uma parte da programação ao vivo e parte posteriormente pelos links do YouTube	5	Foi ótima.	Sim	5	Foram muito boas.	Sim	5	5	nenhuma	Fundamental, manter em futuros eventos	Fundamental, manter em futuros eventos	Sim	#TeamCobra	3	Preenchi o formulário mas não recebi feedback quanto ao grupo que ganhou e como foi a premiação.	Foi ótimo!	Acho que seria interessante adicionar algumas aulas práticas, por exemplo de diferentes níveis: básico, intermediário e avançado.	Muito obrigada pela oportunidade! Foi excelente!
2020/12/23 3:44:02 PM GMT-3	Ciências biológicas	Doutoranda (o)	Mestre em Biologia Parasitária na Amazônia	4	Sim	Assisti a programação completa ao vivo	4		Sim	4		Não	4	4	Preenchimento das listas de presença	Fundamental, manter em futuros eventos	Fundamental, manter em futuros eventos	Não	Não participei :(	4
2020/12/23 3:47:23 PM GMT-3	Ciências biológicas	Estudante de graduação	Graduação	5	Não	Assisti uma parte da programação ao vivo e parte posteriormente pelos links do YouTube	5		Não	5		Sim	5	5	Dificuldade em acessar os links do YouTube;Preenchimento das listas de presença	Fundamental, manter em futuros eventos	Fundamental, manter em futuros eventos	Não	Não participei :(	3
2020/12/23 3:49:04 PM GMT-3	Ciências biológicas	Doutoranda (o)	Mestrado em Microbiologia	5	Não	Assisti uma parte da programação ao vivo e parte posteriormente pelos links do YouTube	4		Não	4		Sim	5	5	Dificuldade de me concentrar durante o evento	Fundamental, manter em futuros eventos	Fundamental, manter em futuros eventos	Não	Não participei :(	3		Achei muito interessante ter um intérprete de libras. Super inclusivo!
2020/12/23 3:49:05 PM GMT-3	Ciências da computação	Estudante de graduação	Sistemas de Informação	5	Sim	Assisti uma parte da programação ao vivo e parte posteriormente pelos links do YouTube	5		Sim	5		Sim	5	5	Problemas com a conexão de internet	Fundamental, manter em futuros eventos	Fundamental, manter em futuros eventos	Sim	#TeamJaguatirica	5	Parabéns, uma iniciativa inusitada e interessante. Ótima atividade para manter o engajamento. Obrigado	Parabéns aos organizadores. Ótimo evento.		Parabéns aos organizadores pela motivação nesse momento. Continuem com o ótimo trabalho. Abraço a todos.
2020/12/23 3:50:17 PM GMT-3	Ciências biológicas	Estudante de graduação	Biotecnologia	5	Não	Assisti uma parte da programação ao vivo e parte posteriormente pelos links do YouTube	5	Simplesmente incrível!	Não	5	Apenas elogios! Parabéns!	Sim	5	5	Nenhum	Fundamental, manter em futuros eventos	Fundamental, manter em futuros eventos	Não	Não participei :(	5
2020/12/23 3:51:13 PM GMT-3	Biotecnologia	Estudante de graduação	Biotecnologia	5	Não	Assisti uma parte da programação ao vivo e parte posteriormente pelos links do YouTube	5		Não	5		Não	3	5	Não tive dificuldades.	Fundamental, manter em futuros eventos	Fundamental, manter em futuros eventos	Sim	#TeamJaguatirica	5		Evento incrível, inclusivo e com profissionais maravilhosos! Foi uma honra ter participado.		Agradeço demais a organização do evento e parabenizo pela qualidade impecável!
2020/12/23 3:51:27 PM GMT-3	Contabilidade	Estudante de graduação	Contabilidade	5	Sim	Assisti a programação completa ao vivo	5		Sim	5		Sim	5	5	Problemas com a conexão de internet	Fundamental, manter em futuros eventos	Fundamental, manter em futuros eventos	Não	Não participei :(	5
2020/12/23 3:52:10 PM GMT-3	Ciências biológicas	Doutoranda (o)	Mestre em Biotecnologia	5	Sim	Assisti a programação completa ao vivo	5	Parabéns por disponibilizar um evento tão rico em conteúdo e ainda gratuitamente. As palestras foram excelentes, a forma como foi trabalhado e os temas de muito interesse. Nada a reclamar, só agradecer.	Sim	5	Bem diversificado, chamou-me a atenção por trazer áreas de trabalho fora do ambiente acadêmico, o que nos incentiva a também buscar mais este caminho para o futuro.	Sim	5	5	Nenhuma dificuldade.	Fundamental, manter em futuros eventos	Fundamental, manter em futuros eventos	Sim	#TeamJaguatirica	5
2020/12/23 3:52:40 PM GMT-3	Ciências da computação	Estudante de graduação	Engenharia de computação e informação	5	Sim	Assisti uma parte da programação ao vivo e parte posteriormente pelos links do YouTube	5		Não	1		Não	2	5	Nenhuma	Fundamental, manter em futuros eventos	Fundamental, manter em futuros eventos	Não	Não participei :(	2
2020/12/23 3:52:53 PM GMT-3	Ciências biológicas	Mestranda (o)	Especialização Lato sensu em Ciências da Saúde	5	Sim	Assisti uma parte da programação ao vivo e parte posteriormente pelos links do YouTube	5		Não	4		Sim	5	5	Dificuldade de me concentrar durante o evento	Fundamental, manter em futuros eventos	Fundamental, manter em futuros eventos	Não	Não participei :(	1
2020/12/23 3:55:07 PM GMT-3	Ciências biológicas	Mestranda (o)	Biotecnologia	5	Sim	Assisti a programação completa ao vivo	5		Não	5		Não	3	5	Nenhuma.	Fundamental, manter em futuros eventos	Fundamental, manter em futuros eventos	Não	Não participei :(	3
2020/12/23 3:55:19 PM GMT-3	Ciências biológicas	Doutoranda (o)	Genética e Biologia Molecular	5	Sim	Assisti a programação completa ao vivo	5		Sim	5		Sim	5	5	Nenhum	Fundamental, manter em futuros eventos	Fundamental, manter em futuros eventos	Não	Não participei :(	5
2020/12/23 3:55:25 PM GMT-3	Biotecnologia	Mestranda (o)	Biotecnologia	5	Sim	Assisti uma parte da programação ao vivo e parte posteriormente pelos links do YouTube	5		Sim	5		Não	3	5	Problemas com a conexão de internet;Acesso aos e-mails com notícias do I WOB20	Fundamental, manter em futuros eventos	Fundamental, manter em futuros eventos	Sim	#TeamCapivara	5	Achei uma metodologia divertida e uma forma de nos testarmos se entendemos o que foi passado durante as palestras. Acredito que, principalmente por ser um evento online, a taça das casas ajudou a tirar dúvidas sobre os assuntos. A minha casa não estava muito ativa no "salão comunal", mas acredito que essa ideia ajudou a criar um networking entre os participantes. Parabéns pela iniciativa!	Eu adorei o evento e pelos comentários que surgiram dos participantes durante o evento, fiquei com muita vontade de conhecer o curso presencial. Queria deixar os parabéns à toda organização, já organizei eventos e sei o quanto é corrido para conseguir realizar um evento bom e vocês foram ótimos!	O único ponto que deixou a desejar foi o acesso à informações. Descobri que vocês tinham um evento do Google Agenda somente no preenchimento do formulário, por exemplo.
2020/12/23 3:55:33 PM GMT-3	Ciências biológicas	Estudante de graduação	Técnico em Edificações	5	Sim	Assisti a programação completa ao vivo	5		Sim	5		Sim	4	4	Dificuldade de me concentrar durante o evento	Fundamental, manter em futuros eventos	Fundamental, manter em futuros eventos	Não	Não participei :(	5
2020/12/23 3:56:06 PM GMT-3	Ciências biológicas	Estudante de graduação	Ciências Biológicas	5	Sim	Assisti a programação completa ao vivo	5		Sim	5		Não	3	5	Problemas com a conexão de internet;Dificuldade de me concentrar durante o evento	Fundamental, manter em futuros eventos	Fundamental, manter em futuros eventos	Sim	#TeamJaguatirica	5
2020/12/23 3:59:49 PM GMT-3	Ciências biológicas	Estudante de graduação	Graduação	5	Não	Assisti uma parte da programação ao vivo e parte posteriormente pelos links do YouTube	5		Não	4		Sim	5	4	Dificuldade em acessar os links do YouTube;Dificuldade de me concentrar durante o evento;Preenchimento das listas de presença	Fundamental, manter em futuros eventos	Fundamental, manter em futuros eventos	Não	Não participei :(	3
2020/12/23 4:01:41 PM GMT-3	Ciências biológicas	Doutoranda (o)	Mestrado em Biotecnologia	5	Sim	Assisti a programação completa ao vivo	5		Sim	5		Sim	5	5	Dificuldade de me concentrar durante o evento	Fundamental, manter em futuros eventos	Fundamental, manter em futuros eventos	Sim	#TeamJaguatirica	5
2020/12/23 4:02:38 PM GMT-3	Ciências biológicas	Doutoranda (o)	Biotecnologia	5	Sim	Assisti uma parte da programação ao vivo e parte posteriormente pelos links do YouTube	5		Sim	5		Não	3	4	Problemas com a conexão de internet	Fundamental, manter em futuros eventos	Fundamental, manter em futuros eventos	Não	Não participei :(	1
2020/12/23 4:02:39 PM GMT-3	Ciências biológicas	Mestra/Mestre	Mestre em Ciências (parasitologia)	5	Sim	Assisti uma parte da programação ao vivo e parte posteriormente pelos links do YouTube	5		Sim	5		Não	3	5	Dificuldade de me concentrar durante o evento	Fundamental, manter em futuros eventos	Fundamental, manter em futuros eventos	Sim	#TeamJaguatirica	5		O evento foi bem organizado, gostei do tema das palestras e dos palestrantes escolhidos. A musica de inicio do dia do evento também era mto legal !!!!		Boa sorte nos próximos eventos!
2020/12/23 4:04:05 PM GMT-3	Agrária	Mestranda (o)	Zootecnista	5	Sim	Assisti a programação completa pelas gravações no YouTube	5	Parabéns pelo evento	Sim	5		Sim	5	5	Problemas com a conexão de internet	Fundamental, manter em futuros eventos	Fundamental, manter em futuros eventos	Não	Não participei :(	5		Parabéns pelo evento. Extremamente completo.
2020/12/23 4:04:58 PM GMT-3	Ciências biológicas	Mestranda (o)	Licenciatura em Ciências Biológicas	5	Sim	Assisti uma parte da programação ao vivo e parte posteriormente pelos links do YouTube	5	A realização do evento de forma remota foi incrível. Gostaria de sugerir minicursos, abrangentes, para o próximo Workshop.	Sim	5	Escolhas ótimas. Temas diversos, permitindo assistir sobre minha área e observar curiosamente sobre outras áreas.	Sim	5	4	Dificuldade de me concentrar durante o evento;Preenchimento das listas de presença	Fundamental, manter em futuros eventos	Fundamental, manter em futuros eventos	Não	Não participei :(	4	Não participei, por isso não posso opinar mais. Mas, achei a idéia muito criativa e interessante.	Só a agradecer por este ótimo evento!	Aumentar cada vez mais o evento... Com cursos, apresentações de trabalhos e tudo mais.	Obrigado!
2020/12/23 4:06:46 PM GMT-3	Ciências da saúde	Estudante de graduação	Ensino médio completo	5	Sim	Assisti uma parte da programação ao vivo e parte posteriormente pelos links do YouTube	5		Sim	5		Sim	5	5	Problemas com a conexão de internet;Dificuldade de me concentrar durante o evento;Preenchimento das listas de presença	Fundamental, manter em futuros eventos	Fundamental, manter em futuros eventos	Não	Não participei :(	5
2020/12/23 4:12:24 PM GMT-3	Ciências da computação	Estudante de graduação	Não possuo.	5	Sim	Assisti a programação completa ao vivo	5	Foi muito proveitoso entender mais um pouco sobre a aplicação da bioinformártica em diversas áreas.	Sim	5		Não	3	5	Nenhuma.	Fundamental, manter em futuros eventos	Fundamental, manter em futuros eventos	Não	Não participei :(	3		Desejo agradecer pelo conhecimento que foi transmitido ao longo dos três dias.
2020/12/23 4:13:11 PM GMT-3	Ciências biológicas	Mestra/Mestre	Metrado em Ciências Biológicas	5	Sim	Assisti uma parte da programação ao vivo e parte posteriormente pelos links do YouTube	5		Sim	5		Sim	5	5	nenhuma	Fundamental, manter em futuros eventos	Fundamental, manter em futuros eventos	Não	Não participei :(	3
2020/12/23 4:14:24 PM GMT-3	Ciências biológicas	Graduada/Graduado	Ciências Biológicas	5	Sim	Assisti uma parte da programação ao vivo e parte posteriormente pelos links do YouTube	5		Sim	5		Sim	5	5	Nenhuma.	Fundamental, manter em futuros eventos	Fundamental, manter em futuros eventos	Não	Não participei :(	3				Durante a graduação não pude participar devido ao horário. Online finalmente eu consegui participar.
2020/12/23 4:14:45 PM GMT-3	Ciências biológicas	Doutoranda (o)	Neurociências	5	Sim	Assisti uma parte da programação ao vivo e parte posteriormente pelos links do YouTube	5		Não	5		Sim	5	5	Problemas com a conexão de internet	Fundamental, manter em futuros eventos	Fundamental, manter em futuros eventos	Sim	#TeamJacaré	4
2020/12/23 4:15:08 PM GMT-3	Interdisciplinar	Doutoranda (o)	Bioinformática	5	Sim	Assisti a programação completa ao vivo	5	Parabéns e muito obrigada pelo evento muito bom!	Sim	5	Foram todos ótimos! Muito obrigada!	Não	3	5	Nada. Tudo ótimo!	Fundamental, manter em futuros eventos	Fundamental, manter em futuros eventos	Sim	#TeamCapivara	5	Foi muito legal! Que venha a próxima!	Tudo maravilhoso!	No momento, nada vem à minha mente.	Admiro demais a dedicação e organização de vocês. Sei como trabalham duro e sempre nos proporcionam excelentes eventos. Tô aqui, né?! Continuem arrasando, pois vocês ajudam muitas pessoas. (era pra escrever o que estava no coração, eu escrevi.)
2020/12/23 4:16:19 PM GMT-3	Ciências biológicas	Estudante de graduação	Técnico em Análises Clínicas	5	Não	Assisti uma parte da programação ao vivo e parte posteriormente pelos links do YouTube	5		Não	5		Não	3	5	Problemas com a conexão de internet	Fundamental, manter em futuros eventos	Fundamental, manter em futuros eventos	Sim	#TeamJaguatirica	5		Parabéns pelo evento, foi sensacional
2020/12/23 4:17:41 PM GMT-3	Ciências da Saúde	Graduada/Graduado	Farmácia	5	Sim	Assisti a programação completa ao vivo	5		Sim	5		Não	2	5	Dificuldade de me concentrar durante o evento;Preenchimento das listas de presença;Acesso aos e-mails com notícias do I WOB20	Fundamental, manter em futuros eventos	Fundamental, manter em futuros eventos	Não	Não participei :(	3
2020/12/23 4:18:26 PM GMT-3	Biomedicina	Graduada/Graduado	Graduação em Biomedicina	5	Sim	Assisti a programação completa ao vivo	5		Sim	5		Sim	5	5	Acesso aos e-mails com notícias do I WOB20	Fundamental, manter em futuros eventos	Fundamental, manter em futuros eventos	Não	Não participei :(	5
2020/12/23 4:19:51 PM GMT-3	Ciências biológicas	Mestranda (o)	Ciências Biológicas	5	Sim	Assisti uma parte da programação ao vivo e parte posteriormente pelos links do YouTube	5		Sim	5		Não	2	5	Dificuldade de me concentrar durante o evento	Fundamental, manter em futuros eventos	Fundamental, manter em futuros eventos	Não	Não participei :(	2
2020/12/23 4:20:41 PM GMT-3	Ciências biológicas	Estudante de graduação	Tecnologo em Radiologia	5	Sim	Assisti a programação completa ao vivo	5		Não	4		Não	4	4	Acesso aos e-mails com notícias do I WOB20	Fundamental, manter em futuros eventos	Fundamental, manter em futuros eventos	Sim	#TeamCapivara	5
2020/12/23 4:23:39 PM GMT-3	Ciências biológicas	Estudante de graduação	Biotecnologia	4	Sim	Assisti uma parte da programação ao vivo e parte posteriormente pelos links do YouTube	4		Não	4		Não	3	4	Dificuldade de me concentrar durante o evento	Fundamental, manter em futuros eventos	Fundamental, manter em futuros eventos	Não	Não participei :(	3		As palestras foram muito boas, organizadas de maneira muito coerente que manteve um bom desenvolvimento de temas em cada dia de evento	Acho que talvez pudesse haver mais tempo para certas palestras de base como a palestra de evolução das tecnologias de sequenciamento. Também seria bom realizar entre os palestrantes uma conversa sobre temas em comum entre diferentes palestras para evitar que o evento se torne repetitivo.	Foi um ótimo evento, acredito que de fácil compreensão a alguém que esteja começando na área e envolvendo assuntos mais interessantes para quem já tem uma base em bioinfo.
2020/12/23 4:23:41 PM GMT-3	Ciências biológicas	Estudante de graduação	Equipamentos Biomédicos	5	Sim	Assisti a programação completa ao vivo	5		Sim	5		Sim	5	5	Dificuldade de me concentrar durante o evento;Dificuldade em realizar doações para a campanha beneficente "Projeto X"	Fundamental, manter em futuros eventos	Fundamental, manter em futuros eventos	Sim	#TeamCapivara	5
2020/12/23 4:23:49 PM GMT-3	Ciências biológicas	Doutoranda (o)	Mestrado en Biologia Molecular	4	Sim	Assisti uma parte da programação ao vivo e parte posteriormente pelos links do YouTube	4		Sim	4		Sim	4	4	Problemas com a conexão de internet;Dificuldade de me concentrar durante o evento	Fundamental, manter em futuros eventos	Fundamental, manter em futuros eventos	Não	Não participei :(	3		Muitos parabéns pelo workshop, é a primeira vez que participo e quedé encantado e aprendi bastante.	Tem temas muito amplos que precisam dividir em palestras 1 e 2. Se é possivel colocar um pouco de pratica, seria legal. Permitir doar voluntariamente estimula a nossa solidaridade, mas em minha humilde opininião, o workshop deveria tem uma taxa de inscrição e que esta seja doada para o programa de caridade.	Agradeço ao team de organização, palestrantes e colegas que fizerom possivel o workshop e espero que continuem oferecendo eventos assim de ótimos.
2020/12/23 4:24:40 PM GMT-3	Biotecnologia	Estudante de graduação	Bacharelado em Biotecnololgia	5	Sim	Assisti uma parte da programação ao vivo e parte posteriormente pelos links do YouTube	5		Sim	5		Não	1	5	Dificuldade de me concentrar durante o evento	Fundamental, manter em futuros eventos	Fundamental, manter em futuros eventos	Sim	#TeamCobra	5
2020/12/23 4:26:53 PM GMT-3	Ciências biológicas	Pós-doc em andamento	Doutorado em Ciências área de concentração Fitopatologia	5	Sim	Assisti uma parte da programação ao vivo e parte posteriormente pelos links do YouTube	4		Sim	4		Sim	4	5	Problemas com a conexão de internet	Fundamental, manter em futuros eventos	Fundamental, manter em futuros eventos	Não	#TeamCapivara	4
2020/12/23 4:29:52 PM GMT-3	Biomedicina	Estudante de graduação	Ensino Médio	5	Sim	Assisti a programação completa ao vivo	5		Sim	5		Sim	5	5	Dificuldade em acessar os links do YouTube	Fundamental, manter em futuros eventos	Fundamental, manter em futuros eventos	Sim	#TeamJaguatirica	5	Mantenha nas próximas edições.		Talvez seria interessante prolongar o evento por mais dias e, diminuir a carga diária.
2020/12/23 4:32:12 PM GMT-3	Ciências biológicas	Mestra/Mestre	Maestría en Ciencias Biotecnológicas	4	Sim	Assisti a programação completa ao vivo	4	Buen curso, esperamos más este 2021	Sim	5	Muy buena la participación de los oradores	Sim	5	5	Problemas com a conexão de internet	Fundamental, manter em futuros eventos	Fundamental, manter em futuros eventos	Não	Não participei :(	5		Very well
2020/12/23 4:32:49 PM GMT-3	Biotecnologia	Estudante de graduação	Biotecnologia	5	Sim	Assisti a programação completa ao vivo	4		Sim	4		Não	3	5	Dificuldade de me concentrar durante o evento	Fundamental, manter em futuros eventos	Fundamental, manter em futuros eventos	Não	Não participei :(	3		Eu achei super legal a iniciativa, eu participei do curso de verão de bioinformática desse ano, e o workshop so agregou mais conhecimento.	Eu achei um pouco estranho o fato de ter que sair de uma janela do YouTube e abrir outra pra prosseguir pra outra palestras. Mas no final percebi que fica bem mais organizado assim, da até pra fazer q playlist do evento.	Acho que na próxima poderia começar um pouco mais cedo, teve uma mesa redonda que demorou bastante e acabou lá pras 22h (no meu horário local), se não me engano.
2020/12/23 4:33:23 PM GMT-3	Biotecnologia	Estudante de graduação	Biotecnologia	5	Sim	Assisti a programação completa ao vivo	4		Sim	4		Não	3	5	Dificuldade de me concentrar durante o evento	Fundamental, manter em futuros eventos	Fundamental, manter em futuros eventos	Não	Não participei :(	3		Eu achei super legal a iniciativa, eu participei do curso de verão de bioinformática desse ano, e o workshop so agregou mais conhecimento.	Eu achei um pouco estranho o fato de ter que sair de uma janela do YouTube e abrir outra pra prosseguir pra outra palestras. Mas no final percebi que fica bem mais organizado assim, da até pra fazer q playlist do evento.	Acho que na próxima poderia começar um pouco mais cedo, teve uma mesa redonda que demorou bastante e acabou lá pras 22h (no meu horário local), se não me engano.
2020/12/23 4:33:49 PM GMT-3	Engenharia Bioquímica	Estudante de graduação	Engenharia Bioquímica	5	Sim	Assisti a programação completa ao vivo	5	nada a declarar.	Sim	5	nada a declarar.	Não	5	5	Dificuldade de me concentrar durante o evento	Fundamental, manter em futuros eventos	Fundamental, manter em futuros eventos	Não	Não participei :(	5	nada a declarar.	muito bom!	nada a declarar.	obrigado por compartilhar o conhecimento.
2020/12/23 4:34:52 PM GMT-3	Ciências biológicas	Mestranda (o)	Farmácia e Bioquímica	5	Sim	Assisti a programação completa ao vivo	5		Sim	5		Não	5	5	Preenchimento das listas de presença	Fundamental, manter em futuros eventos	Fundamental, manter em futuros eventos	Não	Não participei :(	5
2020/12/23 4:41:50 PM GMT-3	Ciências biológicas	Doutoranda (o)	Mestre	5	Sim	Assisti a programação completa pelas gravações no YouTube	5		Sim	5		Não	5	5	Problemas com a conexão de internet	Fundamental, manter em futuros eventos	Fundamental, manter em futuros eventos	Não	Não participei :(	5		Parabéns a organização	Nada
2020/12/23 4:43:15 PM GMT-3	Ciências biológicas	Mestra/Mestre	Genética e Biotecnologia	5	Sim	Assisti a programação completa ao vivo	5		Sim	4		Não	3	5	Problemas com a conexão de internet	Fundamental, manter em futuros eventos	Fundamental, manter em futuros eventos	Não	Não participei :(	3
2020/12/23 4:44:36 PM GMT-3	Ciências biológicas	Estudante de graduação	Biomedicina	5	Sim	Assisti a programação completa ao vivo	5		Sim	5		Não	4	5	Problemas com a conexão de internet	Fundamental, manter em futuros eventos	Fundamental, manter em futuros eventos	Não	Não participei :(	3
2020/12/23 4:48:39 PM GMT-3	Ciências exatas não computacionais	Pós-doc em andamento	Química de Produtos Naturais	5	Não	Assisti uma parte da programação ao vivo e parte posteriormente pelos links do YouTube	5		Sim	4		Sim	5	5	Preenchimento das listas de presença	Fundamental, manter em futuros eventos	Fundamental, manter em futuros eventos	Não	Não participei :(	5
2020/12/23 4:49:18 PM GMT-3	Ciências biológicas	Estudante de graduação	Bioquimica	5	Sim	Assisti uma parte da programação ao vivo e parte posteriormente pelos links do YouTube	5	O evento todo foi incrivel, mas o segundo dia foi o melhor. A professora Glória é maravilhosa.	Sim	4		Sim	4	5	Dificuldade em acessar os links do YouTube	Fundamental, manter em futuros eventos	Fundamental, manter em futuros eventos	Não	Não participei :(	3				Continuem fazendo esse trabalho incrível de vocês. ❤️
2020/12/23 4:50:06 PM GMT-3	Ciências biológicas	Doutoranda (o)	Mestrado em Imunologia	5	Sim	Assisti a programação completa ao vivo	5	Métodos de avaliação de resultados de RNAseq poderia ser um tópico de todo um terceiro dia o curso talvez, mostrando diversas formas de construção de resultados a partir de dados de sequenciamento	Sim	4	Não!	Sim	5	5	Problemas com a conexão de internet;Dificuldade em realizar doações para a campanha beneficente "Projeto X"	Fundamental, manter em futuros eventos	Fundamental, manter em futuros eventos	Não	Não participei :(	5	Não!	Evento sensacional, parabéns		Jovial, inovador e muito interativo tbm.
2020/12/23 4:55:10 PM GMT-3	Ciências biológicas	Doutora/Doutor	Genética	5	Sim	Assisti uma parte da programação ao vivo e parte posteriormente pelos links do YouTube	5		Sim	5		Não	1	5	Problemas com a conexão de internet	Fundamental, manter em futuros eventos	Fundamental, manter em futuros eventos	Sim	#TeamJaguatirica	5		Obrigado, gratidão, parabéns...		Mais vinhetas do Prof Ortega!
2020/12/23 4:55:27 PM GMT-3	Ciências biomédicas	Estudante de graduação	Biomedicina	5	Sim	Assisti a programação completa ao vivo	5		Sim	5		Sim	5	5	Dificuldade em acessar os links do YouTube	Fundamental, manter em futuros eventos	Fundamental, manter em futuros eventos	Sim	Não participei :(	5
2020/12/23 4:59:00 PM GMT-3	Enfermagem e Biotecnologia	Mestranda (o)	Biotecnologia	5	Sim	Assisti uma parte da programação ao vivo e parte posteriormente pelos links do YouTube	5		Sim	5		Sim	5	5	Dificuldade de me concentrar durante o evento	Fundamental, manter em futuros eventos	Fundamental, manter em futuros eventos	Sim	#TeamJaguatirica	5
2020/12/23 4:59:21 PM GMT-3	Ciências biológicas	Mestra/Mestre	Genética e Biologia molecular	5	Não	Assisti uma parte da programação ao vivo e parte posteriormente pelos links do YouTube	5		Sim	5		Sim	5	5	Problemas com a conexão de internet	Fundamental, manter em futuros eventos	Fundamental, manter em futuros eventos	Não	Não participei :(	5
2020/12/23 5:00:44 PM GMT-3	Ciências da computação	Mestranda (o)	Pós Graduação em Ciência de Dados	5	Sim	Assisti uma parte da programação ao vivo e parte posteriormente pelos links do YouTube	5		Não	5		Sim	5	5	Problemas com a conexão de internet	Fundamental, manter em futuros eventos	Fundamental, manter em futuros eventos	Não	Não participei :(	4
2020/12/23 5:11:29 PM GMT-3	Ciências da computação	Estudante de graduação	Técnico em informática	4	Não	Assisti uma parte da programação ao vivo e parte posteriormente pelos links do YouTube	4		Não	5		Sim	5	5	Dificuldade de me concentrar durante o evento	Fundamental, manter em futuros eventos	Fundamental, manter em futuros eventos	Não	Não participei :(	5
2020/12/23 5:11:43 PM GMT-3	Ciências exatas não computacionais	Mestranda (o)	Química	5	Sim	Assisti a programação completa ao vivo	5	Alguma aplicação de uso dos softwares e demonstração seria interessante (na prática).	Sim	5		Sim	5	5	Preenchimento das listas de presença	Fundamental, manter em futuros eventos	Fundamental, manter em futuros eventos	Não	Não participei :(	5				Evento fantástico , espero que tenha outras edições, sou apaixonado pela área.
2020/12/23 5:16:49 PM GMT-3	Ciências biológicas	Doutoranda (o)	Doutorado em Meio Ambiente e Desenvolvimento Regional	5	Sim	Assisti a programação completa ao vivo	5	Todos da organização estão de parabéns	Sim	5		Não	5	5	Acesso aos e-mails com notícias do I WOB20	Fundamental, manter em futuros eventos	Fundamental, manter em futuros eventos	Não	Não participei :(	5		Todos da organização estão de parabéns pelo evento. Foi muito boa a repercussão
2020/12/23 5:16:54 PM GMT-3	Ciências biológicas	Mestranda (o)	Bacharelado em Ciências Biológicas	5	Sim	Assisti uma parte da programação ao vivo e parte posteriormente pelos links do YouTube	5		Sim	5		Não	3	5	Nenhum dos anteriores	Fundamental, manter em futuros eventos	Fundamental, manter em futuros eventos	Não	Não participei :(	3
2020/12/23 5:18:13 PM GMT-3	Biotecnologia	Estudante de graduação	Biotecnologia	4	Sim	Assisti a programação completa ao vivo	4		Sim	4		Não	1	4	Problemas com a conexão de internet;Dificuldade em acessar os links do YouTube	Fundamental, manter em futuros eventos	Fundamental, manter em futuros eventos	Não	Não participei :(	1
2020/12/23 5:19:49 PM GMT-3	Ciências biológicas	Mestranda (o)	Ciências biológicas	5	Sim	Assisti uma parte da programação ao vivo e parte posteriormente pelos links do YouTube	5		Sim	5		Não	3	5	Nenhuma	Fundamental, manter em futuros eventos	Fundamental, manter em futuros eventos	Não	Não participei :(	5
2020/12/23 5:21:08 PM GMT-3	Ciências biológicas	Estudante de graduação	Bacharelado em Ciências Biológicas	5	Sim	Assisti uma parte da programação ao vivo e parte posteriormente pelos links do YouTube	5		Sim	5		Não	3	5	Problemas com a conexão de internet	Fundamental, manter em futuros eventos	Fundamental, manter em futuros eventos	Sim	#TeamJaguatirica	5
2020/12/23 5:24:34 PM GMT-3	Ciências biológicas	Mestranda (o)	Nutrição	4	Não	Assisti uma parte da programação ao vivo e parte posteriormente pelos links do YouTube	4		Não	3		Não	3	4	Problemas com a conexão de internet;Dificuldade de me concentrar durante o evento	Fundamental, manter em futuros eventos	Fundamental, manter em futuros eventos	Não	Não participei :(	3
2020/12/23 5:28:01 PM GMT-3	Ciências biológicas	Estudante de graduação	.	5	Sim	Assisti uma parte da programação ao vivo e parte posteriormente pelos links do YouTube	5		Sim	5		Não	5	5	Problemas com a conexão de internet	Fundamental, manter em futuros eventos	Fundamental, manter em futuros eventos	Não	Não participei :(	2		Muito boa a iniciativa de colocar um interprete de libras, esse foi o meu primeiro evento online em que presenciei isso. Arrasaram em tudo	Gostaria que as listras de frequencia permanece por mais tempo
2020/12/23 5:28:51 PM GMT-3	Ciências biológicas	Doutoranda (o)	Biólogo	5	Sim	Assisti a programação completa ao vivo	5		Sim	5		Não	4	5	Dificuldade em acessar os links do YouTube	Fundamental, manter em futuros eventos	Fundamental, manter em futuros eventos	Não	Não participei :(	4
2020/12/23 5:29:57 PM GMT-3	Biomedicina	Mestra/Mestre	Graduação	5	Sim	Assisti uma parte da programação ao vivo e parte posteriormente pelos links do YouTube	5		Sim	5		Não	5	5	Problemas com a conexão de internet;Preenchimento das listas de presença	Fundamental, manter em futuros eventos	Fundamental, manter em futuros eventos	Não	Não participei :(	4
2020/12/23 5:30:36 PM GMT-3	Ciências - Licenciatura	Estudante de graduação	Ciências - Licenciatura	5	Sim	Assisti uma parte da programação ao vivo e parte posteriormente pelos links do YouTube	5		Sim	4		Sim	3	5	Preenchimento das listas de presença;Acesso aos e-mails com notícias do I WOB20	Fundamental, manter em futuros eventos	Fundamental, manter em futuros eventos	Não	Não participei :(	3		Eu amei!! Conhecia pouca coisa da área, porém as palestras e mesas ajudaram a ter um norte de como prosseguir e me aprofundar.
2020/12/23 5:32:07 PM GMT-3	Medicina Veterinária	Doutoranda (o)	Mestrado em Medicina Veterinária	5	Não	Não assisti à programação completa, apenas assisti o que pude ver ao vivo	5	Primeiro evento de bioinformática no qual participo e gostei bastante. Principalmente por estar iniciando na área, foi muito agregador.	Não	5	Infelizmente não pude acompanhar por completo todas ao vivo. Mas a interação dos palestrantes com os alunos foi muito atenciosa.	Não	4	5	Problemas com a conexão de internet;Indisponibilidade no horário de algumas palestras e acabei não assistindo depois.	Fundamental, manter em futuros eventos	Fundamental, manter em futuros eventos	Sim	#TeamJaguatirica	5	Achei muito interessante e serve como forma de incentivo para as pessoas testarem seus conhecimentos. Eu só não consegui acessar o gabarito, o que foi pouco frustrante, já que considero importante saber onde errei e onde acertei.	Parabéns à organização. Achei um evento muito atencioso com seu público e a inclusão de intérprete de LIBRAS foi simplesmente sensacional. Todos deveriam ter essa inclusão em seus eventos. Parabéns!	No momento acredito não ter conhecimento suficiente para sugerir algo a mais.	Muito obrigada pela oportunidade. Me abriu uma porta imensa de possibilidades e foi um pontapé inicial para iniciar estudos em novas ferramentas importantes e aplicáveis na minha área. Que vocês possam agregar mais pessoas como eu.
2020/12/23 5:33:58 PM GMT-3	Ciências biológicas	Doutoranda (o)	Biólogo	5	Sim	Assisti a programação completa ao vivo	5		Sim	5		Não	4	5	Dificuldade em acessar os links do YouTube	Fundamental, manter em futuros eventos	Fundamental, manter em futuros eventos	Não	Não participei :(	4
2020/12/23 5:40:06 PM GMT-3	Ciências biológicas	Doutoranda (o)	Genética, Biodiversidade e Conservação	5	Sim	Assisti a programação completa ao vivo	5	Foi um curso excelente! Espero poder participar nos próximos!	Sim	5		Sim	5	5	Não tive problemas	Fundamental, manter em futuros eventos	Fundamental, manter em futuros eventos	Sim	#TeamJaguatirica	5	Quero participar novamente! É genial!
2020/12/23 5:40:44 PM GMT-3	Ciências biológicas	Mestranda (o)	Bacharel em Ciências Biológicas	5	Sim	Assisti a programação completa ao vivo	5		Sim	5		Não	3	5	Nenhum problema	Fundamental, manter em futuros eventos	Fundamental, manter em futuros eventos	Sim	#TeamJacaré	5		O evento foi muito interessante! Gostei muito da temática por cada dia, das mesas redondas, de ter um intérprete (fantástico!!). Vocês estão de parabéns!	Vocês poderiam sempre permitir que existisse versão online do evento. Eu sempre quis participar do CV ai em Minas, mas sempre foi complicado por financeiramente ser inviável. Tenho vários amigos que também queriam ter participado em versões anteriores mas não puderam. Ter sempre uma versão online facilitaria muito!	Foi perfeito!
2020/12/23 5:45:04 PM GMT-3	Interdisciplinar	Doutora/Doutor	Recursos Hídricos em Sistemas Agrícolas	4	Sim	Assisti uma parte da programação ao vivo e parte posteriormente pelos links do YouTube	4	não.	Sim	4	não.	Não	3	5	Problemas com a conexão de internet	Fundamental, manter em futuros eventos	Fundamental, manter em futuros eventos	Não	Não participei :(	3	Não participei.
2020/12/23 5:54:17 PM GMT-3	Farmácia	Estudante de graduação	Farmácia	5	Não	Assisti uma parte da programação ao vivo e parte posteriormente pelos links do YouTube	5		Sim	4		Sim	4	4	Problemas com a conexão de internet	Fundamental, manter em futuros eventos	Fundamental, manter em futuros eventos	Não	Não participei :(	3
2020/12/23 5:58:16 PM GMT-3	Agronomia	Graduada/Graduado	Engenheira Civil	5	Sim	Assisti uma parte da programação ao vivo e parte posteriormente pelos links do YouTube	5		Sim	4		Sim	5	5	Problemas com a conexão de internet	Fundamental, manter em futuros eventos	Fundamental, manter em futuros eventos	Não	Não participei :(	3
2020/12/23 5:59:27 PM GMT-3	Ciências biológicas	Mestranda (o)	Ciências biológicas	4	Não	Não assisti à programação completa, apenas assisti o que pude ver ao vivo	4		Não	3		Sim	5	5	Problemas com a conexão de internet;Dificuldade de me concentrar durante o evento	Fundamental, manter em futuros eventos	Fundamental, manter em futuros eventos	Não	Não participei :(	4
2020/12/23 6:00:18 PM GMT-3	Ciências biológicas	Doutoranda (o)	MESTRADO EM BIODIVERSIDADE TROPICAL	4	Sim	Assisti uma parte da programação ao vivo e parte posteriormente pelos links do YouTube	4		Sim	4		Sim	5	4	Problemas com a conexão de internet;Preenchimento das listas de presença	Fundamental, manter em futuros eventos	Foi bom, mas evitar em futuros eventos	Não	Não participei :(	3		Ótimo evento, espero que sejam feitos várias outras edições.	Cursos que atendam aos tópicos de evolução molecular
2020/12/23 6:01:38 PM GMT-3	Ciências da saúde	Estudante de graduação	Ensino médio	5	Sim	Assisti uma parte da programação ao vivo e parte posteriormente pelos links do YouTube	5		Sim	5		Sim	5	5	Problemas com a conexão de internet	Fundamental, manter em futuros eventos	Fundamental, manter em futuros eventos	Não	Não participei :(	5		Excelente evento, acessível, informativo e cheio de propósitos importantíssimos. Parabéns e obrigada por serem tão inclusivos e engajados. Espero que outros eventos sigam o exemplo da I WOB20. Abraços biosseguros a todos, bom final de ano e forças para 2021!
2020/12/23 6:05:03 PM GMT-3	Ciências biológicas	Mestranda (o)	Biotecnologia	5	Sim	Assisti a programação completa ao vivo	5		Sim	5		Sim	5	5	Dificuldade de me concentrar durante o evento	Fundamental, manter em futuros eventos	Fundamental, manter em futuros eventos	Não	Não participei :(	5
2020/12/23 6:11:36 PM GMT-3	Ciências biológicas	Pós-doc concluído	Biologia Estrutural	4	Sim	Assisti uma parte da programação ao vivo e parte posteriormente pelos links do YouTube	5	A programação foi exccelente e como podiamos assitir posteriormente foi possivel assitir quase todos os eventos do WOB20	Não	4	As mesas as vezes foram muito longas ou com muita gente	Sim	5	5	Problemas com a conexão de internet	Fundamental, manter em futuros eventos	Fundamental, manter em futuros eventos	Não	Não participei :(	3	Não participei	Evento excelente	Realizar em mais dias porem menos concentrado
2020/12/23 6:12:01 PM GMT-3	Ciências biológicas	Mestra/Mestre	Mestrado em Ensino de ciências	5	Sim	Assisti uma parte da programação ao vivo e parte posteriormente pelos links do YouTube	5		Sim	5		Não	5	5	não tive problemas	Fundamental, manter em futuros eventos	Fundamental, manter em futuros eventos	Não	Não participei :(	5
2020/12/23 6:13:00 PM GMT-3	Ciências biológicas	Estudante de graduação	Ciências Biológicas	5	Sim	Assisti uma parte da programação ao vivo e parte posteriormente pelos links do YouTube	5	Tudo incrível!	Sim	5	Muito bem organizado	Sim	5	5	Preenchimento das listas de presença	Fundamental, manter em futuros eventos	Fundamental, manter em futuros eventos	Não	Não participei :(	3	Não participei	Organizado, claro, muito esclarecedor, eficiente e inclusivo	Mais vagas!
2020/12/23 6:13:06 PM GMT-3	Ciências biológicas	Estudante de graduação	Biomedicina	5	Sim	Assisti a programação completa ao vivo	5		Sim	5		Sim	5	5	Problemas com a conexão de internet	Fundamental, manter em futuros eventos	Fundamental, manter em futuros eventos	Não	Não participei :(	5
2020/12/23 6:14:17 PM GMT-3	Biomedicina	Mestra/Mestre	Genética e Biologia Molecular	4	Sim	Assisti uma parte da programação ao vivo e parte posteriormente pelos links do YouTube	4		Sim	4		Sim	4	4	Acesso aos e-mails com notícias do I WOB20	Fundamental, manter em futuros eventos	Fundamental, manter em futuros eventos	Não	Não participei :(	3
2020/12/23 6:15:25 PM GMT-3	Interdisciplinar	Doutora/Doutor	Neurociência	5	Sim	Assisti a programação completa ao vivo	5		Não	5		Sim	5	5	Problemas com a conexão de internet	Fundamental, manter em futuros eventos	Fundamental, manter em futuros eventos	Não	Não participei :(	3		Excelente iniciativa		Muito obrigado pela oportunidade
2020/12/23 6:15:28 PM GMT-3	Ciências biológicas	Graduada/Graduado	Ciências Biológicas	5	Sim	Assisti uma parte da programação ao vivo e parte posteriormente pelos links do YouTube	5		Não	5		Não	3	5	Nenhuma	Fundamental, manter em futuros eventos	Fundamental, manter em futuros eventos	Sim	#TeamJaguatirica	5		Em meus quatro anos de graduação nunca participei de um evento tão rico em informações, tão bem elaborado e com tantos profissionais incríveis. A equipe organizadora está de parabéns!	Que o evento possa ser sempre em formato online para que o máximo de pessoas possam participar.	Evento incrível. Não tinha conhecimento nenhum da bioinformática e vocês abriram meu horizonte. Agora busco oportunidades para ingressar nessa área.
2020/12/23 6:18:39 PM GMT-3	Ciências biológicas	Mestranda (o)	Medicina Veterinária	5	Sim	Assisti a programação completa ao vivo	5		Sim	5		Não	3	5	Problemas com a conexão de internet	Fundamental, manter em futuros eventos	Fundamental, manter em futuros eventos	Sim	#TeamCapivara	3
2020/12/23 6:18:59 PM GMT-3	Ciências biológicas	Mestranda (o)	Ciências Biológicas	5	Não	Assisti uma parte da programação ao vivo e parte posteriormente pelos links do YouTube	4		Não	4		Não	3	5	nenhuma dificuldade	Fundamental, manter em futuros eventos	Fundamental, manter em futuros eventos	Não	Não participei :(	3		Parabéns pela iniciativa, bioinformática é uma área difícil e que assusta muita gente. Ao realizar eventos como o de vocês, as pessoas passam a ter uma idéia melhor da área e acho que se assustam menos porque atribuem um novo significado à área e isso é bem importante. Além disso, parabéns pela iniciativa de deixar as palestras gravadas no YouTube. Nem todo evento faz isso, mas faz uma diferença …	Seria interessante ter palestras um pouco mais aprofundadas na metodologia. Pra uma primeira edição do evento o conteúdo foi ótimo, mas isso significa que foi bem básico. Para edições futuras, seria interessante ter temas que aprofundem mais na área.
2020/12/23 6:20:08 PM GMT-3	Ciências biológicas	Estudante de graduação	Biotecnologia	4	Sim	Assisti uma parte da programação ao vivo e parte posteriormente pelos links do YouTube	4		Sim	4		Sim	5	5	Problemas com a conexão de internet;Dificuldade de me concentrar durante o evento	Fundamental, manter em futuros eventos	Fundamental, manter em futuros eventos	Não	Não participei :(	5
2020/12/23 6:20:58 PM GMT-3	Ciências biológicas	Graduada/Graduado	Ciências Biológicas	5	Sim	Assisti uma parte da programação ao vivo e parte posteriormente pelos links do YouTube	5		Não	4		Não	3	5	Nenhum	Fundamental, manter em futuros eventos	Fundamental, manter em futuros eventos	Sim	#TeamJaguatirica	5		Em meus quatro anos de graduação nunca participei de um evento tão rico em informações quanto esse. Os profissionais foram incríveis e só tenho elogios à equipe organizadora do evento.	Manter o evento online para que mais pessoas possam participar.	Eu não tinha conhecimento algum sobre a bioinformática. Vocês abriram meu horizonte, me apaixonei e agora me encontro a procura de me inserir na área.
2020/12/23 6:22:22 PM GMT-3	Ciências biológicas	Graduada/Graduado	Biomedicina	5	Sim	Assisti uma parte da programação ao vivo e parte posteriormente pelos links do YouTube	5	Otima didatica dos apresentadores	Não	1		Sim	5	5	Problemas com a conexão de internet	Fundamental, manter em futuros eventos	Fundamental, manter em futuros eventos	Não	Não participei :(	1
2020/12/23 6:25:54 PM GMT-3	Ensino médio	Estudante de ensino médio	1° Ano	5	Não	Não assisti à programação completa, apenas assisti o que pude ver ao vivo	4		Não	5		Não	1	4	Dificuldade de me concentrar durante o evento	Fundamental, manter em futuros eventos	Fundamental, manter em futuros eventos	Não	Não participei :(	3		Eu gostei muito do fato de ter intérpretes de libras, dos convidados, do formato online, dos sorteios, em geral tudo foi muito bom!!	Melhorar a organização do tempo!! Infelizmente por causa de que haviam muitas perguntas algumas palestras excederam o tempo!!	Muito obrigada por deixar pessoas mais novas que estão no ensino médio (eu) participar desse evento!! Achei incrível a iniciativa da campanha beneficente para ajudar meninas com menos condições porque é muito importante as crianças terem um incentivo e inspirações desde pequenas, principalmente quem tem menos condições!!! Achei muito legal a ideia dos sorteios e da taça!! Espero participar outros…
2020/12/23 6:29:08 PM GMT-3	Biotecnologia	Mestranda (o)	Mestrado em Microbiologia	5	Sim	Assisti a programação completa ao vivo	5		Sim	5		Sim	5	5	Problemas com a conexão de internet	Fundamental, manter em futuros eventos	Fundamental, manter em futuros eventos	Não	Não participei :(	3
2020/12/23 6:29:45 PM GMT-3	Interdisciplinar	Mestranda (o)	Bacharelado Interdisciplinar em Ciência e Tecnologia do Mar	5	Sim	Assisti a programação completa ao vivo	5		Sim	5		Não	1	5	nenhuma!	Fundamental, manter em futuros eventos	Fundamental, manter em futuros eventos	Não	Não participei :(	3
2020/12/23 6:31:12 PM GMT-3	Ensino médio	Estudante de ensino médio	1° Ano	5	Não	Não assisti à programação completa, apenas assisti o que pude ver ao vivo	4		Não	5		Não	1	4	Dificuldade de me concentrar durante o evento	Fundamental, manter em futuros eventos	Fundamental, manter em futuros eventos	Não	Não participei :(	3
2020/12/23 6:31:16 PM GMT-3	Biomedicina	Mestranda (o)	Biologia Celular e do Desenvolvimento	5	Sim	Assisti uma parte da programação ao vivo e parte posteriormente pelos links do YouTube	5		Sim	5		Não	2	5	Problemas com a conexão de internet	Fundamental, manter em futuros eventos	Fundamental, manter em futuros eventos	Sim	#TeamJaguatirica	5
2020/12/23 6:32:24 PM GMT-3	Ciências agrárias	Graduada/Graduado	Microbiologia - Pós Graduação	5	Sim	Assisti uma parte da programação ao vivo e parte posteriormente pelos links do YouTube	5		Não	4		Não	3	5	Dificuldade de me concentrar durante o evento	Fundamental, manter em futuros eventos	Fundamental, manter em futuros eventos	Não	Não participei :(	3
2020/12/23 6:37:24 PM GMT-3	Interdisciplinar	Estudante de graduação	ensino medio	5	Sim	Assisti uma parte da programação ao vivo e parte posteriormente pelos links do YouTube	5		Sim	5		Sim	5	5	Acesso aos e-mails com notícias do I WOB20	Fundamental, manter em futuros eventos	Fundamental, manter em futuros eventos	Não	Não participei :(	5
2020/12/23 6:40:05 PM GMT-3	Interdisciplinar	Doutoranda (o)	Biociências e Biotecnologia	4	Sim	Assisti uma parte da programação ao vivo e parte posteriormente pelos links do YouTube	5		Não	5		Sim	5	5	Preenchimento das listas de presença	Fundamental, manter em futuros eventos	Fundamental, manter em futuros eventos	Não	Não participei :(	3		Achei extremamente interessante tanto as discussões quanto os temas, meus parabéns
2020/12/23 6:42:19 PM GMT-3	Ciências biológicas	Estudante de graduação	Ciências biológicas	5	Não	Assisti uma parte da programação ao vivo e parte posteriormente pelos links do YouTube	5	Adorei as palestras e o workshop todo foi muito bem feito	Não	5		Sim	5	5	Problemas com a conexão de internet	Fundamental, manter em futuros eventos	Fundamental, manter em futuros eventos	Sim	#TeamCapivara	5	Achei super criativo, adorei a ideia e o modo como foi feito	O workshop todo foi maravilhoso, palestras bem feitas com ótimos profissionais e tudo muito criativo.		Com certeza participarei das próximas edições
2020/12/23 6:44:57 PM GMT-3	Ciências biológicas	Doutoranda (o)	Bioinformática	5	Sim	Assisti a programação completa ao vivo	5		Sim	5		Sim	5	5	Nenhum problema	Fundamental, manter em futuros eventos	Fundamental, manter em futuros eventos	Não	Não participei :(	5
2020/12/23 6:46:28 PM GMT-3	Ciências biológicas	Doutoranda (o)	Mestre	5	Sim	Assisti a programação completa ao vivo	5	Não! Vcs foram fenomenais!	Sim	5	Não	Sim	5	5	Problemas com a conexão de internet	Fundamental, manter em futuros eventos	Fundamental, manter em futuros eventos	Não	Não participei :(	1	Não	Evento muito bem organizado!	Não tenho	Aprendi muito!
2020/12/23 6:48:06 PM GMT-3	Ciências biológicas	Estudante de graduação	Biomedicina	5	Sim	Assisti a programação completa ao vivo	5	Otimo	Sim	5		Sim	5	5	Dificuldade de me concentrar durante o evento	Fundamental, manter em futuros eventos	Fundamental, manter em futuros eventos	Não	Não participei :(	5
2020/12/23 6:50:24 PM GMT-3	Ciências biológicas	Estudante de graduação	Biomedicina	5	Sim	Assisti a programação completa ao vivo	5		Sim	5		Sim	5	5	Dificuldade de me concentrar durante o evento	Fundamental, manter em futuros eventos	Fundamental, manter em futuros eventos	Sim	#TeamJaguatirica	5
2020/12/23 6:50:50 PM GMT-3	Ciências biológicas	Estudante de graduação	Biomedicina	5	Sim	Assisti a programação completa ao vivo	5		Sim	5		Sim	5	5	Dificuldade de me concentrar durante o evento	Fundamental, manter em futuros eventos	Fundamental, manter em futuros eventos	Sim	#TeamJaguatirica	5
2020/12/23 6:51:02 PM GMT-3	Ciências biológicas	Estudante de graduação	Biomedicina	5	Sim	Assisti a programação completa ao vivo	5		Sim	5		Sim	5	5	Dificuldade de me concentrar durante o evento	Fundamental, manter em futuros eventos	Fundamental, manter em futuros eventos	Sim	#TeamJaguatirica	5
2020/12/23 6:53:14 PM GMT-3	Biotecnologia	Estudante de graduação	Técnica em Informática	5	Sim	Assisti a programação completa ao vivo	5		Não	5		Não	5	5	Dificuldade de me concentrar durante o evento	Fundamental, manter em futuros eventos	Fundamental, manter em futuros eventos	Sim	#TeamJacaré	2			Parabéns pelo excelente evento feito com muita qualidade, mas gostaria de deixar um ponto construtivo: por ser um evento online estamos sujeitos a muitas distrações e as telas dos aparelhos acabam por cansar muito a visão, então seria interessante haver algum intervalo entre as palestras ou ao menos diminuir o n° delas por dia, pois ficou bastante cansativo, tirando isso foi uma ótima experiência…
2020/12/23 6:55:06 PM GMT-3	Ciências da computação	Doutoranda (o)	Genética	5	Sim	Assisti uma parte da programação ao vivo e parte posteriormente pelos links do YouTube	5		Sim	4		Não	1	5	Nao tive	Fundamental, manter em futuros eventos	Fundamental, manter em futuros eventos	Não	Não participei :(	1
2020/12/23 6:56:06 PM GMT-3	Ciências biológicas	Estudante de graduação	Biomedicina	5	Sim	Assisti uma parte da programação ao vivo e parte posteriormente pelos links do YouTube	5		Não	3		Não	3	4	Problemas com a conexão de internet	Fundamental, manter em futuros eventos	Fundamental, manter em futuros eventos	Não	Não participei :(	3
2020/12/23 6:57:46 PM GMT-3	Ciências da Computação e Biotecnologia	Mestranda (o)	Biotecnologia	5	Sim	Assisti a programação completa ao vivo	5		Sim	5		Não	3	5	Acesso aos e-mails com notícias do I WOB20	Fundamental, manter em futuros eventos	Fundamental, manter em futuros eventos	Sim	#TeamCobra	4
2020/12/23 7:00:26 PM GMT-3	Ciências biológicas	Mestranda (o)	Inovação Terapêutica	5	Sim	Assisti a programação completa ao vivo	5		Sim	5		Sim	5	5	Problemas com a conexão de internet	Fundamental, manter em futuros eventos	Fundamental, manter em futuros eventos	Sim	#TeamJaguatirica	5
2020/12/23 7:01:03 PM GMT-3	Ciências biológicas	Doutoranda (o)	Mestre	5	Sim	Assisti a programação completa ao vivo	5	Não. Somente elogios	Sim	5	Fenomenais.	Sim	5	5	Problemas com a conexão de internet	Fundamental, manter em futuros eventos	Fundamental, manter em futuros eventos	Não	Não participei :(	3	Nao	Evento fenomenal	Não tenho.	Aprendi muito.
2020/12/23 7:01:10 PM GMT-3	Ciências biológicas	Doutoranda (o)	Mestre	5	Sim	Assisti a programação completa ao vivo	5	Não. Somente elogios	Sim	5	Fenomenais.	Sim	5	5	Problemas com a conexão de internet	Fundamental, manter em futuros eventos	Fundamental, manter em futuros eventos	Não	Não participei :(	3	Nao	Evento fenomenal	Não tenho.	Aprendi muito.
2020/12/23 7:02:22 PM GMT-3	Ciências biológicas	Estudante de graduação	Biomedicina	5	Sim	Assisti uma parte da programação ao vivo e parte posteriormente pelos links do YouTube	5		Não	4		Não	3	4	Problemas com a conexão de internet	Fundamental, manter em futuros eventos	Fundamental, manter em futuros eventos	Não	Não participei :(	3
2020/12/23 7:03:52 PM GMT-3	Medicina Veterinária	Estudante de graduação	Medicina Veterinária	5	Sim	Assisti uma parte da programação ao vivo e parte posteriormente pelos links do YouTube	5		Sim	5		Sim	5	5	Nenhum problema	Fundamental, manter em futuros eventos	Fundamental, manter em futuros eventos	Sim	#TeamJaguatirica	5
2020/12/23 7:03:57 PM GMT-3	Biotecnologia	Estudante de graduação	Técnica de Informática	5	Sim	Assisti a programação completa ao vivo	5		Sim	5		Não	2	5	Dificuldade de me concentrar durante o evento	Fundamental, manter em futuros eventos	Fundamental, manter em futuros eventos	Sim	#TeamJacaré	5			Parabéns pelo excelente evento feito com muita qualidade, mas gostaria de deixar um ponto construtivo: por ser um evento online estamos sujeitos a muitas distrações e as telas dos aparelhos acabam por cansar muito a visão, então seria interessante haver algum intervalo entre as palestras ou ao menos diminuir o n° delas por dia, pois ficou bastante cansativo, tirando isso foi uma ótima experiência…
2020/12/23 7:08:18 PM GMT-3	Ciências humanas	Estudante de graduação	Ciências sociais	4	Não	Assisti uma parte da programação ao vivo e parte posteriormente pelos links do YouTube	4		Sim	4		Não	4	4	Problemas com a conexão de internet	Fundamental, manter em futuros eventos	Fundamental, manter em futuros eventos	Sim	Não participei :(	4
2020/12/23 7:09:21 PM GMT-3	Engenharia Bioquímica	Estudante de graduação	Engenharia Bioquímica	5	Sim	Assisti a programação completa ao vivo	5	Nada a declarar.	Sim	5	Nada a declarar.	Não	5	5	Dificuldade de me concentrar durante o evento	Fundamental, manter em futuros eventos	Fundamental, manter em futuros eventos	Não	Não participei :(	5	Nada a declarar.	Muito bom!	Nada a declarar.	Obrigado por compartilhar conhecimentos.
2020/12/23 7:09:52 PM GMT-3	Ciências biológicas	Doutoranda (o)	Ciências Biológicas	3	Não	Assisti uma parte da programação ao vivo e parte posteriormente pelos links do YouTube	4	Achei os dias muito longos, alguns palestrantes não respeitavam o tempo, o que deixava com pouco tempo para interações, atrasava toda a programação e, ao final, me impediram de assistir todo o evento, pois ultrapassava em muito o tempo que eh tinha disponível.	Não	3	Não consegui seguir muito as mesas redondas por causa do horário.	Não	3	3	Dificuldade de me concentrar durante o evento	Fundamental, manter em futuros eventos	Fundamental, manter em futuros eventos	Não	Não participei :(	3		Organização muito boa! Temas cobrindo as principais áreas. Palestras interessantes.	Acho que esses eventos online precisam ter horário melhor fixados e periodos mais curtos. Os dias ficavam muito longos e cansativos. É preciso algum jeito também de restringir os palestrantes dentro do tempo (p.e. a palestra do Tripanosoma, por mais interessante, foi eterna).	Achei a iniciativa muito bacana, formato, conteúdo. Os problemas são normais em novas plataformas e formatos! Tenho certeza que nos próximos podem ser acertados! Parabéns pra equipe! E boas festas! Abs
2020/12/23 7:14:13 PM GMT-3	Ciências biológicas	Estudante de graduação	Curso sobre taxoplamose	5	Não	Assisti uma parte da programação ao vivo e parte posteriormente pelos links do YouTube	5	Palestras muito boas com ótimos temas	Não	4	Não pude assistir as mesas redondas mas aposto que foram ótimas	Sim	5	5	Problemas com a conexão de internet	Fundamental, manter em futuros eventos	Fundamental, manter em futuros eventos	Não	Não participei :(	3	Não participei não tenho como comentar sobre , boa idea	Boa iniciativa espero que tenha outras	Por mim tudo muito bem organizado não precisa de melhorias	Gostou muito das plalestas nunca pensei que computação tinha relação com biologia
2020/12/23 7:15:35 PM GMT-3	Ciências biológicas	Pós-doc em andamento	Genética, conservação e biologia evolutiva	5	Não	Não assisti à programação completa, apenas assisti o que pude ver ao vivo	5		Não	4		Sim	5	5	Problemas com a conexão de internet;Dificuldade de me concentrar durante o evento	Fundamental, manter em futuros eventos	Fundamental, manter em futuros eventos	Não	Não participei :(	3
2020/12/23 7:15:57 PM GMT-3	Ciências biológicas	Doutoranda (o)	Mestrado em Bioinformática	5	Não	Não assisti à programação completa, apenas assisti o que pude ver ao vivo	5		Não	3		Sim	5	5	Dificuldade de me concentrar durante o evento;Preenchimento das listas de presença	Fundamental, manter em futuros eventos	Fundamental, manter em futuros eventos	Sim	#TeamJaguatirica	5
2020/12/23 7:17:30 PM GMT-3	Ciências biológicas	Estudante de graduação		5	Sim	Assisti a programação completa ao vivo	5		Sim	5		Não	3	5	Problemas com a conexão de internet	Fundamental, manter em futuros eventos	Fundamental, manter em futuros eventos	Não	Não participei :(	3
2020/12/23 7:17:55 PM GMT-3	Ciências biológicas	Estudante de graduação	Ciências Biológicas	5	Sim	Assisti a programação completa ao vivo	5		Sim	5		Sim	5	5	Acesso aos e-mails com notícias do I WOB20	Fundamental, manter em futuros eventos	Fundamental, manter em futuros eventos	Não	Não participei :(	5
2020/12/23 7:18:55 PM GMT-3	Ciências biológicas	Pós-doc em andamento	Doutorado em Ciências	4	Sim	Assisti uma parte da programação ao vivo e parte posteriormente pelos links do YouTube	5		Sim	5		Sim	5	5	Problemas com a conexão de internet	Fundamental, manter em futuros eventos	Fundamental, manter em futuros eventos	Não	Não participei :(	3
2020/12/23 7:19:13 PM GMT-3	Ciências biológicas	Mestranda (o)	Programa de pós-graduação em biotecnologia	4	Não	Não assisti à programação completa, apenas assisti o que pude ver ao vivo	4		Não	4		Não	1	3	Preenchimento das listas de presença	Fundamental, manter em futuros eventos	Fundamental, manter em futuros eventos	Não	#TeamCapivara	1
2020/12/23 7:24:44 PM GMT-3	Ciências biológicas	Estudante de graduação	Biomedicina	5	Sim	Assisti a programação completa ao vivo	5		Sim	5		Sim	5	5	Dificuldade de me concentrar durante o evento	Fundamental, manter em futuros eventos	Fundamental, manter em futuros eventos	Sim	#TeamJaguatirica	5
2020/12/23 7:27:41 PM GMT-3	Ciências biológicas	Estudante de graduação	Biomedicina	5	Sim	Assisti uma parte da programação ao vivo e parte posteriormente pelos links do YouTube	5		Sim	5		Sim	5	5	Problemas com a conexão de internet;Dificuldade de me concentrar durante o evento	Fundamental, manter em futuros eventos	Fundamental, manter em futuros eventos	Não	Não participei :(	5
2020/12/23 7:28:11 PM GMT-3	Ciências biológicas	Estudante de graduação	Biomedicina	5	Sim	Assisti uma parte da programação ao vivo e parte posteriormente pelos links do YouTube	5		Não	4		Não	1	5	Dificuldade de me concentrar durante o evento	Fundamental, manter em futuros eventos	Fundamental, manter em futuros eventos	Não	Não participei :(	5
2020/12/23 7:28:47 PM GMT-3	Ciências biológicas	Doutoranda (o)	Bioquímica e Biologia Molecular	5	Sim	Assisti a programação completa ao vivo	5		Não	4		Não	5	5	Acesso aos e-mails com notícias do I WOB20	Fundamental, manter em futuros eventos	Fundamental, manter em futuros eventos	Não	Não participei :(	3		Parabéns a todos os envolvidos! Os temas foram muito relevantes e atuais! Façam mais eventos como este! Acessibilidade é a palavra!		Feliz natal! Deus abençoe vocês!
2020/12/23 7:28:52 PM GMT-3	Medicina Veterinária	Doutora/Doutor	Zootecnia	4	Não	Não assisti à programação completa, apenas assisti o que pude ver ao vivo	4		Não	3		Sim	4	4	Dificuldade em acessar os links do YouTube;Dificuldade de me concentrar durante o evento	Fundamental, manter em futuros eventos	Fundamental, manter em futuros eventos	Não	Não participei :(	3
2020/12/23 7:29:53 PM GMT-3	Biotecnologia	Estudante de graduação	Biotecnologia	5	Sim	Assisti a programação completa ao vivo	5		Sim	5		Sim	5	5	Problemas com a conexão de internet	Fundamental, manter em futuros eventos	Fundamental, manter em futuros eventos	Não	Não participei :(	3
2020/12/23 7:37:49 PM GMT-3	Engenharia de Computação	Estudante de graduação	Ensino Médio	5	Não	Não assisti à programação completa, apenas assisti o que pude ver ao vivo	5		Sim	5		Não	3	5	Dificuldade de me concentrar durante o evento	Fundamental, manter em futuros eventos	Fundamental, manter em futuros eventos	Não	Não participei :(	3		Excelente evento! Organização impecável e conteúdo de alta qualidade
2020/12/23 7:40:20 PM GMT-3	Ciências biológicas	Estudante de graduação	Biomedicina	5	Sim	Assisti a programação completa ao vivo	5		Sim	5		Sim	5	5	Acesso aos e-mails com notícias do I WOB20	Fundamental, manter em futuros eventos	Fundamental, manter em futuros eventos	Não	Não participei :(	5
2020/12/23 7:40:44 PM GMT-3	Enfermagem	Mestranda (o)	Graduação em Enfermagem	5	Sim	Assisti uma parte da programação ao vivo e parte posteriormente pelos links do YouTube	5		Sim	5		Sim	5	5	Problemas com a conexão de internet	Fundamental, manter em futuros eventos	Fundamental, manter em futuros eventos	Não	Não participei :(	5		Estou muito feliz e satisfeita por ter feito parde de um evento tão incrivel!! Aguardo ansiosa pelo #WOB21
2020/12/23 7:40:59 PM GMT-3	Ciências biológicas	Graduada/Graduado	Biomedicina	5	Não	Assisti a programação completa pelas gravações no YouTube	5		Não	5		Sim	5	5	Problemas com a conexão de internet	Fundamental, manter em futuros eventos	Fundamental, manter em futuros eventos	Não	Não participei :(	5
2020/12/23 7:42:53 PM GMT-3	Ciências exatas não computacionais	Mestranda (o)	Química	5	Sim	Assisti a programação completa ao vivo	5	Sugestão fazer sorteios de livros na próxima edição.	Sim	5	Foi excelente o bate-papo das mesas-redondas.	Sim	5	5	Problemas com a conexão de internet;Dificuldade de me concentrar durante o evento	Fundamental, manter em futuros eventos	Fundamental, manter em futuros eventos	Sim	#TeamCapivara	5
2020/12/23 7:44:40 PM GMT-3	Ciências exatas não computacionais	Estudante de ensino técnico	Técnico em Química	5	Sim	Assisti uma parte da programação ao vivo e parte posteriormente pelos links do YouTube	5		Não	3		Sim	4	5	Dificuldade em realizar doações para a campanha beneficente "Projeto X"	Fundamental, manter em futuros eventos	Fundamental, manter em futuros eventos	Não	Não participei :(	3
2020/12/23 7:46:30 PM GMT-3	Ciências biológicas	Doutoranda (o)	Mestrado em Biologia Funcional e Molecular	4	Não	Não assisti à programação completa, apenas assisti o que pude ver ao vivo	4		Não	5		Sim	5	5	Dificuldade de me concentrar durante o evento;Acesso aos e-mails com notícias do I WOB20	Fundamental, manter em futuros eventos	Fundamental, manter em futuros eventos	Sim	#TeamCapivara	3	Não vi quem foi a vencedora e não achei no site. Mas seria legal ter enviado um e-mail com o resultado. Caso tenha sido enviado, eu não recebi :(
2020/12/23 7:54:33 PM GMT-3	Ciências biológicas	Mestranda (o)	Ciências Biológicas	5	Não	Assisti uma parte da programação ao vivo e parte posteriormente pelos links do YouTube	5		Não	4		Sim	4	5	Dificuldade de me concentrar durante o evento	Fundamental, manter em futuros eventos	Fundamental, manter em futuros eventos	Não	Não participei :(	3		Parabéns ao PPG e à comissão organizadora, seus eventos são sensacionais
2020/12/23 7:56:34 PM GMT-3	Ciências biológicas	Doutoranda (o)	Mestre em Bioquímica e Biologia Molecular	5	Sim	Assisti a programação completa ao vivo	5		Sim	5		Sim	5	5	Problemas com a conexão de internet	Fundamental, manter em futuros eventos	Fundamental, manter em futuros eventos	Não	Não participei :(	5		O evento online foi uma ótima iniciativa e oportunidade de aprendizagem, pois ampliou a possibilidade de participação daqueles discentes que não teriam condições financeiras para um evento presencial. A iniciativa da acessibilidade é extremamente importante, mostrando que a inclusão foi uma preocupação da organização.	Sugiro duas edições anuais (uma online e uma presencial) ou uma única edição (simultaneamente online e presencial).	Parabenizo a todos envolvidos na organização, aos interprétes de Libras, a UFMG e aos palestrantes que dedicaram um pouco do seu tempo para compartilhar o seu conhecimento e ajudar na formação/qualificação de discentes.
2020/12/23 7:58:27 PM GMT-3	Ciências biológicas	Mestra/Mestre	Mestrado em ciencias biologicas (zoologia)	4	Sim	Assisti a programação completa ao vivo	4		Sim	4		Sim	4	4	Problemas com a conexão de internet	Fundamental, manter em futuros eventos	Fundamental, manter em futuros eventos	Sim	#TeamJaguatirica	4
2020/12/23 8:00:05 PM GMT-3	Ciências biológicas	Doutora/Doutor	Genética e melhoramento de plantas	5	Sim	Assisti uma parte da programação ao vivo e parte posteriormente pelos links do YouTube	5		Sim	5		Sim	5	5	Problemas com a conexão de internet	Fundamental, manter em futuros eventos	Fundamental, manter em futuros eventos	Não	Não participei :(	3
2020/12/23 8:03:18 PM GMT-3	Ciências biológicas	Doutoranda (o)	Mestre em Bioquímica e Biologia Molecular	5	Sim	Assisti a programação completa ao vivo	5		Sim	5		Sim	5	5	Problemas com a conexão de internet	Fundamental, manter em futuros eventos	Fundamental, manter em futuros eventos	Não	Não participei :(	5
2020/12/23 8:12:56 PM GMT-3	Ciências biológicas	Doutoranda (o)	Enfermagem - graduação	5	Sim	Assisti uma parte da programação ao vivo e parte posteriormente pelos links do YouTube	5	Curso espetacular, palestras muitos boas.	Sim	5		Não	5	5	Preenchimento das listas de presença	Fundamental, manter em futuros eventos	Fundamental, manter em futuros eventos	Sim	#TeamCapivara	5		Curso espetacular, recomendo demais
2020/12/23 8:18:43 PM GMT-3	Ciências da Saúde	Doutoranda (o)	Mestrado em Clínica Odontológica	5	Sim	Assisti uma parte da programação ao vivo e parte posteriormente pelos links do YouTube	5		Sim	5		Sim	5	5	Dificuldade de me concentrar durante o evento	Fundamental, manter em futuros eventos	Fundamental, manter em futuros eventos	Não	Não participei :(	3
2020/12/23 8:22:31 PM GMT-3	Ciências biológicas	Estudante de graduação	.	4	Sim	Assisti uma parte da programação ao vivo e parte posteriormente pelos links do YouTube	4		Sim	4		Sim	4	4	Dificuldade de me concentrar durante o evento	Fundamental, manter em futuros eventos	Fundamental, manter em futuros eventos	Não	Não participei :(	3
2020/12/23 8:22:59 PM GMT-3	Ciências biológicas	Mestranda (o)	Biotecnologia e Bioprocessos UFRJ	5	Sim	Assisti a programação completa ao vivo	5		Sim	4		Sim	5	4	Problemas com a conexão de internet;Dificuldade em acessar os links do YouTube;Preenchimento das listas de presença	Fundamental, manter em futuros eventos	Fundamental, manter em futuros eventos	Não	Não participei :(	4
2020/12/23 8:25:35 PM GMT-3	Ciências biológicas	Doutoranda (o)	Mestre	5	Sim	Assisti a programação completa ao vivo	5		Sim	5		Sim	5	5	não houve nenhuma dificuldade	Fundamental, manter em futuros eventos	Fundamental, manter em futuros eventos	Não	Não participei :(	3		O evento foi muito bom e as apresentações foram relevantes. Manter a opção de ativar calendário é importante para termos o alerta de lembrete do evento no próprio celular.
2020/12/23 8:26:27 PM GMT-3	Pretendo cursar ciências biológicas	Estudante de ensino técnico	Análises Clínicas	5	Sim	Assisti a programação completa ao vivo	5		Sim	5		Não	1	5	Problemas com a conexão de internet	Fundamental, manter em futuros eventos	Fundamental, manter em futuros eventos	Não	Não participei :(	4				Adorei a oportunidade de entrar em contato com a bioinformática tão cedo. Muito importante esse tipo de evento. Parabéns!
2020/12/23 8:27:24 PM GMT-3	Ciências biológicas	Pós-doc em andamento	Zoologia	5	Sim	Assisti uma parte da programação ao vivo e parte posteriormente pelos links do YouTube	5	----	Não	4		Não	5	5	Preenchimento das listas de presença	Fundamental, manter em futuros eventos	Fundamental, manter em futuros eventos	Não	Não participei :(	5		Evento muito enriquecedor	mais minicursos
2020/12/23 8:28:18 PM GMT-3	Ciências biológicas	Doutoranda (o)	Mestrado em Análises Clínicas	4	Sim	Assisti uma parte da programação ao vivo e parte posteriormente pelos links do YouTube	4		Sim	4		Sim	4	4	Problemas com a conexão de internet	Fundamental, manter em futuros eventos	Fundamental, manter em futuros eventos	Sim	#TeamJaguatirica	5		Excelente iniciativa	Buscar abordar áreas mais específicas em horários diversos, para assim ser possível tirar dúvidas.	Continuem com esta iniciativa.
2020/12/23 8:31:12 PM GMT-3	Ciências biológicas	Graduada/Graduado	Biomedicina	5	Sim	Assisti uma parte da programação ao vivo e parte posteriormente pelos links do YouTube	5		Sim	5		Sim	5	5	Acesso aos e-mails com notícias do I WOB20	Fundamental, manter em futuros eventos	Fundamental, manter em futuros eventos	Não	Não participei :(	5
2020/12/23 8:35:26 PM GMT-3	Interdisciplinar	Estudante de graduação	Biotecnologia	5	Sim	Assisti a programação completa ao vivo	5		Sim	5		Não	2	5	Problemas com a conexão de internet;Dificuldade de me concentrar durante o evento	Fundamental, manter em futuros eventos	Fundamental, manter em futuros eventos	Sim	#TeamCobra	5		Excelente evento. Parabéns pela organização!
2020/12/23 8:35:47 PM GMT-3	Ciências biológicas	Doutoranda (o)	Mestre em Genética e Melhoramento de Plantas	5	Sim	Assisti a programação completa ao vivo	5		Sim	5		Não	3	5	Problemas com a conexão de internet	Fundamental, manter em futuros eventos	Fundamental, manter em futuros eventos	Não	Não participei :(	1		Foi um ótimo evento! Esperando os próximos
2020/12/23 8:42:42 PM GMT-3	Ciências biológicas	Graduada/Graduado	Biologia Molecular e Genética em Ciências da Saúde	5	Sim	Assisti uma parte da programação ao vivo e parte posteriormente pelos links do YouTube	5		Sim	5		Sim	5	5	Dificuldade em assistir a todas as palestras ao vivo, sendo muito importante o fato delas ficarem gravadas para assistir posteriormente.	Fundamental, manter em futuros eventos	Fundamental, manter em futuros eventos	Não	Não participei :(	5		Toda equipe de organização e palestrantes estão de parabéns! Foi um evento maravilhoso, ansiosa para o evento do ano que vem!
2020/12/23 8:44:07 PM GMT-3	Ciências biológicas	Doutoranda (o)	Microbiologia	5	Sim	Assisti a programação completa ao vivo	5		Sim	5		Sim	5	5	Não tive nenhuma dificuldade	Fundamental, manter em futuros eventos	Fundamental, manter em futuros eventos	Não	Não participei :(	5
2020/12/23 8:55:45 PM GMT-3	Ciências biológicas	Mestranda (o)	Ciências biológicas	4	Sim	Assisti a programação completa pelas gravações no YouTube	5		Não	4		Não	3	5	Problemas com a conexão de internet;Dificuldade de me concentrar durante o evento	Fundamental, manter em futuros eventos	Fundamental, manter em futuros eventos	Não	Não participei :(	3
2020/12/23 9:05:13 PM GMT-3	Ciências da computação	Mestra/Mestre	Mestre em Educação	5	Sim	Assisti uma parte da programação ao vivo e parte posteriormente pelos links do YouTube	5		Não	5		Não	3	5	Dificuldade de me concentrar durante o evento	Fundamental, manter em futuros eventos	Fundamental, manter em futuros eventos	Sim	#TeamCapivara	5
2020/12/23 9:08:13 PM GMT-3	Ciências biológicas	Estudante de graduação	Ensino Médio	5	Sim	Assisti uma parte da programação ao vivo e parte posteriormente pelos links do YouTube	5	Quero parabenizar a equipe por terem sido inteligentes nas escolhas dos palestrantes e temas. Foi incrivel.	Sim	4		Não	3	5	ergonomia	Fundamental, manter em futuros eventos	Fundamental, manter em futuros eventos	Não	Não participei :(	3		Mais uma vez parabenizar a equipe e que este seja mais um de vários outro eventos.	Fazer o evento presencial quando o retorno for autorizado e a situação de saúde publica for normalizada.
2020/12/23 9:11:09 PM GMT-3	Ciências biológicas	Doutoranda (o)	genética	5	Não	Assisti uma parte da programação ao vivo e parte posteriormente pelos links do YouTube	5		Sim	5		Não	5	5	Preenchimento das listas de presença	Foi bom, mas evitar em futuros eventos	Fundamental, manter em futuros eventos	Não	Não participei :(	5
2020/12/23 9:14:45 PM GMT-3	Ciências biológicas	Estudante de graduação	Técnica em Agropecuária	5	Sim	Assisti uma parte da programação ao vivo e parte posteriormente pelos links do YouTube	5	Adorei todo o evento, agradeço pela oportunidade e parabenizo a todos pela organização do mesmo este só teve a complementar a minha formação.	Sim	5	Foram explicativas, me auxiliaram em duvidas sobre as temáticas abordadas, contribuíram significativamente para minha bagagem.	Sim	5	5	Dificuldade em acessar os links do YouTube;Preenchimento das listas de presença	Fundamental, manter em futuros eventos	Fundamental, manter em futuros eventos	Sim	#TeamJaguatirica	5		Todo o evento só complementou e enriqueceu minha formação.	Gostaria que as listas fossem enviadas para o e-mail, me perco muito para assina-las	Parabenizo e agradeço a todos pelo evento
2020/12/23 9:18:05 PM GMT-3	Ciências Agrárias	Estudante de graduação	Medicina Veterinária	5	Sim	Assisti uma parte da programação ao vivo e parte posteriormente pelos links do YouTube	5	Grandes palestras.	Sim	4		Não	2	5	Preenchimento das listas de presença;Acesso aos e-mails com notícias do I WOB20	Fundamental, manter em futuros eventos	Fundamental, manter em futuros eventos	Não	Não participei :(	5		Gosto muito de tudo que envolva a bioinformática e o evento de vocês foi de alto nível e com palestras que me inspiraram muito. Parabéns a todos os envolvidos. Participarei de todos os próximos eventos.		Obrigado pelo evento e espero em um futuro "normal", visitar esse programa e Universidade que tanto me inspirou nas pesquisas
2020/12/23 9:25:00 PM GMT-3	Ciências Agrárias	Estudante de graduação	Medicina Veterinária	5	Sim	Assisti uma parte da programação ao vivo e parte posteriormente pelos links do YouTube	5		Sim	5		Sim	5	5	Preenchimento das listas de presença;Acesso aos e-mails com notícias do I WOB20	Fundamental, manter em futuros eventos	Fundamental, manter em futuros eventos	Não	Não participei :(	5		Gostaria de parabenizar todos os envolvidos pelo evento, aprendi muito e tive grandes inspirações em pesquisa.		Gostaria em um futuro próximo ( sem covid) visitar essa universidade e programa de pós-graduação.
2020/12/23 9:32:17 PM GMT-3	Ciências biológicas	Graduada/Graduado	Ciências Biológicas	5	Sim	Assisti uma parte da programação ao vivo e parte posteriormente pelos links do YouTube	5		Não	5		Não	3	5	Dificuldade de me concentrar durante o evento	Fundamental, manter em futuros eventos	Fundamental, manter em futuros eventos	Não	Não participei :(	3		O evento foi ótimo, Parabéns!		Vocês poderiam manter os eventos com transmissão online mesmo após a pandemia, pra quem trabalha em horário comercial é quase impossível acompanhar esse tipo de evento de forma presencial e essa é uma ótima maneira da gente também poder participar =]
2020/12/23 9:33:28 PM GMT-3	Ciências biológicas	Pós-doc em andamento	Doutorado em Genética e Biologia Molecular	5	Sim	Assisti uma parte da programação ao vivo e parte posteriormente pelos links do YouTube	5		Sim	5		Não	3	5	Problemas com a conexão de internet	Fundamental, manter em futuros eventos	Fundamental, manter em futuros eventos	Sim	Não participei :(	3
2020/12/23 9:33:44 PM GMT-3	Ciências da computação	Graduada/Graduado	Gestão de tecnologia da informação	5	Sim	Assisti a programação completa ao vivo	5		Sim	5		Sim	5	5	Acesso aos e-mails com notícias do I WOB20	Fundamental, manter em futuros eventos	Fundamental, manter em futuros eventos	Sim	#TeamCapivara	5
2020/12/23 9:35:58 PM GMT-3	Ciências biológicas	Estudante de graduação	Ensino Médio	5	Não	Não assisti à programação completa, apenas assisti o que pude ver ao vivo	5	Evento super organizado, amei a interação final com os times.	Não	5		Sim	5	5	Problemas com a conexão de internet	Fundamental, manter em futuros eventos	Fundamental, manter em futuros eventos	Sim	#TeamCapivara	5	Achei genial!			No meu coração ficou ainda mais intensa a vontade de participar do PPG em Bioinformática da UFMG. Time maravilhoso, meus abraços para o Diego Mariano, Raquel Minardi, Miguel e Glória.
2020/12/23 9:48:01 PM GMT-3	Estudante de Zootecnia	Estudante de graduação	2º grau completo (ensino médio)	5	Não	Não assisti à programação completa, apenas assisti o que pude ver ao vivo	5	As palestras em que assisti foram muito boas. Parabéns pela organização do evento.	Não	5		Não	3	5	Não houve dificuldade.	Fundamental, manter em futuros eventos	Fundamental, manter em futuros eventos	Não	Não participei :(	3
2020/12/23 9:48:59 PM GMT-3	Ciências biológicas	Pós-doc concluído	10	5	Sim	Assisti a programação completa ao vivo	5		Sim	5		Sim	5	5	Acesso aos e-mails com notícias do I WOB20	Fundamental, manter em futuros eventos	Fundamental, manter em futuros eventos	Não	#TeamCobra	5
2020/12/23 9:58:32 PM GMT-3	Ciências biológicas	Mestranda (o)	Biomédica	5	Sim	Assisti a programação completa pelas gravações no YouTube	5		Sim	5		Sim	4	5	Problemas com a conexão de internet	Fundamental, manter em futuros eventos	Fundamental, manter em futuros eventos	Sim	#TeamCapivara	5
2020/12/23 10:01:47 PM GMT-3	Biotecnologia	Estudante de graduação	Biotecnologia	5	Sim	Assisti uma parte da programação ao vivo e parte posteriormente pelos links do YouTube	5		Sim	5		Não	2	5	Problemas com a conexão de internet;Dificuldade de me concentrar durante o evento;Preenchimento das listas de presença;Dificuldade em realizar doações para a campanha beneficente "Projeto X"	Fundamental, manter em futuros eventos	Fundamental, manter em futuros eventos	Não	Não participei :(	4
2020/12/23 10:11:10 PM GMT-3	Ciências biológicas	Estudante de graduação	Técnico em Equipamentos Biomédicos	5	Sim	Assisti a programação completa ao vivo	5		Sim	5		Sim	5	5	Dificuldade de me concentrar durante o evento	Fundamental, manter em futuros eventos	Fundamental, manter em futuros eventos	Sim	#TeamCapivara	5
2020/12/23 10:23:27 PM GMT-3	Ciências biológicas	Graduada/Graduado	Pós graduação	5	Sim	Assisti uma parte da programação ao vivo e parte posteriormente pelos links do YouTube	5		Sim	5		Sim	5	5	Problemas com a conexão de internet;Dificuldade de me concentrar durante o evento;Dificuldade em realizar doações para a campanha beneficente "Projeto X"	Fundamental, manter em futuros eventos	Fundamental, manter em futuros eventos	Sim	#TeamJaguatirica	5
2020/12/23 10:25:13 PM GMT-3	Biotecnologia	Graduada/Graduado	Especialização em Informática em Saúde - UNIFESP	5	Sim	Assisti a programação completa ao vivo	5	Foi maravilhoso, nunca havia participado de um evento tão bem feito.Tanto em conteúdo quanto em produção.	Sim	5	Foram ótimas.	Não	3	5	Dificuldade em realizar doações para a campanha beneficente "Projeto X"	Fundamental, manter em futuros eventos	Fundamental, manter em futuros eventos	Sim	#TeamCapivara	5	Não consegui acessar o Salão Comunal, talvez não tenha entendido como acessar.	Coisa mais linda os intérpretes de libras, interpretando sobre sequenciamento. Momento mágico!	Não consegui doar. Ficou parecendo que eu doei, mas não foi cobrado no meu cartão de crédito.	Só elogios pra essa turma toda. Só escutei elogios de todos os colegas das universidades.
2020/12/23 10:25:53 PM GMT-3	Ciências biológicas	Graduada/Graduado	Graduação	5	Não	Assisti uma parte da programação ao vivo e parte posteriormente pelos links do YouTube	5		Não	5		Não	5	5	Dificuldade de me concentrar durante o evento	Fundamental, manter em futuros eventos	Fundamental, manter em futuros eventos	Sim	#TeamCobra	5
2020/12/23 10:27:20 PM GMT-3	Engenharia de Bioprocessos e Biotecnologia	Estudante de graduação	Ensino médio	5	Sim	Assisti a programação completa ao vivo	5		Sim	5		Sim	5	5	Problemas com a conexão de internet;Acesso aos e-mails com notícias do I WOB20	Fundamental, manter em futuros eventos	Fundamental, manter em futuros eventos	Não	Não participei :(	5
2020/12/23 10:30:16 PM GMT-3	Biomedicina	Estudante de graduação	Biomedicina	5	Sim	Assisti a programação completa ao vivo	5		Sim	5		Não	4	5	Problemas com a conexão de internet	Fundamental, manter em futuros eventos	Fundamental, manter em futuros eventos	Não	Não participei :(	4		Evento muito bom, bem organizado e muito bem pensado a questão do intérprete de libras!	Se puder ser transmitido online como foi esse ano que permite que pessoas de outras cidades poderem participar	Quero participar sempre!
2020/12/23 10:35:23 PM GMT-3	Ciências biológicas	Estudante de graduação	Licenciatura em Ciências Biológicas	5	Sim	Assisti uma parte da programação ao vivo e parte posteriormente pelos links do YouTube	5		Não	5		Sim	5	5	Problemas com a conexão de internet	Fundamental, manter em futuros eventos	Fundamental, manter em futuros eventos	Sim	#TeamJaguatirica	5
2020/12/23 10:43:17 PM GMT-3	Ciências biológicas	Graduada/Graduado	Biomedicina	5	Sim	Assisti a programação completa ao vivo	5		Sim	5		Sim	5	5	Não tive problemas.	Fundamental, manter em futuros eventos	Fundamental, manter em futuros eventos	Não	Não participei :(	3
2020/12/23 10:45:40 PM GMT-3	Ciências biológicas	Mestranda (o)	Engenharia de Bioprocessos e Biotecnologia	5	Sim	Assisti a programação completa ao vivo	5		Sim	5		Sim	5	5	Acesso aos e-mails com notícias do I WOB20	Fundamental, manter em futuros eventos	Fundamental, manter em futuros eventos	Não	Não participei :(	3
2020/12/23 10:51:02 PM GMT-3	Engenharaia da Computação	Estudante de graduação	Engenharaia da Computação	4	Sim	Assisti uma parte da programação ao vivo e parte posteriormente pelos links do YouTube	4		Sim	4		Não	1	4	Dificuldade em acessar os links do YouTube;Preenchimento das listas de presença	Fundamental, manter em futuros eventos	Fundamental, manter em futuros eventos	Não	Não participei :(	1
2020/12/23 11:00:03 PM GMT-3	Ciências biológicas	Estudante de graduação	Biomedicina	5	Sim	Assisti uma parte da programação ao vivo e parte posteriormente pelos links do YouTube	5		Não	5		Sim	5	5	Problemas com a conexão de internet	Fundamental, manter em futuros eventos	Fundamental, manter em futuros eventos	Não	Não participei :(	5
2020/12/23 11:00:55 PM GMT-3	Ciências da computação	Mestra/Mestre	MESTRADO EM CIÊNCIAS DA COMPUTAÇÃO	5	Sim	Assisti a programação completa ao vivo	5		Não	5		Não	1	5	Nao tive dificuldades	Fundamental, manter em futuros eventos	Fundamental, manter em futuros eventos	Não	Não participei :(	5
2020/12/23 11:13:18 PM GMT-3	Ciências biológicas	Mestra/Mestre	Botânica	4	Sim	Assisti a programação completa ao vivo	4		Não	4		Sim	4	4	Problemas com a conexão de internet	Fundamental, manter em futuros eventos	Fundamental, manter em futuros eventos	Não	#TeamJaguatirica	4
2020/12/23 11:16:34 PM GMT-3	Ciências biológicas	Estudante de graduação	Biomedicina	5	Sim	Assisti uma parte da programação ao vivo e parte posteriormente pelos links do YouTube	5		Sim	5		Sim	5	5	Dificuldade de me concentrar durante o evento;Preenchimento das listas de presença	Fundamental, manter em futuros eventos	Fundamental, manter em futuros eventos	Não	Não participei :(	4				Amo os eventos que esse time aí faz, muita força pra vocês. Espero daqui um tempo estar no mestrado na UFMG e ajudando nesses eventos também <3
2020/12/23 11:19:41 PM GMT-3	Ciências biológicas	Mestranda (o)	MESTRE EM BIOQUIMICA E IMUNOLOGIA	5	Sim	Assisti uma parte da programação ao vivo e parte posteriormente pelos links do YouTube	5	NENHUM	Não	5	NENHUM	Sim	5	5	Problemas com a conexão de internet	Fundamental, manter em futuros eventos	Fundamental, manter em futuros eventos	Não	Não participei :(	4	NENHUM	Otimo evento, muito bem organizado e com uma excelente tematica.	achei tudo bem	amei o evento, gostaria de que tenha um novo WOB
2020/12/23 11:21:18 PM GMT-3	Bioinformatica	Mestra/Mestre	Mestrado em Genética e Biologia Molecular	5	Sim	Assisti uma parte da programação ao vivo e parte posteriormente pelos links do YouTube	5		Sim	5		Sim	5	5	Problemas com a conexão de internet	Fundamental, manter em futuros eventos	Fundamental, manter em futuros eventos	Não	Não participei :(	5
2020/12/23 11:29:28 PM GMT-3	Ciências biológicas	Estudante de graduação	biologia	5	Sim	Assisti a programação completa pelas gravações no YouTube	5	Ansiosa para o próximo	Sim	5	Achei que foram esclarecedoras!	Não	1	5	Problemas com a conexão de internet;Acesso aos e-mails com notícias do I WOB20	Fundamental, manter em futuros eventos	Fundamental, manter em futuros eventos	Não	Não participei :(	2	Não participei, infelizmente	Valeu por tudo!	Acessibilidade aos e-mails	Só agradecer a essa equipe maravilhosa!
2020/12/23 11:35:48 PM GMT-3	Ciências biológicas	Graduada/Graduado	Licenciatura em C.B.	5	Sim	Assisti uma parte da programação ao vivo e parte posteriormente pelos links do YouTube	5		Sim	5		Não	3	5	Dificuldade em acessar os links do YouTube	Fundamental, manter em futuros eventos	Fundamental, manter em futuros eventos	Não	Não participei :(	3
2020/12/23 11:51:51 PM GMT-3	Ciências biológicas	Mestranda (o)	Programa de pós graduação em microbiologia- ufba	5	Sim	Assisti a programação completa pelas gravações no YouTube	5		Não	5		Sim	4	5	Dificuldade de me concentrar durante o evento	Fundamental, manter em futuros eventos	Fundamental, manter em futuros eventos	Não	Não participei :(	4				Adorei o evento ,o temática das mesas redondas foi bem pensado , a organização foi espetacular .
2020/12/23 11:55:49 PM GMT-3	Ciências biológicas	Mestranda (o)	Programação de pós graduação em microbiologia	5	Sim	Assisti a programação completa pelas gravações no YouTube	5		Não	5		Não	2	5	Dificuldade de me concentrar durante o evento	Fundamental, manter em futuros eventos	Fundamental, manter em futuros eventos	Não	Não participei :(	3
2020/12/24 12:00:53 AM GMT-3	Ciências biológicas	Mestranda (o)	Ciências Biológicas	5	Sim	Assisti a programação completa ao vivo	4		Sim	4		Não	3	4	Problemas com a conexão de internet	Fundamental, manter em futuros eventos	Fundamental, manter em futuros eventos	Sim	#TeamJaguatirica	4				Excelente evento, parabéns! Continuem com esse trabalho incrível!
2020/12/24 12:14:41 AM GMT-3	Ciências exatas não computacionais	Doutoranda (o)	Química	4	Sim	Assisti uma parte da programação ao vivo e parte posteriormente pelos links do YouTube	4		Sim	4		Sim	4	4	Problemas com a conexão de internet;Dificuldade de me concentrar durante o evento	Fundamental, manter em futuros eventos	Fundamental, manter em futuros eventos	Sim	#TeamJacaré	4
2020/12/24 12:52:06 AM GMT-3	Ciências biológicas	Doutoranda (o)	Biomedicina-Medicina	5	Sim	Assisti uma parte da programação ao vivo e parte posteriormente pelos links do YouTube	5		Não	4		Sim	5	5	Problemas com a conexão de internet	Fundamental, manter em futuros eventos	Fundamental, manter em futuros eventos	Não	Não participei :(	3
2020/12/24 12:52:46 AM GMT-3	Biomedicina	Mestra/Mestre	Doutoranda	4	Sim	Assisti uma parte da programação ao vivo e parte posteriormente pelos links do YouTube	4	sem sugestões.	Não	4	sem sugestões.	Sim	4	4	Problemas com a conexão de internet	Fundamental, manter em futuros eventos	Fundamental, manter em futuros eventos	Não	Não participei :(	1	sem comentários.	Muito boa organização.	sem sugestões.	sem comentários.
2020/12/24 1:10:22 AM GMT-3	Ciências biológicas	Estudante de graduação	Nenhum	4	Sim	Assisti a programação completa ao vivo	5	Não	Sim	5	Não	Sim	4	4	Problemas com a conexão de internet;Dificuldade em acessar os links do YouTube;Dificuldade de me concentrar durante o evento;Preenchimento das listas de presença;Acesso aos e-mails com notícias do I WOB20;Dificuldade em realizar doações para a campanha beneficente "Projeto X"	Fundamental, manter em futuros eventos	Fundamental, manter em futuros eventos	Não	Não participei :(	4	Não	Ótimo	Nenhum	Nenhum
2020/12/24 1:11:22 AM GMT-3	Biomedicina	Doutoranda (o)	Mestrado em Microbiologia	5	Sim	Assisti uma parte da programação ao vivo e parte posteriormente pelos links do YouTube	5		Sim	4		Sim	5	5	Dificuldade de me concentrar durante o evento	Fundamental, manter em futuros eventos	Fundamental, manter em futuros eventos	Sim	#TeamCapivara	5	Anunciar mais a respeito nas transmissões do evento.	Parabenizo a toda comissão. Ótimo evento.		Votos de bem estar, saúde e esperança a todos. Se cuidem!
2020/12/24 1:11:40 AM GMT-3	Biomedicina	Doutoranda (o)	Mestrado em Microbiologia	5	Sim	Assisti uma parte da programação ao vivo e parte posteriormente pelos links do YouTube	5		Sim	4		Sim	5	5	Dificuldade de me concentrar durante o evento	Fundamental, manter em futuros eventos	Fundamental, manter em futuros eventos	Sim	#TeamCapivara	5	Anunciar mais a respeito nas transmissões do evento.	Parabenizo a toda comissão. Ótimo evento.		Votos de bem estar, saúde e esperança a todos. Se cuidem!
2020/12/24 1:29:57 AM GMT-3	Ciências biológicas	Estudante de graduação	Nenhum	5	Sim	Assisti uma parte da programação ao vivo e parte posteriormente pelos links do YouTube	5	A programação foi excelente, já possuía grande interesse na área e com o evento pude adquirir conhecimentos que irão contribuir para minha formação	Sim	5		Não	3	5	Problemas com a conexão de internet;Dificuldade de me concentrar durante o evento	Fundamental, manter em futuros eventos	Fundamental, manter em futuros eventos	Sim	#TeamJaguatirica	5		Conteúdo excelente, bem atual e ministrado com uma didática majestosa	Melhorar no quesito tempo de apresentação, para que não prejudique as apresentações	Foi um evento maravilhoso, espero poder fazer parte de muitos outros que estejam plr vir
2020/12/24 1:37:20 AM GMT-3	Engenharia de Bioprocessos e Biotecnologia	Estudante de graduação	Ensino médio	5	Sim	Assisti a programação completa pelas gravações no YouTube	5		Não	5		Sim	5	5	Acesso aos e-mails com notícias do I WOB20	Fundamental, manter em futuros eventos	Fundamental, manter em futuros eventos	Não	Não participei :(	5
2020/12/24 2:33:14 AM GMT-3	Ciências exatas não computacionais	Estudante de graduação	Engenharia Química	5	Sim	Assisti a programação completa ao vivo	5		Sim	4		Sim	5	5	Problemas com a conexão de internet;Dificuldade em acessar os links do YouTube	Fundamental, manter em futuros eventos	Fundamental, manter em futuros eventos	Não	Não participei :(	3
2020/12/24 2:35:30 AM GMT-3	Ciências biológicas	Graduada/Graduado	Biomédica	4	Sim	Assisti uma parte da programação ao vivo e parte posteriormente pelos links do YouTube	4		Sim	4		Sim	3	4	Problemas com a conexão de internet;Dificuldade de me concentrar durante o evento;Preenchimento das listas de presença	Fundamental, manter em futuros eventos	Fundamental, manter em futuros eventos	Não	Não participei :(	1
2020/12/24 2:39:27 AM GMT-3	Ciências biológicas	Estudante de graduação	Biotecnologia	5	Sim	Assisti uma parte da programação ao vivo e parte posteriormente pelos links do YouTube	5		Sim	5		Sim	5	5	Problemas com a conexão de internet;Dificuldade em realizar doações para a campanha beneficente "Projeto X"	Fundamental, manter em futuros eventos	Fundamental, manter em futuros eventos	Não	Não participei :(	5
2020/12/24 7:49:22 AM GMT-3	Interdisciplinar	Estudante de graduação	Ensino Médio	5	Não	Assisti uma parte da programação ao vivo e parte posteriormente pelos links do YouTube	5		Não	4		Sim	5	5	nenhuma dificuldade	Fundamental, manter em futuros eventos	Fundamental, manter em futuros eventos	Não	Não participei :(	5
2020/12/24 7:59:18 AM GMT-3	Ciências biológicas	Doutoranda (o)	Mestre em Genética e Biologia Molecular	4	Sim	Assisti a programação completa ao vivo	4		Não	5		Não	3	5	Problemas com a conexão de internet	Fundamental, manter em futuros eventos	Fundamental, manter em futuros eventos	Sim	#TeamJaguatirica	5
2020/12/24 8:08:33 AM GMT-3	Ciências biológicas	Mestranda (o)	Ciências Biológicas- Licenciatura	4	Sim	Assisti uma parte da programação ao vivo e parte posteriormente pelos links do YouTube	5		Sim	4		Não	4	5	Preenchimento das listas de presença;Minha dificuldade foi mais pessoal. Como moro fora do BR os horários as vezes divergiam com o meu trabalho e as vezes não conseguia acompanhar a palestra ou mesa redonda e consequentemente não assinei a lista de presença numa das situações	Fundamental, manter em futuros eventos	Fundamental, manter em futuros eventos	Não	Não participei :(	5				Achei o evento muito interessante. As palestras e mesa redonda foram fundamentais. Parabéns pela organização do evento
2020/12/24 9:32:44 AM GMT-3	Interdisciplinar	Estudante de graduação	Biotecnologia	5	Sim	Assisti uma parte da programação ao vivo e parte posteriormente pelos links do YouTube	5		Sim	5		Não	2	5	Não enfrentei dificuldades	Fundamental, manter em futuros eventos	Fundamental, manter em futuros eventos	Não	Não participei :(	5
2020/12/24 9:37:47 AM GMT-3	Ciências biológicas	Doutoranda (o)	Mestre em Microbiologia	5	Sim	Assisti uma parte da programação ao vivo e parte posteriormente pelos links do YouTube	4		Sim	4		Sim	5	4	Problemas com a conexão de internet;Dificuldade em acessar os links do YouTube	Fundamental, manter em futuros eventos	Fundamental, manter em futuros eventos	Não	Não participei :(	5
2020/12/24 9:38:01 AM GMT-3	Ciências biológicas	Doutoranda (o)	Mestrado em Ciências (Infectologia)	5	Sim	Assisti a programação completa ao vivo	5		Sim	5		Não	3	5	Problemas com a conexão de internet;Preenchimento das listas de presença	Fundamental, manter em futuros eventos	Fundamental, manter em futuros eventos	Não	Não participei :(	1
2020/12/24 9:50:26 AM GMT-3	Ciências biológicas	Estudante de graduação	Estou na graduação	5	Sim	Assisti a programação completa ao vivo	5	Amei todas as palestras	Sim	5		Sim	5	5	Problemas com a conexão de internet	Fundamental, manter em futuros eventos	Fundamental, manter em futuros eventos	Não	Não participei :(	1		O evento foi extremamente importante e lindo. Amei todas os dias de eventos e palestras		Façam uma nova edição o mais rápido possível rsrs
2020/12/24 9:56:48 AM GMT-3	Ciências biológicas	Graduada/Graduado	MBA	5	Sim	Assisti a programação completa ao vivo	5	Agradecer pelo evento maravilhoso e repleto de informações. Parabéns aos organizadores .	Sim	5	Parabenizar a todos e agradecer pelos conhecimentos recebidos.	Sim	5	5	Problemas com a conexão de internet	Fundamental, manter em futuros eventos	Fundamental, manter em futuros eventos	Sim	#TeamCobra	5	Apenas dizer que adorei a idéia.Parabéns.	Que todos envolvidos nesse projeto tenham muita saúde,sucesso e anos de vida para outros projetos e continuarem divulgando ciência.		Trabalho, sucesso e vida longa galera.
2020/12/24 10:07:07 AM GMT-3	Ciências biológicas	Estudante de graduação	Ciências Biológicas	5	Sim	Assisti a programação completa ao vivo	5		Sim	5		Sim	5	5	Não enfrentei dificuldades	Fundamental, manter em futuros eventos	Fundamental, manter em futuros eventos	Não	Não participei :(	5				O evento foi sensacional! Fiquei muito feliz por ter tido a oportunidade de participar de um evento desse nível de forma totalmente gratuita e mesmo sendo de outra instituição! Gostaria muito de participar de outros eventos organizado por vocês!
2020/12/24 10:42:34 AM GMT-3	Ciências biológicas	Doutora/Doutor	Higiene Veterinária e Processamento de Produtos de Origem Animal	5	Sim	Assisti uma parte da programação ao vivo e parte posteriormente pelos links do YouTube	4		Não	3		Sim	4	5	Problemas com a conexão de internet	Fundamental, manter em futuros eventos	Fundamental, manter em futuros eventos	Não	Não participei :(	2
2020/12/24 10:43:47 AM GMT-3	Ciências biológicas	Mestranda (o)	Bioinformática	4	Sim	Assisti uma parte da programação ao vivo e parte posteriormente pelos links do YouTube	5		Sim	5		Não	3	4	Problemas com a conexão de internet	Fundamental, manter em futuros eventos	Fundamental, manter em futuros eventos	Não	Não participei :(	3
2020/12/24 10:46:20 AM GMT-3	Ciências biológicas	Estudante de graduação	Bacharelado em Enfermagem	5	Sim	Assisti a programação completa pelas gravações no YouTube	5		Sim	5		Não	3	5	Problemas com a conexão de internet	Fundamental, manter em futuros eventos	Fundamental, manter em futuros eventos	Não	Não participei :(	3
2020/12/24 10:56:06 AM GMT-3	Ciências biológicas	Estudante de graduação	Engenharia de Bioprocessos e Biotecnologia	5	Sim	Assisti uma parte da programação ao vivo e parte posteriormente pelos links do YouTube	5		Não	4		Sim	4	5	Preenchimento das listas de presença	Fundamental, manter em futuros eventos	Fundamental, manter em futuros eventos	Não	Não participei :(	5		EVENTO MARAVILHOSO, espero passar no mestrado do programa em 2022 <3	Só uma sugestão de um detalhezinho: reservar um horário especial para a introdução do evento/apresentação do projeto social, para que não atrase a primeira palestra. Mas o evento foi maravilhosoo
2020/12/24 10:58:29 AM GMT-3	Ciências biológicas	Estudante de graduação	Biomedicina	5	Sim	Assisti uma parte da programação ao vivo e parte posteriormente pelos links do YouTube	5		Sim	5		Não	2	5	Dificuldade de me concentrar durante o evento	Fundamental, manter em futuros eventos	Fundamental, manter em futuros eventos	Não	Não participei :(	5		Evento excelente em todos os aspectos, com temas abrangendo diversas áreas fundamentais com profissionais que ministravam palestras/aulas/cursos muito didáticos.		Parabéns pela excelente organização! Estou ansiosa por futuros eventos!
2020/12/24 10:59:51 AM GMT-3	Ciências da computação	Estudante de graduação	Informática Biomédica	5	Sim	Assisti a programação completa ao vivo	5		Sim	5		Sim	5	5	Acesso aos e-mails com notícias do I WOB20	Fundamental, manter em futuros eventos	Fundamental, manter em futuros eventos	Não	Não participei :(	5		Foi ótimo! Parabéns!
2020/12/24 11:00:07 AM GMT-3	Ciências biológicas	Doutoranda (o)	Microbiologia agrícola	5	Não	Assisti uma parte da programação ao vivo e parte posteriormente pelos links do YouTube	5		Sim	5		Não	3	5	Problemas com a conexão de internet;Preenchimento das listas de presença	Fundamental, manter em futuros eventos	Fundamental, manter em futuros eventos	Sim	#TeamCobra	5		Vocês são ótimos! Já participei do curso de verão também e saí muito motivada! Parabéns!
2020/12/24 11:00:07 AM GMT-3	Ciências da computação	Estudante de graduação	Informática Biomédica	5	Sim	Assisti a programação completa ao vivo	5		Sim	5		Sim	5	5	Acesso aos e-mails com notícias do I WOB20	Fundamental, manter em futuros eventos	Fundamental, manter em futuros eventos	Não	Não participei :(	5		Foi ótimo! Parabéns!
2020/12/24 11:06:21 AM GMT-3	Ciências biológicas	Estudante de graduação	Graduada no Ensino Médio	5	Sim	Assisti a programação completa ao vivo	5		Sim	5		Sim	5	5	Problemas com a conexão de internet;Dificuldade de me concentrar durante o evento	Fundamental, manter em futuros eventos	Fundamental, manter em futuros eventos	Não	Não participei :(	5
2020/12/24 11:14:00 AM GMT-3	Ciências biológicas	Doutoranda (o)	Biotecnologia	5	Não	Assisti uma parte da programação ao vivo e parte posteriormente pelos links do YouTube	4		Não	4		Sim	5	5	Preenchimento das listas de presença	Fundamental, manter em futuros eventos	Fundamental, manter em futuros eventos	Não	Não participei :(	3
2020/12/24 11:21:13 AM GMT-3	Ciências biológicas	Mestranda (o)	Graduação em Ciências Biológicas	5	Sim	Assisti a programação completa ao vivo	5	Foi um evento maravilhoso! Espero que tenha mais vezes.	Sim	5		Sim	5	5	Problemas com a conexão de internet	Fundamental, manter em futuros eventos	Fundamental, manter em futuros eventos	Não	Não participei :(	5
2020/12/24 11:23:55 AM GMT-3	Ciências biológicas	Estudante de graduação	Técnico em Informática	4	Sim	Assisti a programação completa ao vivo	5		Sim	4		Não	3	4	Preenchimento das listas de presença	Fundamental, manter em futuros eventos	Fundamental, manter em futuros eventos	Não	Não participei :(	3
2020/12/24 11:28:25 AM GMT-3	Ciências biológicas	Mestranda (o)	Biossistemas	5	Não	Assisti uma parte da programação ao vivo e parte posteriormente pelos links do YouTube	5	Excelente!	Não	3	Particularmente não gosto muito de mesas-redondas	Não	1	5	nenhum	Fundamental, manter em futuros eventos	Foi bom, mas evitar em futuros eventos	Não	Não participei :(	1	Nenhum
2020/12/24 11:29:12 AM GMT-3	Ciências biológicas	Graduada/Graduado	Bacharelado em Ciências Biológicas	5	Sim	Assisti a programação completa ao vivo	5	O WOB20 foi o melhor evento de 2020, na qualidade, programação e temas. Parabéns a todos organizadores e palestrantes.	Sim	5	Temas pertinentes e que muitas vezes não são tão comentados no dia a dia da formação.	Não	3	5	Problemas com a conexão de internet	Fundamental, manter em futuros eventos	Fundamental, manter em futuros eventos	Sim	#TeamJaguatirica	5	Somente aproveitando o prêmio #TimeOnça	Parabéns aos palestrantes e organizadores por esse excelente evento.
2020/12/24 11:34:12 AM GMT-3	Ciências biológicas	Doutora/Doutor	IMUNOLOGIA	5	Sim	Assisti uma parte da programação ao vivo e parte posteriormente pelos links do YouTube	4	PODEM PROGRAMAR MAIS CURSOS DE ANALISE DE TRANSCRIPTOMICA POR FAVOR	Sim	5	NÃO	Não	4	5	Preenchimento das listas de presença	Fundamental, manter em futuros eventos	Fundamental, manter em futuros eventos	Sim	#TeamJaguatirica	5	NÃO	MUITO BOM ME DERAM UM PANORAMA QUE ESTAVA PRECISANDO	FAZER A PARTE DE TRANSCRIPTOMICA	MUITO OBRIGADO ACHO QUE É UMA GUIA FUNDAMENTAL PARA QUEM QUER COMEÇAR E PARA FUTUROS PROJETOS JÁ FUTURAMENTE BIOINFORMATIVA VAI SER INDISPENSAVEL
2020/12/24 11:48:26 AM GMT-3	Interdisciplinar	Estudante de graduação	Bacharelado interdisciplinar em ciências e tecnologia do mar	5	Sim	Assisti uma parte da programação ao vivo e parte posteriormente pelos links do YouTube	5		Sim	5		Sim	4	5	Dificuldade de me concentrar durante o evento	Fundamental, manter em futuros eventos	Fundamental, manter em futuros eventos	Não	#TeamCobra	2
2020/12/24 11:52:45 AM GMT-3	Ciências biológicas	Mestranda (o)	Engenheiro Agrônomo	5	Sim	Assisti a programação completa ao vivo	5		Sim	5		Sim	5	5	Problemas com a conexão de internet	Fundamental, manter em futuros eventos	Fundamental, manter em futuros eventos	Não	Não participei :(	5				O melhor workshop do Brasil
2020/12/24 12:02:15 PM GMT-3	Ciências biológicas	Doutoranda (o)	Mestrado em Entomologia	5	Sim	Assisti a programação completa ao vivo	5		Não	3	As mesas redondas ficaram muito longas	Não	2	5	Problemas com a conexão de internet	Fundamental, manter em futuros eventos	Fundamental, manter em futuros eventos	Sim	#TeamJaguatirica	4
2020/12/24 12:13:22 PM GMT-3	Ciências biológicas	Pós-doc em andamento	Genética e biologia molecular	5	Sim	Assisti a programação completa ao vivo	5		Sim	5		Sim	5	5	Dificuldade em realizar doações para a campanha beneficente "Projeto X"	Fundamental, manter em futuros eventos	Fundamental, manter em futuros eventos	Sim	#TeamJaguatirica	5	O tempo para se cadastrar no curso prêmio da taça das casas foi muito curto. Lamentavelmente perdi o meu cupom	Excelente workshop. Temas súper atuais e deu uma perspetiva enorme da área da bioinfo.		Amei o workshop
2020/12/24 12:20:44 PM GMT-3	Biotecnologia	Graduada/Graduado	Biotecnologia	5	Sim	Assisti uma parte da programação ao vivo e parte posteriormente pelos links do YouTube	5	O curso foi excelente , os professores e palestrantes eram incríveis, só queria elogiar o trabalho de vcs mesmo	Sim	5	Achei as mesas bastante informativas e bastante proveitosas. Parabéns a organização	Sim	4	5	Acesso aos e-mails com notícias do I WOB20;O e-mail ia direto pro spam, as vezes esquecia e só lembrava por conta da Google agenda. Mas foi uma dificuldade do meu e-mail mesmo, nada relacionado ao evento ou a organização	Fundamental, manter em futuros eventos	Fundamental, manter em futuros eventos	Não	Não participei :(	3
2020/12/24 12:48:04 PM GMT-3	Tecnologia em Alimentos	Estudante de graduação	Tecnologia em Alimentos	5	Sim	Assisti a programação completa ao vivo	5		Sim	5		Não	1	3	Dificuldade de me concentrar durante o evento	Fundamental, manter em futuros eventos	Fundamental, manter em futuros eventos	Não	Não participei :(	3
2020/12/24 12:55:34 PM GMT-3	Engenharia	Mestranda (o)	Engenharia Biomédica	5	Sim	Assisti uma parte da programação ao vivo e parte posteriormente pelos links do YouTube	5		Sim	5		Não	3	5	Dificuldade de me concentrar durante o evento	Fundamental, manter em futuros eventos	Fundamental, manter em futuros eventos	Sim	#TeamJaguatirica	5		Excelente evento, parabéns pela iniciativa!
2020/12/24 1:09:33 PM GMT-3	Ciências da computação	Estudante de graduação	Ensino médio	4	Não	Assisti uma parte da programação ao vivo e parte posteriormente pelos links do YouTube	5		Não	5		Não	3	5	tempo	Fundamental, manter em futuros eventos	Fundamental, manter em futuros eventos	Não	Não participei :(	4
2020/12/24 1:20:56 PM GMT-3	Ciências da computação	Estudante de graduação	ensino médio	4	Não	Assisti uma parte da programação ao vivo e parte posteriormente pelos links do YouTube	4		Não	4		Sim	5	5	Dificuldade de me concentrar durante o evento	Fundamental, manter em futuros eventos	Fundamental, manter em futuros eventos	Não	Não participei :(	5
2020/12/24 1:23:00 PM GMT-3	Farmácia	Pós-doc em andamento	Pós-graduação em Ciências Farmacêuticas (CiPharma)/ Universidade Federal de Ouro Preto	4	Sim	Assisti uma parte da programação ao vivo e parte posteriormente pelos links do YouTube	4		Sim	3		Sim	5	4	Preenchimento das listas de presença	Fundamental, manter em futuros eventos	Fundamental, manter em futuros eventos	Não	Não participei :(	2
2020/12/24 1:23:27 PM GMT-3	Farmácia	Pós-doc em andamento	Pós-graduação em Ciências Farmacêuticas (CiPharma)/ Universidade Federal de Ouro Preto	4	Sim	Assisti uma parte da programação ao vivo e parte posteriormente pelos links do YouTube	4		Sim	3		Sim	5	4	Preenchimento das listas de presença	Fundamental, manter em futuros eventos	Fundamental, manter em futuros eventos	Não	Não participei :(	2
2020/12/24 1:23:44 PM GMT-3	Farmácia	Pós-doc em andamento	Pós-graduação em Ciências Farmacêuticas (CiPharma)/ Universidade Federal de Ouro Preto	4	Sim	Assisti uma parte da programação ao vivo e parte posteriormente pelos links do YouTube	4		Sim	3		Sim	5	4	Preenchimento das listas de presença	Fundamental, manter em futuros eventos	Fundamental, manter em futuros eventos	Não	Não participei :(	2
2020/12/24 1:41:15 PM GMT-3	Engenharia de Software	Estudante de graduação	Engenharia de Software	5	Sim	Assisti a programação completa ao vivo	5	Alguns conteúdos eram muito específicos da áre de biológicas o que tornou algumas palestras um pouco difíceis de entender, mas ainda sim foi tudo muito bom.	Sim	5	As mesas redondas forma gratificantes para as discussoes	Não	3	5	Dificuldade de me concentrar durante o evento;Conteúdo muito específico da area de biológicas	Fundamental, manter em futuros eventos	Fundamental, manter em futuros eventos	Não	Não participei :(	3	Não participei ;(	Gostei muito de todas as palestras né ajudou a escolher o meu mestrado melhor	Talvez se possível uma explicação mais facilitada de conceitos e conteúdos das áreas abrangentes para melhor entendimento do todo	Perfeito, amei <3
2020/12/24 1:51:52 PM GMT-3	Ciências exatas não computacionais	Doutoranda (o)	Aquicultura e Recursos aquáticos tropicais	5	Sim	Assisti uma parte da programação ao vivo e parte posteriormente pelos links do YouTube	5	O evento foi incrível, adorei o formato. A organização está de parabéns	Não	5		Sim	5	5	Sem dificuldades	Fundamental, manter em futuros eventos	Fundamental, manter em futuros eventos	Sim	#TeamJaguatirica	5		O formato do evento foi excelente, deixo minhas congratulações à organização		Em meio a uma pandemia gerar ciência e compartilhar informação de forma gratuita e de qualidade reforça ainda mais a importância da educação no nosso país, e que ainda temos força para evoluir. Grato por todo o conhecimento compartilhado
2020/12/24 1:53:36 PM GMT-3	Biotecnologia	Estudante de graduação	Biotecnologia	5	Não	Assisti uma parte da programação ao vivo e parte posteriormente pelos links do YouTube	5		Não	5		Não	5	5	Preenchimento das listas de presença	Fundamental, manter em futuros eventos	Fundamental, manter em futuros eventos	Não	Não participei :(	3
2020/12/24 2:02:01 PM GMT-3	Ciências biológicas	Graduada/Graduado	Biologia	5	Sim	Assisti uma parte da programação ao vivo e parte posteriormente pelos links do YouTube	5		Sim	5		Sim	5	4	Problemas com a conexão de internet;Dificuldade em acessar os links do YouTube	Fundamental, manter em futuros eventos	Fundamental, manter em futuros eventos	Não	Não participei :(	1		Muito bem organizado	Ter mais de um evento anual	Parabéns gratidão
2020/12/24 2:06:06 PM GMT-3	Ciências biológicas	Estudante de graduação	B	5	Sim	Assisti a programação completa ao vivo	1		Sim	2		Sim	1	2	Problemas com a conexão de internet	Fundamental, manter em futuros eventos	Fundamental, manter em futuros eventos	Sim	Não participei :(	1		B	B	B
2020/12/24 2:11:36 PM GMT-3	Ciências biológicas	Estudante de graduação	Biologia	5	Sim	Assisti a programação completa ao vivo	5		Sim	5		Sim	4	4	Problemas com a conexão de internet	Fundamental, manter em futuros eventos	Fundamental, manter em futuros eventos	Não	Não participei :(	4
2020/12/24 2:12:07 PM GMT-3	Ciências biológicas	Mestranda (o)	Farmácia - Bioquímica	5	Sim	Assisti uma parte da programação ao vivo e parte posteriormente pelos links do YouTube	5		Sim	5		Não	5	5	Dificuldade em realizar doações para a campanha beneficente "Projeto X"	Foi bom, mas evitar em futuros eventos	Fundamental, manter em futuros eventos	Não	Não participei :(	5
2020/12/24 2:36:15 PM GMT-3	Ciências biológicas	Doutoranda (o)	Ciências agrárias	5	Sim	Assisti uma parte da programação ao vivo e parte posteriormente pelos links do YouTube	5		Sim	5		Sim	5	5	Dificuldade de me concentrar durante o evento	Fundamental, manter em futuros eventos	Fundamental, manter em futuros eventos	Não	Não participei :(	5
2020/12/24 3:28:33 PM GMT-3	Ciências biológicas	Pós-doc em andamento	Doutorado em Ciências	5	Sim	Assisti uma parte da programação ao vivo e parte posteriormente pelos links do YouTube	5		Sim	5		Sim	5	4	Problemas com a conexão de internet;Dificuldade de me concentrar durante o evento;Acesso aos e-mails com notícias do I WOB20	Fundamental, manter em futuros eventos	Fundamental, manter em futuros eventos	Não	Não participei :(	3
2020/12/24 3:29:44 PM GMT-3	Ciências biológicas	Estudante de graduação	Curso Técnico de nível médio em Informática - CEFETMG/Campus VIII	5	Sim	Assisti a programação completa ao vivo	5		Sim	5		Não	3	5	Nenhuma.	Fundamental, manter em futuros eventos	Fundamental, manter em futuros eventos	Não	Não participei :(	3
2020/12/24 3:31:07 PM GMT-3	Ciências biológicas	Doutoranda (o)	Mestrado em Biologia Funcional e Molecular	4	Não	Não assisti à programação completa, apenas assisti o que pude ver ao vivo	4		Não	5		Sim	5	5	Dificuldade de me concentrar durante o evento;Acesso aos e-mails com notícias do I WOB20	Fundamental, manter em futuros eventos	Fundamental, manter em futuros eventos	Sim	#TeamCapivara	4	Poderia ter divulgado por e-mail os vencedores. Até hj não sei quem venceu =(
2020/12/24 3:42:24 PM GMT-3	Interdisciplinar	Estudante de graduação	Biotecnologia	5	Sim	Assisti a programação completa ao vivo	5		Não	5		Sim	5	5	Dificuldade em acessar os links do YouTube;Dificuldade de me concentrar durante o evento	Fundamental, manter em futuros eventos	Fundamental, manter em futuros eventos	Sim	#TeamJaguatirica	5
2020/12/24 3:46:57 PM GMT-3	Ciências biológicas	Estudante de graduação	biologia	5	Sim	Assisti a programação completa ao vivo	5		Sim	5		Não	2	5	Problemas com a conexão de internet	Fundamental, manter em futuros eventos	Fundamental, manter em futuros eventos	Sim	#TeamJacaré	5	foi perfeito	foi perfeito	quero mais vezes	comissão perfeita
2020/12/24 4:07:09 PM GMT-3	Ciências biológicas	Graduada/Graduado	Medicina	4	Sim	Assisti a programação completa pelas gravações no YouTube	3		Não	4		Sim	5	3	Problemas com a conexão de internet;Dificuldade em acessar os links do YouTube;Dificuldade de me concentrar durante o evento;Preenchimento das listas de presença;Acesso aos e-mails com notícias do I WOB20	Fundamental, manter em futuros eventos	Fundamental, manter em futuros eventos	Não	Não participei :(	1
2020/12/24 4:15:57 PM GMT-3	Ciências biológicas	Doutoranda (o)	Biotecnologia Industrial	5	Sim	Assisti uma parte da programação ao vivo e parte posteriormente pelos links do YouTube	5		Sim	5		Sim	5	5	Acesso aos e-mails com notícias do I WOB20	Fundamental, manter em futuros eventos	Fundamental, manter em futuros eventos	Não	Não participei :(	5		Muito legal a iniciativa, palestrantes muito experientes, e com facilidade de transmitir esse conhecimento tão complexo para todo o tipo de publico!		Gostaria muito de participar de outras futuras edições, foi uma oportunidade impar, rever conceitos, aprender novos, entender o dia a dia da bioinformática e suas aplicações. Incrível!
2020/12/24 4:18:33 PM GMT-3	Ciências biológicas	Estudante de graduação	Ensino médio	5	Sim	Assisti a programação completa ao vivo	5		Não	4		Não	1	5	Dificuldade de me concentrar durante o evento	Fundamental, manter em futuros eventos	Fundamental, manter em futuros eventos	Sim	#TeamCapivara	5
2020/12/24 4:47:42 PM GMT-3	Ciências biológicas	Estudante de graduação	Ciências Biológicas	5	Sim	Assisti uma parte da programação ao vivo e parte posteriormente pelos links do YouTube	5		Sim	5		Não	3	5	Preenchimento das listas de presença;Acesso aos e-mails com notícias do I WOB20	Fundamental, manter em futuros eventos	Fundamental, manter em futuros eventos	Não	Não participei :(	5
2020/12/24 4:47:44 PM GMT-3	Ciências biológicas	Estudante de graduação	Biomedicina	4	Sim	Assisti uma parte da programação ao vivo e parte posteriormente pelos links do YouTube	5		Sim	4		Não	3	3	Problemas com a conexão de internet	Fundamental, manter em futuros eventos	Fundamental, manter em futuros eventos	Não	Não participei :(	3
2020/12/24 5:43:29 PM GMT-3	Ciências da computação	Graduada/Graduado	Tecnologia em Análise e Desenvolvimento de Sistemas	5	Sim	Assisti uma parte da programação ao vivo e parte posteriormente pelos links do YouTube	5	Gostei muito do evento. Aprendi bastante. Continuem assim.	Não	5	Não	Sim	5	5	Dificuldade em acessar os links do YouTube	Fundamental, manter em futuros eventos	Fundamental, manter em futuros eventos	Sim	#TeamCobra	5	Achei bem legal	Gostei muito do evento . Continuem assim.	Acho que vcs só tem a melhorar	Foi muito gratificante poder aprender com todos
2020/12/24 6:01:45 PM GMT-3	Ciências biológicas	Mestranda (o)	Ciências Biologicas	5	Sim	Assisti uma parte da programação ao vivo e parte posteriormente pelos links do YouTube	5	Gostei de como as palestras foram organizadas por dia, no primero dia o DNA, depois RNA e no ultimo dia Proteína.	Sim	5		Sim	3	5	Problemas com a conexão de internet	Fundamental, manter em futuros eventos	Fundamental, manter em futuros eventos	Não	Não participei :(	3		O evento foi ótimo, as palestras foram ótimas, a organização do evento também, gostei mais do dia sobre o DNA.		Achei interessante a forma como os estudantes de pós graduação do programa de bioinformática interage com os professores do programa, mais precisamente a relação harmoniosa que é mantida entre pós graduandos e professores, acredito que isso contribui de forma positiva para ambos e isso repercute na melhoria da produção etc.
2020/12/24 6:04:10 PM GMT-3	Ciências biológicas	Mestranda (o)	Ciencias biologicas	5	Sim	Assisti a programação completa ao vivo	5		Sim	5		Sim	5	5	Problemas com a conexão de internet	Fundamental, manter em futuros eventos	Fundamental, manter em futuros eventos	Não	Não participei :(	5
2020/12/24 6:13:28 PM GMT-3	Ciências biológicas	Mestranda (o)	ciências biologicas	5	Sim	Assisti uma parte da programação ao vivo e parte posteriormente pelos links do YouTube	5		Sim	4		Sim	3	5	Problemas com a conexão de internet	Fundamental, manter em futuros eventos	Fundamental, manter em futuros eventos	Não	Não participei :(	3		O evento foi ótimo, as palestras foram ótimas, a organização do evento também, gostei mais do dia sobre o DNA.		Achei interessante a forma como os estudantes de pós graduação do programa de bioinformática interage com os professores do programa, mais precisamente a relação harmoniosa que é mantida entre pós graduandos e professores, acredito que isso contribui de forma positiva para ambos e isso repercute na melhoria da produção etc.
2020/12/24 6:17:01 PM GMT-3	Ciências biológicas	Doutoranda (o)	Mestre	5	Sim	Assisti uma parte da programação ao vivo e parte posteriormente pelos links do YouTube	5		Não	5		Não	3	5	Acesso aos e-mails com notícias do I WOB20	Fundamental, manter em futuros eventos	Fundamental, manter em futuros eventos	Sim	#TeamJaguatirica	5		Evento excelente, estão de parabéns!		Só tenho a agradecer por esse evento de extrema qualidade que agregou muito para o meu crescimento.
2020/12/24 6:36:03 PM GMT-3	Ciências biológicas	Pós-doc concluído	Genética e biologia molecular	5	Sim	Assisti uma parte da programação ao vivo e parte posteriormente pelos links do YouTube	5		Sim	5		Sim	5	5	Problemas com a conexão de internet	Fundamental, manter em futuros eventos	Fundamental, manter em futuros eventos	Não	Não participei :(	4	Não participei
2020/12/24 6:37:28 PM GMT-3	Ciências biológicas	Mestranda (o)	Graduação	4	Sim	Assisti uma parte da programação ao vivo e parte posteriormente pelos links do YouTube	4		Não	4		Sim	4	4	Problemas com a conexão de internet;Dificuldade de me concentrar durante o evento;Preenchimento das listas de presença	Fundamental, manter em futuros eventos	Fundamental, manter em futuros eventos	Não	Não participei :(	1
2020/12/24 6:55:27 PM GMT-3	Ciências biológicas	Doutora/Doutor	Genetica, conservação e Biologia Evolutiva	5	Sim	Assisti uma parte da programação ao vivo e parte posteriormente pelos links do YouTube	5	Aguardando mais programas assim	Sim	5	Achei muito informativo	Sim	5	4	Preenchimento das listas de presença;Dificuldade em realizar doações para a campanha beneficente "Projeto X"	Fundamental, manter em futuros eventos	Fundamental, manter em futuros eventos	Não	Não participei :(	2	Não participei	Gostei muito o workshop, me ajudou bastante para resolver minhas duvidas	No futuro, poderia ser mais longo e inclui mais opções para carreira em bioinformatica	Amei o workshop. Quero mais assim no futuro
2020/12/24 6:56:19 PM GMT-3	Ciências biológicas	Doutora/Doutor	Genetica, conservação e Biologia Evolutiva	5	Sim	Assisti uma parte da programação ao vivo e parte posteriormente pelos links do YouTube	5	Aguardando mais programas assim	Sim	5	Achei muito informativo	Sim	5	4	Preenchimento das listas de presença;Dificuldade em realizar doações para a campanha beneficente "Projeto X"	Fundamental, manter em futuros eventos	Fundamental, manter em futuros eventos	Não	Não participei :(	2	Não participei	Gostei muito o workshop, me ajudou bastante para resolver minhas duvidas	No futuro, poderia ser mais longo e inclui mais opções para carreira em bioinformatica	Amei o workshop. Quero mais assim no futuro
2020/12/24 7:16:02 PM GMT-3	Odontologia	Estudante de graduação	Odontologia	3	Não	Não assisti à programação completa, apenas assisti o que pude ver ao vivo	5		Não	4		Sim	5	5	Dificuldade de me concentrar durante o evento	Fundamental, manter em futuros eventos	Fundamental, manter em futuros eventos	Não	Não participei :(	3
2020/12/24 7:16:25 PM GMT-3	Ciências biológicas	Graduada/Graduado	Ciências biológicas	5	Sim	Assisti uma parte da programação ao vivo e parte posteriormente pelos links do YouTube	5		Sim	5		Não	3	5	Não tive nenhuma dificuldade	Fundamental, manter em futuros eventos	Fundamental, manter em futuros eventos	Não	Não participei :(	3
2020/12/24 7:16:25 PM GMT-3	Odontologia	Estudante de graduação	Odontologia	3	Não	Não assisti à programação completa, apenas assisti o que pude ver ao vivo	5		Não	4		Sim	5	5	Dificuldade de me concentrar durante o evento	Fundamental, manter em futuros eventos	Fundamental, manter em futuros eventos	Não	Não participei :(	3
2020/12/24 7:29:26 PM GMT-3	Ciências Agrárias	Graduada/Graduado	Agronomia	4	Sim	Assisti uma parte da programação ao vivo e parte posteriormente pelos links do YouTube	4		Sim	4		Não	4	4	Dificuldade de me concentrar durante o evento	Fundamental, manter em futuros eventos	Fundamental, manter em futuros eventos	Não	Não participei :(	4
2020/12/24 8:38:20 PM GMT-3	Ciências biológicas	Pós-doc concluído	Pós-doc	5	Não	Assisti uma parte da programação ao vivo e parte posteriormente pelos links do YouTube	5		Não	4		Sim	4	5	Problemas com a conexão de internet;Dificuldade de me concentrar durante o evento	Fundamental, manter em futuros eventos	Fundamental, manter em futuros eventos	Não	Não participei :(	4
2020/12/24 9:55:06 PM GMT-3	Ciências biológicas	Mestra/Mestre	Mestre em Bioinformática	5	Sim	Assisti a programação completa ao vivo	5	Manter para os próximos anos	Sim	5	Nenhum	Sim	5	5	nenhum	Fundamental, manter em futuros eventos	Fundamental, manter em futuros eventos	Sim	#TeamJacaré	5	Mais prêmios	O evento foi muito bom, a modalidade online permitiu que mais pessoas participassem. Parabéns a toda equipe.	Minicursos online	Parabéns aos envolvidos, evento muito bem organizado.
2020/12/24 9:58:09 PM GMT-3	Biotecnologia	Graduada/Graduado	Ensino Médio	5	Não	Assisti uma parte da programação ao vivo e parte posteriormente pelos links do YouTube	5		Não	4		Sim	5	5	Problemas com a conexão de internet;Preenchimento das listas de presença;Acesso aos e-mails com notícias do I WOB20	Fundamental, manter em futuros eventos	Fundamental, manter em futuros eventos	Não	Não participei :(	3
2020/12/25 12:14:33 AM GMT-3	Ciências biológicas	Estudante de graduação	Biologia	5	Sim	Assisti a programação completa ao vivo	5		Sim	5		Não	5	5	Dificuldade de me concentrar durante o evento	Fundamental, manter em futuros eventos	Fundamental, manter em futuros eventos	Não	Não participei :(	5
2020/12/25 2:40:33 AM GMT-3	Interdisciplinar	Doutoranda (o)	Mestre em Ciências Ambientais	5	Sim	Assisti a programação completa ao vivo	5		Sim	5		Não	3	4	Acesso aos e-mails com notícias do I WOB20	Fundamental, manter em futuros eventos	Fundamental, manter em futuros eventos	Não	Não participei :(	3
2020/12/25 2:47:53 AM GMT-3	Biomedicina	Graduada/Graduado	Biomedicina	4	Sim	Assisti a programação completa ao vivo	5		Sim	5		Não	5	5	Problemas com a conexão de internet	Fundamental, manter em futuros eventos	Fundamental, manter em futuros eventos	Não	Não participei :(	2	Não compreendi com acessar ao regulamento e participação do desafio.			Adorei o evento e pretendo acompanhar mais e mais, as oportunidades de imersão na área da Bioinformática.
2020/12/25 6:31:44 AM GMT-3	Ciências biológicas	Estudante de graduação	Ciências Biológicas	5	Não	Não assisti à programação completa, apenas assisti o que pude ver ao vivo	5	Não	Não	5	Não	Não	3	5	Problemas com a conexão de internet	Fundamental, manter em futuros eventos	Fundamental, manter em futuros eventos	Não	Não participei :(	5	Não
2020/12/25 8:23:22 AM GMT-3	Farmácia	Estudante de graduação	Graduação	5	Sim	Assisti uma parte da programação ao vivo e parte posteriormente pelos links do YouTube	5		Sim	5		Sim	5	5	Problemas com a conexão de internet	Fundamental, manter em futuros eventos	Fundamental, manter em futuros eventos	Sim	#TeamJacaré	5
2020/12/25 9:15:29 AM GMT-3	Ciências biológicas	Estudante de graduação	Ensino médio	5	Não	Assisti uma parte da programação ao vivo e parte posteriormente pelos links do YouTube	5		Não	3		Não	3	4	Problemas com a conexão de internet	Fundamental, manter em futuros eventos	Fundamental, manter em futuros eventos	Não	Não participei :(	3
2020/12/25 9:21:02 AM GMT-3	Ciências biológicas	Doutoranda (o)	Programa de pós-graduação em Bioquímica e Biologia Molecular	5	Sim	Assisti uma parte da programação ao vivo e parte posteriormente pelos links do YouTube	5		Não	3		Não	4	5	Problemas com a conexão de internet;Dificuldade de me concentrar durante o evento	Fundamental, manter em futuros eventos	Fundamental, manter em futuros eventos	Não	Não participei :(	3
2020/12/25 10:01:03 AM GMT-3	Ciências biológicas	Mestranda (o)	Ciências Biológicas (Lic)	5	Sim	Assisti a programação completa ao vivo	5	Achei incrível a ideia de dividir os participantes em grupos para competir por um prêmio em comum a todos da equipe. Parabéns! A forma como foram separadas os grandes temas também foi bastante interessante. Parabéns a tod@s da organização pelo belíssimo evento.	Sim	5		Não	3	5	não encontrei dificuldades.	Fundamental, manter em futuros eventos	Fundamental, manter em futuros eventos	Sim	#TeamJaguatirica	5	Ideia excelente! de certa forma faz com que os participantes se engajem mais durante o evento. Talvez, no futuro, pudessem criar chats em plataformas como o telegram, por ex, para que os participantes de cada casa fossem mais incentivados a comunicarem entre si, já que um "ponto negativo" de eventos online é justamente a falta de interação entre os participantes.			Fico meio em dúvida se a ideia de organizar cada palestra em um link diferente tenha sido boa, porque meio que dispersa um pouco e deixou meio confuso, mas ao mesmo tempo foi interessante, porque fica mais fácil de pesquisar e rever no youtube, então meio que tem seus pontos positivos e negativos, mas eu apostaria em manter o formato. A newsletters do evento foi supimpa! bonita, bem organizada e …
2020/12/25 11:02:12 AM GMT-3	Ciências biológicas	Mestra/Mestre	Programa de Pós graduação em Genética	5	Não	Assisti uma parte da programação ao vivo e parte posteriormente pelos links do YouTube	5		Não	5		Não	3	5	Problemas com a conexão de internet;Dificuldade em realizar doações para a campanha beneficente "Projeto X"	Fundamental, manter em futuros eventos	Fundamental, manter em futuros eventos	Não	Não participei :(	3		Evento muito bem organizado e acessível. Palestras ricas em conteúdo e muito didáticas.
2020/12/25 11:21:49 AM GMT-3	Biomedicina	Doutoranda (o)	Mestre em Microbiologia	5	Sim	Assisti uma parte da programação ao vivo e parte posteriormente pelos links do YouTube	5		Sim	4		Sim	5	5	Dificuldade de me concentrar durante o evento	Fundamental, manter em futuros eventos	Fundamental, manter em futuros eventos	Sim	#TeamCapivara	5	Anunciar mais a respeito da taça nas transmissões do evento.	Parabenizo a toda comissão. Ótimo evento.		Votos de bem estar, saúde e esperança a todos. Se cuidem!
2020/12/25 12:30:07 PM GMT-3	Odontologia	Estudante de graduação	Odontologia	3	Não	Não assisti à programação completa, apenas assisti o que pude ver ao vivo	5		Não	4		Sim	5	5	Dificuldade de me concentrar durante o evento	Fundamental, manter em futuros eventos	Fundamental, manter em futuros eventos	Não	Não participei :(	3
2020/12/25 12:59:10 PM GMT-3	Farmácia	Estudante de graduação	Técnico em biotecnologia	5	Sim	Assisti uma parte da programação ao vivo e parte posteriormente pelos links do YouTube	5		Não	5		Não	3	5	Dificuldade de me concentrar durante o evento;Acesso aos e-mails com notícias do I WOB20	Fundamental, manter em futuros eventos	Fundamental, manter em futuros eventos	Sim	#TeamJacaré	5
2020/12/25 1:01:40 PM GMT-3	Ciências biológicas	Estudante de graduação	Biotecnologia	3	Não	Assisti uma parte da programação ao vivo e parte posteriormente pelos links do YouTube	4	Nenhum	Não	5	Nenhum	Não	2	5	Dificuldade de me concentrar durante o evento;Preenchimento das listas de presença	Fundamental, manter em futuros eventos	Fundamental, manter em futuros eventos	Não	Não participei :(	3	Nenhum	Muito bom o workshop	Nenhum	Obrigado
2020/12/25 1:17:21 PM GMT-3	Ciências biológicas	Estudante de graduação	Ciências Bioógicas	5	Sim	Assisti a programação completa ao vivo	5		Sim	5		Não	3	5	Problemas com a conexão de internet;Acesso aos e-mails com notícias do I WOB20	Fundamental, manter em futuros eventos	Fundamental, manter em futuros eventos	Não	Não participei :(	3
2020/12/25 2:06:06 PM GMT-3	Ciências biológicas	Doutoranda (o)	Mestrado	5	Sim	Assisti uma parte da programação ao vivo e parte posteriormente pelos links do YouTube	5	Tudo maravilhoso! Gratidão!	Não	5		Não	5	5	Problemas com a conexão de internet	Fundamental, manter em futuros eventos	Fundamental, manter em futuros eventos	Não	Não participei :(	5		Adorei todas as palestras! Fiquei feliz em participar!	Por hora, nenhuma.
2020/12/25 3:35:51 PM GMT-3	Ciências exatas não computacionais	Doutoranda (o)	bioinformatica	5	Sim	Assisti uma parte da programação ao vivo e parte posteriormente pelos links do YouTube	5		Sim	5		Sim	5	5	Problemas com a conexão de internet	Fundamental, manter em futuros eventos	Fundamental, manter em futuros eventos	Não	Não participei :(	5
2020/12/25 4:03:47 PM GMT-3	Ciências biológicas	Doutoranda (o)	Mestra	5	Sim	Assisti a programação completa ao vivo	5	Simplesmente parabenizar por todo o esforço da equipe organizadora quanto dos palestrantes. Foram ricos conhecimentos compartilhados. Mais uma vez, parabéns.	Sim	4		Sim	4	5	Dificuldade em acessar os links do YouTube	Fundamental, manter em futuros eventos	Fundamental, manter em futuros eventos	Não	Não participei :(	3		Os temas debatidos foram todos excelentes e as ações discutidas pelos palestrantes foram todas sensacionais.	Eu fiquei um pouco confusa na entrada para o acesso às palestras seguintes. Mas nada de mais.	Mais uma vez parabenizar pelo evento que foi brilhante.
2020/12/25 4:57:14 PM GMT-3	Ciências biológicas	Estudante de graduação	Ensino médio	5	Não	Assisti uma parte da programação ao vivo e parte posteriormente pelos links do YouTube	5	Excelente organização	Não	5		Não	2	5	Problemas com a conexão de internet	Fundamental, manter em futuros eventos	Fundamental, manter em futuros eventos	Não	Não participei :(	5
2020/12/25 5:02:17 PM GMT-3	Ciências biológicas	Graduada/Graduado	Biomedicina	4	Sim	Assisti a programação completa ao vivo	5		Não	4		Sim	5	5	Nenhu, só pedi uma folguinha do laboratório pra acompanhar as transmissões	Fundamental, manter em futuros eventos	Fundamental, manter em futuros eventos	Não	Não participei :(	2		Organização excelente, palestras muito bem divididas por temáticas, além de palestrantes e conteúdos incríveis.		O Workshop contribui para adquirir novos conhecimentos, além de relembrar alguns conteúdos. Espero que a UFMG continue sempre inovando e trazendo conteúdos na área da Bioinformática. A propósito, foi através do último curso de Verão em Bioinformática (2020) que eu tive a certeza que quero seguir nesta área e sempre que tiver a oportunidade, participarei de todos os eventos.
2020/12/25 5:28:47 PM GMT-3	Ciências biológicas	Doutoranda (o)	Genética e Biologia Molecular	5	Não	Assisti uma parte da programação ao vivo e parte posteriormente pelos links do YouTube	5	Não	Não	5	Não	Não	3	5	Dificuldade de me concentrar durante o evento;Preenchimento das listas de presença	Fundamental, manter em futuros eventos	Fundamental, manter em futuros eventos	Não	Não participei :(	4	Não
2020/12/25 6:32:36 PM GMT-3	Ciências biológicas	Graduada/Graduado	Ciências Biológicas - Biotecnologia	5	Não	Assisti uma parte da programação ao vivo e parte posteriormente pelos links do YouTube	5	Sem sugestões. A escolha dos temas e a programação geral foram excelentes.	Não	2	Mais foco na discussão do tema por parte dos envolvidos, menos em trajetórias pessoais.	Não	2	5	Dificuldade de me concentrar durante o evento	Fundamental, manter em futuros eventos	Fundamental, manter em futuros eventos	Não	Não participei :(	2	Nada a declarar.	Ótimo evento. Gostei muito dos temas, abordados por profissionais com (na maioria) excelente didática. Muito boa a iniciativa de inclusão com a equipe de libras.	As mesas redondas, no geral, deixaram a desejar. Esperava uma discussão e uma abordagem maior dos temas, sem que os convidados falassem tanto sobre trajetórias e trabalhos pessoais.	Que seja o primeiro de muitos eventos!
2020/12/25 7:24:40 PM GMT-3	Interdisciplinar	Mestranda (o)	Bacharelado em Biotecnologia	5	Não	Assisti uma parte da programação ao vivo e parte posteriormente pelos links do YouTube	5		Sim	5		Sim	5	5	Preenchimento das listas de presença	Fundamental, manter em futuros eventos	Fundamental, manter em futuros eventos	Não	Não participei :(	3
2020/12/25 8:14:01 PM GMT-3	Ciências biológicas	Estudante de graduação	Biomedicina	4	Sim	Assisti uma parte da programação ao vivo e parte posteriormente pelos links do YouTube	4		Não	5		Não	5	4	Problemas com a conexão de internet;Dificuldade de me concentrar durante o evento	Fundamental, manter em futuros eventos	Fundamental, manter em futuros eventos	Não	#TeamJaguatirica	1
2020/12/25 8:16:40 PM GMT-3	Ciências biológicas	Estudante de graduação	BIOMEDICINA	4	Sim	Assisti uma parte da programação ao vivo e parte posteriormente pelos links do YouTube	4		Não	3		Não	3	1	Problemas com a conexão de internet	Fundamental, manter em futuros eventos	Fundamental, manter em futuros eventos	Não	Não participei :(	3
2020/12/25 9:39:22 PM GMT-3	Ciências biológicas	Mestra/Mestre	Bioquimica	5	Sim	Assisti a programação completa ao vivo	5		Não	5		Não	3	5	Problemas com a conexão de internet;Dificuldade em acessar os links do YouTube	Fundamental, manter em futuros eventos	Fundamental, manter em futuros eventos	Não	Não participei :(	3
2020/12/25 9:43:17 PM GMT-3	Ciências biológicas	Doutoranda (o)	Pós Graduação em Biologia Celular e Molecular	5	Sim	Assisti a programação completa ao vivo	4		Sim	5		Não	5	4	Problemas com a conexão de internet;Dificuldade de me concentrar durante o evento	Fundamental, manter em futuros eventos	Fundamental, manter em futuros eventos	Não	Não participei :(	4
2020/12/25 9:47:22 PM GMT-3	Ciências biológicas	Doutoranda (o)	Biotecnologia Vegetal	5	Sim	Assisti a programação completa ao vivo	5		Sim	5		Não	5	5	nenhuma	Fundamental, manter em futuros eventos	Fundamental, manter em futuros eventos	Sim	#TeamJaguatirica	5		Evento excelente, parabéns!		<3
2020/12/26 9:43:16 AM GMT-3	Ciências biológicas	Estudante de graduação	Técnico em Enfermagem	5	Sim	Assisti uma parte da programação ao vivo e parte posteriormente pelos links do YouTube	5		Não	5		Não	5	5	Dificuldade de me concentrar durante o evento	Fundamental, manter em futuros eventos	Fundamental, manter em futuros eventos	Não	Não participei :(	5		Muito bom o evento! Não conhecia esse ramo da Bioinformática e pude esclarecer muito a respeito no evento!		Agradeço a participação como mero ouvinte, foi de grande valia. Eventos assim nos enriquecem como profissionais, no meu caso, como futuro profissional.
2020/12/26 9:54:04 AM GMT-3	Ciências biológicas	Graduada/Graduado	Biotecnologia	5	Sim	Assisti uma parte da programação ao vivo e parte posteriormente pelos links do YouTube	5		Sim	5		Não	4	5	Problemas com a conexão de internet	Fundamental, manter em futuros eventos	Fundamental, manter em futuros eventos	Não	Não participei :(	3
2020/12/26 10:03:17 AM GMT-3	Ciências biológicas	Estudante de graduação	Técnico em Enfermagem	5	Sim	Assisti uma parte da programação ao vivo e parte posteriormente pelos links do YouTube	5		Não	5		Sim	5	5	Dificuldade de me concentrar durante o evento	Fundamental, manter em futuros eventos	Fundamental, manter em futuros eventos	Não	Não participei :(	5		Muito bom o evento! Não conhecia esse ramo da Bioinformática e pude esclarecer muito a respeito no evento!		Agradeço a participação como mero ouvinte, foi de grande valia. Eventos assim nos enriquecem como profissionais, no meu caso, como futuro profissional.
2020/12/26 11:26:05 AM GMT-3	Biotecnologia	Estudante de graduação	Biotecnologia	5	Não	Assisti uma parte da programação ao vivo e parte posteriormente pelos links do YouTube	5		Sim	5		Não	2	5	Apenas com o horário do evento, pois estava em aula , mas assisti posteriormente.	Fundamental, manter em futuros eventos	Fundamental, manter em futuros eventos	Não	Não participei :(	3		Gostaria de parabenizar a toda equipe envolvida, todas as palestras que assisti foram ótimas e instigantes para pessoas que assim como eu estão entrando nesse mundo da bioinformática. Palestrantes muito didáticos e ótimos comentários! Obrigada, pessoal :)
2020/12/26 11:38:32 AM GMT-3	Biotecnologia	Doutoranda (o)	Mestrado em Genética e Evolução	5	Sim	Assisti uma parte da programação ao vivo e parte posteriormente pelos links do YouTube	5	Não	Sim	5	Não	Sim	5	5	Problemas com a conexão de internet	Fundamental, manter em futuros eventos	Fundamental, manter em futuros eventos	Não	Não participei :(	5	Não	Tudo muito organizado. Excelente!
2020/12/26 1:38:49 PM GMT-3	Ciências Agrárias	Doutoranda (o)	mestrado em zootecnia	5	Sim	Assisti a programação completa ao vivo	5		Não	5		Não	1	5	nenhuma dificuldade	Fundamental, manter em futuros eventos	Fundamental, manter em futuros eventos	Sim	#TeamJaguatirica	5	Excelente iniciativa. Adorei!	Adorei o evento de um modo geral, principalmente a forma descontraída como foi conduzida a interação com os participantes. Estão de parabéns pela criatividade, mesmo!!!
2020/12/26 2:51:52 PM GMT-3	Ciências exatas não computacionais	Mestranda (o)	Matemática	4	Não	Assisti uma parte da programação ao vivo e parte posteriormente pelos links do YouTube	5		Não	4		Sim	5	5	Problemas com a conexão de internet	Fundamental, manter em futuros eventos	Fundamental, manter em futuros eventos	Não	Não participei :(	1				Obrigada pela dedicação com o evento, é fundamental eventos assim, que mostram de forma leve a ciência!
2020/12/26 3:32:06 PM GMT-3	Ciências biológicas	Mestranda (o)	Graduação em Ciências Biológicas	5	Não	Assisti uma parte da programação ao vivo e parte posteriormente pelos links do YouTube	5		Não	5		Não	4	5	Problemas com a conexão de internet;Dificuldade de me concentrar durante o evento	Fundamental, manter em futuros eventos	Fundamental, manter em futuros eventos	Não	Não participei :(	5
2020/12/26 3:32:55 PM GMT-3	Ciências da computação	Estudante de graduação	Ensino Médio	5	Sim	Assisti a programação completa ao vivo	5		Sim	4		Sim	5	5	Dificuldade em acessar os links do YouTube	Fundamental, manter em futuros eventos	Fundamental, manter em futuros eventos	Não	Não participei :(	5
2020/12/26 4:13:48 PM GMT-3	Ciências biológicas	Doutoranda (o)	Mestrado em química	5	Sim	Assisti a programação completa ao vivo	5		Sim	5		Sim	5	5	Problemas com a conexão de internet	Fundamental, manter em futuros eventos	Fundamental, manter em futuros eventos	Não	Não participei :(	3
2020/12/26 4:57:34 PM GMT-3	Ciências biológicas	Doutoranda (o)	Biotecnologia	5	Sim	Assisti a programação completa ao vivo	5		Sim	5		Sim	5	5	Problemas com a conexão de internet	Fundamental, manter em futuros eventos	Fundamental, manter em futuros eventos	Sim	#TeamCapivara	3		Achei o evento ótimo, bem organizado, excelentes palestrantes	Achei tudo tão bom que se melhorar estraga	Parabéns aos organizadores
2020/12/26 5:00:44 PM GMT-3	Ciências da computação	Graduada/Graduado	Especialista em sistemas de informação CIC/UnB	5	Sim	Assisti uma parte da programação ao vivo e parte posteriormente pelos links do YouTube	5	Ótima programação, divisão de temas, e organização em geral. Parabéns.	Sim	4		Não	3	5	Problemas com a conexão de internet	Fundamental, manter em futuros eventos	Fundamental, manter em futuros eventos	Não	Não participei :(	3		Gostei bastante. Participei do presencial em janeiro na UFMG, mesmo clima bom.	Talvez disponibilizar as apresentações ou material de apoio.	Parabéns e obrigado pelo evento.
2020/12/26 5:18:12 PM GMT-3	Ciências biológicas	Estudante de graduação	Ensino médio (último título de formação)	5	Sim	Assisti a programação completa ao vivo	5		Não	5		Sim	5	5	Nenhuma	Fundamental, manter em futuros eventos	Fundamental, manter em futuros eventos	Não	Não participei :(	5
2020/12/26 7:40:20 PM GMT-3	Ciências biológicas	Estudante de graduação	Graduando	5	Não	Assisti uma parte da programação ao vivo e parte posteriormente pelos links do YouTube	5	Acho que pode ter um controle maior do tempo, talvez por uma melhor comunicação entre palestrante e organização. Só aconteceu uma vez de um passar muito do tempo estabelecido, mas é minha única sugestão rs.	Não	5	Não vi todas por falta de tempo em um dia específico, mas todas que vi foram extremamente inspiradoras. Amei, mesmo. Acho que foram muito necessários esses temas quase "pessoais" de algumas mesas, como a formação de carreira na bioinformática. Como estudante de graduação, me senti muito motivada.	Sim	5	5	Acesso aos e-mails com notícias do I WOB20	Fundamental, manter em futuros eventos	Fundamental, manter em futuros eventos	Não	Não participei :(	4				Já deixei alguns nas respostas passadas :p risos. Mas é isso, amei, achei muito acolhedor o formato. Particularmente, não estou frequentando a universidade por motivo de distanciamento social. Além disso, estou no fim do curso, então não tenho contato sequer por vídeo com a comunidade acadêmica dela. O evento foi um abraço pra mim, me reconectou com o meio e me deixou motivada e inspirada novamen…
2020/12/26 9:02:27 PM GMT-3	Ciências biológicas	Estudante de graduação	Ciências Biológicas	5	Não	Assisti uma parte da programação ao vivo e parte posteriormente pelos links do YouTube	5	Muito satisfatório as palestras e o evento foi muito bem organizado. Gostei muito da diversidade de temas dentro da bioinformática.	Não	5		Sim	5	5	Não tive dificuldades.	Fundamental, manter em futuros eventos	Fundamental, manter em futuros eventos	Sim	#TeamCapivara	5	Achei maravilhosa como uma boa fã de Harry Potter que sou haha Adorei a criatividade :)	Evento incrível abrangendo as grandes áreas da bioinformáticas com palestrantes incríveis, mesas redondas extremamente interessantes e a organização impecável. Melhor evento que participei este ano sem dúvida haha
2020/12/26 9:34:40 PM GMT-3	Licenciatura em Química	Estudante de graduação	Licenciatura em Química	5	Sim	Assisti uma parte da programação ao vivo e parte posteriormente pelos links do YouTube	5	Quando será o próximo?	Sim	5		Sim	5	5	A maior dificuldade é relação a alguns temas que ainda não domino ou nunca havia ouvido falar.	Fundamental, manter em futuros eventos	Fundamental, manter em futuros eventos	Não	Não participei :(	3		Excelente programação, excelente coordenação. Estão todos de parabéns!
2020/12/26 10:36:22 PM GMT-3	ensino médio finalizado	Estudante de ensino médio	ensino médio	5	Sim	Assisti uma parte da programação ao vivo e parte posteriormente pelos links do YouTube	5		Sim	5		Não	3	5	Problemas com a conexão de internet;Acesso aos e-mails com notícias do I WOB20	Fundamental, manter em futuros eventos	Fundamental, manter em futuros eventos	Não	Não participei :(	1		muito inclusivo e explicativo	cumprir mais certinho os horarios	amei kkkkkk
2020/12/26 11:35:13 PM GMT-3	Ciências biológicas	Doutoranda (o)	Mestrado em Zootecnia (Melhoramento Animal)	5	Sim	Assisti a programação completa ao vivo	5		Não	4		Não	2	5	Acesso aos e-mails com notícias do I WOB20	Fundamental, manter em futuros eventos	Fundamental, manter em futuros eventos	Sim	#TeamJaguatirica	5
2020/12/27 12:41:11 AM GMT-3	Ciências biológicas	Doutoranda (o)	Biotecnologia Industrial	4	Não	Assisti uma parte da programação ao vivo e parte posteriormente pelos links do YouTube	4		Não	3		Sim	5	4	Dificuldade de me concentrar durante o evento	Fundamental, manter em futuros eventos	Fundamental, manter em futuros eventos	Sim	#TeamCobra	5
2020/12/27 2:01:48 AM GMT-3	Biotecnologia	Estudante de graduação	Ensino Médio	5	Sim	Assisti uma parte da programação ao vivo e parte posteriormente pelos links do YouTube	5		Não	4		Não	3	5	Dificuldade de me concentrar durante o evento;Acesso aos e-mails com notícias do I WOB20	Fundamental, manter em futuros eventos	Fundamental, manter em futuros eventos	Não	Não participei :(	3		A dinâmica expressiva e entusiasmada sobre os temas dos palestrantes e hosts ajudaram no engajamento e na retenção de atenção e os temas pareceram relevantes e atuais para alguém como eu, que sabia pouco sobre, e queria saber mais sobre a área.	horários e datas muito próximos e sem respiro que tornaram difícil me organizar para acompanhar tudo ao vivo e pareceram atrapalhar alguns palestrantes em usar o tempo quanto eles precisavam de um pouco mais.
2020/12/27 3:16:03 AM GMT-3	Biomedicina	Graduada/Graduado	Biomedicina	5	Sim	Assisti uma parte da programação ao vivo e parte posteriormente pelos links do YouTube	5		Sim	4		Não	3	5	Problemas com a conexão de internet	Fundamental, manter em futuros eventos	Fundamental, manter em futuros eventos	Não	Não participei :(	3
2020/12/27 7:53:59 AM GMT-3	Ciências biomédicas	Mestranda (o)	Biomedicina - Bacharelado	4	Não	Assisti a programação completa ao vivo	5		Sim	5		Sim	5	5	Problemas com a conexão de internet	Fundamental, manter em futuros eventos	Fundamental, manter em futuros eventos	Não	Não participei :(	3
2020/12/27 8:24:40 AM GMT-3	Ciências biológicas	Doutoranda (o)	Mestrado em Biotecnologia	5	Sim	Assisti a programação completa ao vivo	5	O evento foi incrível! Parabéns aos envolvidos	Sim	5		Não	3	5	Não tive dificuldades	Fundamental, manter em futuros eventos	Fundamental, manter em futuros eventos	Sim	#TeamCobra	3		Parabéns por cada momento no evento, principalmente interprete em libras
2020/12/27 10:01:58 AM GMT-3	Ciências biológicas	Mestranda (o)	Licenciatura em Ciências Biológicas	5	Sim	Assisti uma parte da programação ao vivo e parte posteriormente pelos links do YouTube	5		Não	4		Não	1	5	Acesso aos e-mails com notícias do I WOB20	Fundamental, manter em futuros eventos	Fundamental, manter em futuros eventos	Não	Não participei :(	1		Gostei bastante do evento, parabéns!
2020/12/27 12:48:32 PM GMT-3	Ciências biológicas	Doutora/Doutor	Biotecnologia	5	Sim	Assisti a programação completa ao vivo	5		Sim	5	Extrapolou o tempo.	Não	3	5	Dificuldade de me concentrar durante o evento	Fundamental, manter em futuros eventos	Fundamental, manter em futuros eventos	Sim	#TeamJacaré	3		O evento dividiu bem os temas ao longo dos dias.	Esse questionário deveria ter sido feito logo após o evento, mesmo se o certificado ainda ñ estivesse pronto. Muitas sugestões que os participantes poderiam dar ficam esquecidas.	Muitos palestrantes mostraram conhecimento na parte da computação e isso foi muito bom. Em muitos workshops de bioinformática que eu participei a parte biológica é muito mais valorizada, aí ñ agrega muito para quem é da minha área.
2020/12/27 12:53:19 PM GMT-3	Ciências biológicas	Estudante de graduação	biomedicina	5	Sim	Assisti uma parte da programação ao vivo e parte posteriormente pelos links do YouTube	5		Sim	5		Sim	5	5	Dificuldade de me concentrar durante o evento	Fundamental, manter em futuros eventos	Fundamental, manter em futuros eventos	Não	Não participei :(	5
2020/12/27 2:30:31 PM GMT-3	Ciências biológicas	Estudante de graduação	Ensino médio	5	Sim	Assisti a programação completa ao vivo	5		Não	5		Não	5	5	problemas pra concliar o evento com o trabalho	Fundamental, manter em futuros eventos	Fundamental, manter em futuros eventos	Não	Não participei :(	5
2020/12/27 3:28:48 PM GMT-3	ciências agrárias	Mestranda (o)	Bacharelado em Medicina Veterinária	5	Sim	Assisti uma parte da programação ao vivo e parte posteriormente pelos links do YouTube	5	Sensacional, adorei as palestras, os moderadores, adorei o clima leve da equipe organizadora, só tenho elogios!!	Sim	5		Sim	5	5	Problemas com a conexão de internet	Fundamental, manter em futuros eventos	Fundamental, manter em futuros eventos	Sim	#TeamJaguatirica	5	competição perfeita, prêmio melhor ainda. Achei inovador			Fazia tempo que eu queria participar do curso de verão presencial, mas nunca consegui por causa do distância/deslocamento. Participar do WOB2020 foi um gostinho maravilindo do curso de verão e só aumentou a minha vontade de participar na próxima edição. Gratidão pelo evento e pela forma que ele foi conduzido, a leveza da equipe diminuiu o cansaço que o estudo online provoca
2020/12/27 4:16:35 PM GMT-3	Ciências biológicas	Doutora/Doutor	Ciências da Saúde	4	Não	Assisti uma parte da programação ao vivo e parte posteriormente pelos links do YouTube	4		Não	4		Sim	5	4	Dificuldade de me concentrar durante o evento;Preenchimento das listas de presença	Fundamental, manter em futuros eventos	Desnecessário, não repetir	Não	Não participei :(	4
2020/12/27 4:19:49 PM GMT-3	Ciências exatas não computacionais	Estudante de graduação	MATEMÁTICA	3	Sim	Assisti uma parte da programação ao vivo e parte posteriormente pelos links do YouTube	3		Não	2		Sim	5	4	Dificuldade de me concentrar durante o evento	Fundamental, manter em futuros eventos	Foi bom, mas evitar em futuros eventos	Não	Não participei :(	4
2020/12/27 4:22:58 PM GMT-3	Ciências exatas não computacionais	Estudante de graduação	LICENCIATURA EM MATEMATICA	3	Sim	Assisti uma parte da programação ao vivo e parte posteriormente pelos links do YouTube	3		Não	3		Sim	5	3	Dificuldade de me concentrar durante o evento	Fundamental, manter em futuros eventos	Foi bom, mas evitar em futuros eventos	Não	Não participei :(	4
2020/12/27 4:28:14 PM GMT-3	Interdisciplinar	Doutoranda (o)	Imunologia	5	Sim	Assisti a programação completa ao vivo	5		Sim	5		Sim	5	5	Problemas com a conexão de internet	Fundamental, manter em futuros eventos	Fundamental, manter em futuros eventos	Sim	#TeamCapivara	3
2020/12/27 5:08:01 PM GMT-3	Ciências biológicas	Mestranda (o)	Bacharel em Biomedicina	5	Sim	Assisti a programação completa ao vivo	5		Sim	4		Sim	4	5	Dificuldade de me concentrar durante o evento	Fundamental, manter em futuros eventos	Fundamental, manter em futuros eventos	Não	Não participei :(	5
2020/12/27 6:02:27 PM GMT-3	Agronomia	Doutoranda (o)	Agronomia	5	Sim	Assisti a programação completa pelas gravações no YouTube	5		Sim	5		Sim	5	5	Problemas com a conexão de internet	Fundamental, manter em futuros eventos	Fundamental, manter em futuros eventos	Não	Não participei :(	5
2020/12/27 6:48:05 PM GMT-3	Ciências biológicas	Mestranda (o)	Biomedicina	5	Sim	Assisti uma parte da programação ao vivo e parte posteriormente pelos links do YouTube	5		Sim	5		Não	3	5	Sem dificuldades.	Fundamental, manter em futuros eventos	Fundamental, manter em futuros eventos	Sim	#TeamCapivara	5
2020/12/27 8:32:09 PM GMT-3	Ciências biológicas	Mestranda (o)	Bacharelado em Farmácia	5	Sim	Assisti uma parte da programação ao vivo e parte posteriormente pelos links do YouTube	5		Sim	5		Não	2	5	Dificuldade de me concentrar durante o evento	Fundamental, manter em futuros eventos	Fundamental, manter em futuros eventos	Não	Não participei :(	1
2020/12/27 9:51:58 PM GMT-3	Farmácia	Estudante de graduação	Farmácia	5	Sim	Assisti uma parte da programação ao vivo e parte posteriormente pelos links do YouTube	5		Sim	5		Não	5	5	Problemas com a conexão de internet;Dificuldade em acessar os links do YouTube;Preenchimento das listas de presença	Fundamental, manter em futuros eventos	Fundamental, manter em futuros eventos	Não	Não participei :(	2		Parabéns pelo empenho da equipe !!	Não tenho do que reclamar, apenas da minha internet.	Amei o evento
2020/12/27 10:11:10 PM GMT-3	Ciências biológicas	Estudante de graduação	Farmácia	5	Sim	Assisti a programação completa ao vivo	5		Sim	5		Não	2	5	No geral não tive grandes dificuldades durante a participação no I WOB	Fundamental, manter em futuros eventos	Fundamental, manter em futuros eventos	Sim	#TeamCapivara	5	Achei extremamente divertido, deu um ar bastante leve ao evento.	O evento foi muito bem organizado, com as mesas redondas de temas bastante importantes. O evento foi perfeito na minha concepção.		Muito obrigado por fazerem um evento tão bacana, com o carinho que tiveram. Cada detalhe tão bem pensado, fico sem palavras. E no mais, parabéns a toda organização pelo evento!
2020/12/27 11:23:12 PM GMT-3	Ciências biológicas	Graduada/Graduado	Especialização em ensino em ciências	5	Sim	Assisti a programação completa pelas gravações no YouTube	5	Excelente e muito bem organizado.	Sim	5	Excelente	Sim	5	5	Dificuldade de me concentrar durante o evento	Fundamental, manter em futuros eventos	Fundamental, manter em futuros eventos	Não	Não participei :(	3	Apesar de não ter participado, gostei da iniciativa.
2020/12/28 1:38:45 AM GMT-3	Ciências biológicas	Mestranda (o)	Ciências Genômicas e Biotecnologia	5	Sim	Assisti a programação completa ao vivo	5	Muito bem pensado a tradução em libras	Sim	5		Não	1	5	Dificuldade de me concentrar durante o evento;Acesso aos e-mails com notícias do I WOB20	Fundamental, manter em futuros eventos	Fundamental, manter em futuros eventos	Não	Não participei :(	5
2020/12/28 1:39:01 AM GMT-3	Ciências biológicas	Mestranda (o)	Ciências Genômicas e Biotecnologia	5	Sim	Assisti a programação completa ao vivo	5	Muito bem pensado a tradução em libras	Sim	5		Não	1	5	Dificuldade de me concentrar durante o evento;Acesso aos e-mails com notícias do I WOB20	Fundamental, manter em futuros eventos	Fundamental, manter em futuros eventos	Não	Não participei :(	5
2020/12/28 3:19:32 AM GMT-3	Farmácia	Graduada/Graduado	Farmácia	5	Sim	Assisti uma parte da programação ao vivo e parte posteriormente pelos links do YouTube	5	Excelente!	Sim	5		Sim	5	5	Não tive problemas	Fundamental, manter em futuros eventos	Fundamental, manter em futuros eventos	Não	Não participei :(	1
2020/12/28 8:25:43 AM GMT-3	Ciências biológicas	Estudante de graduação	EM	5	Não	Assisti a programação completa ao vivo	4		Sim	4		Não	2	4	Dificuldade de me concentrar durante o evento	Fundamental, manter em futuros eventos	Fundamental, manter em futuros eventos	Sim	#TeamJaguatirica	5
2020/12/28 9:37:06 AM GMT-3	Ciências biológicas	Doutoranda (o)	Mestre	5	Sim	Assisti uma parte da programação ao vivo e parte posteriormente pelos links do YouTube	5		Não	3		Não	3	5	Dificuldade de me concentrar durante o evento	Fundamental, manter em futuros eventos	Fundamental, manter em futuros eventos	Não	Não participei :(	3
2020/12/28 9:41:17 AM GMT-3	Ciências biológicas	Doutoranda (o)	Análises Clínicas e Toxicológicas	5	Sim	Assisti a programação completa ao vivo	5	Não, achei excelente	Sim	5	não	Sim	5	5	Problemas com a conexão de internet	Fundamental, manter em futuros eventos	Fundamental, manter em futuros eventos	Não	#TeamJaguatirica	4	não
2020/12/28 9:44:38 AM GMT-3	Ciências biológicas	Graduada/Graduado	Biomedicina	5	Sim	Assisti a programação completa ao vivo	5		Sim	5		Sim	5	5	Problemas com a conexão de internet	Fundamental, manter em futuros eventos	Fundamental, manter em futuros eventos	Não	Não participei :(	5		Parabéns pela inclusão social
2020/12/28 10:19:21 AM GMT-3	Ciências biológicas	Doutoranda (o)	Programa de Pós-graduação em Biologia Molecular e Celular	5	Não	Não assisti à programação completa, apenas assisti o que pude ver ao vivo	4		Sim	4		Sim	5	5	Problemas com a conexão de internet	Fundamental, manter em futuros eventos	Fundamental, manter em futuros eventos	Não	Não participei :(	4				Deixo aqui meu agradecimento pelo evento incrível que nos foi ofertado. Foram dias de muito aprendizado e troca de experiências. Parabéns aos envolvidos na organização!
2020/12/28 10:36:41 AM GMT-3	Biotecnologia	Estudante de graduação	Ensino Médio	5	Sim	Assisti a programação completa ao vivo	5		Sim	5		Não	2	4	Preenchimento das listas de presença	Fundamental, manter em futuros eventos	Fundamental, manter em futuros eventos	Não	Não participei :(	1
2020/12/28 10:38:26 AM GMT-3	Ciências biológicas	Mestranda (o)	Biomédica	5	Sim	Assisti a programação completa ao vivo	5		Sim	5		Não	3	5	Problemas com a conexão de internet	Fundamental, manter em futuros eventos	Fundamental, manter em futuros eventos	Não	Não participei :(	3
2020/12/28 10:43:07 AM GMT-3	Ciências biológicas	Doutora/Doutor	Biotecnologia	5	Sim	Assisti a programação completa ao vivo	5		Sim	5		Sim	5	5	Dificuldade de me concentrar durante o evento	Fundamental, manter em futuros eventos	Fundamental, manter em futuros eventos	Sim	#TeamCobra	5	Amei a criatividade! Essa capacidade de unir ciência a outros temas, instigando curiosidade e participação, sempre contribuirá para o aprendizado leve e criará novos caminhos para acessar diferentes grupos. Parabéns a toda a equipe.	Gostaria de parabenizá-los mais uma vez pela organização do evento e escolha dos temas, atuais e interessantes. Como estou adentrando na bioinformática foi extremamente rico conhecer os caminhos trilhados por outras pessoas e saber das aplicações atuais da área.		Obrigada por trazer algo positivo em meio a um momento tão pesado, poder fazer esse curso a distância, devido ao ano pandêmico, mostra que tudo tem mais de um lado. Que os próximos eventos também façam muito sucesso e que o próximo ano seja cheio de conquistas para toda a equipe.
2020/12/28 10:44:06 AM GMT-3	Engenharia de Bioprocessos e Biotecnologia	Estudante de graduação	Engenharia de Bioprocessos e Biotecnologia	5	Não	Não assisti à programação completa, apenas assisti o que pude ver ao vivo	5		Não	5		Sim	5	5	Dificuldade de me concentrar durante o evento	Fundamental, manter em futuros eventos	Fundamental, manter em futuros eventos	Não	Não participei :(	2
2020/12/28 10:45:45 AM GMT-3	Ciências biológicas	Doutoranda (o)	Ciências Médicas - Mestrado	4	Não	Assisti uma parte da programação ao vivo e parte posteriormente pelos links do YouTube	4		Não	4		Sim	4	5	Problemas com a conexão de internet;Dificuldade de me concentrar durante o evento	Fundamental, manter em futuros eventos	Fundamental, manter em futuros eventos	Não	Não participei :(	3
2020/12/28 11:07:15 AM GMT-3	Ciências biológicas	Estudante de graduação	Ensino Médio	5	Não	Assisti uma parte da programação ao vivo e parte posteriormente pelos links do YouTube	5		Não	5		Não	3	5	Acesso aos e-mails com notícias do I WOB20	Fundamental, manter em futuros eventos	Fundamental, manter em futuros eventos	Não	Não participei :(	3
2020/12/28 11:27:39 AM GMT-3	Ciências biológicas	Doutoranda (o)	Mestre em Farmácia	5	Sim	Assisti uma parte da programação ao vivo e parte posteriormente pelos links do YouTube	5	Sugiro mais eventos como este de forma online, pois desta forma é mais abrangente em relação ao acesso do público externo.	Sim	5		Sim	5	5	Não tive dificuldade.	Fundamental, manter em futuros eventos	Fundamental, manter em futuros eventos	Não	Não participei :(	5		Aprendi muito com este evento. Adorei a organização!		Espero que se repita em outros anos e que seja de forma online para alcançar estudantes de todo o país.
2020/12/28 11:32:17 AM GMT-3	Ciências biológicas	Mestranda (o)	Biomedicina	5	Sim	Assisti a programação completa ao vivo	5		Sim	5		Não	2	5	Nenhum	Fundamental, manter em futuros eventos	Fundamental, manter em futuros eventos	Não	Não participei :(	4
2020/12/28 11:57:20 AM GMT-3	Ciências Farmacêuticas	Pós-doc em andamento	Doutorado em Ciências Farmacêuticas pela Universidade Federal de Ouro Preto	4	Sim	Assisti uma parte da programação ao vivo e parte posteriormente pelos links do YouTube	4		Não	3		Sim	4	4	Preenchimento das listas de presença	Fundamental, manter em futuros eventos	Fundamental, manter em futuros eventos	Não	Não participei :(	2
2020/12/28 12:15:13 PM GMT-3	Biomedicina	Mestranda (o)	Mestrado em Biociências e Fisiopatologia	5	Não	Não assisti à programação completa, apenas assisti o que pude ver ao vivo	5		Não	5		Sim	5	5	nenhuma	Fundamental, manter em futuros eventos	Fundamental, manter em futuros eventos	Sim	#TeamJaguatirica	5
2020/12/28 1:05:38 PM GMT-3	Interdisciplinar	Graduada/Graduado	Biotecnologia	5	Sim	Assisti uma parte da programação ao vivo e parte posteriormente pelos links do YouTube	5		Sim	5		Sim	5	5	Problemas com a conexão de internet;Dificuldade em acessar os links do YouTube;Dificuldade de me concentrar durante o evento	Fundamental, manter em futuros eventos	Fundamental, manter em futuros eventos	Não	Não participei :(	2
2020/12/28 1:16:20 PM GMT-3	Ciências biológicas	Estudante de graduação	Biomedicina	5	Não	Assisti a programação completa pelas gravações no YouTube	5		Não	5		Não	5	5	Preenchimento das listas de presença	Fundamental, manter em futuros eventos	Fundamental, manter em futuros eventos	Não	Não participei :(	5
2020/12/28 1:18:40 PM GMT-3	Ciências biológicas	Doutoranda (o)	Mestrado em Química	5	Sim	Assisti a programação completa ao vivo	5		Sim	5		Sim	5	5	Problemas com a conexão de internet	Fundamental, manter em futuros eventos	Fundamental, manter em futuros eventos	Não	Não participei :(	3
2020/12/28 1:46:19 PM GMT-3	Interdisciplinar	Mestranda (o)	Bacterióloga	5	Sim	Assisti uma parte da programação ao vivo e parte posteriormente pelos links do YouTube	5	Evento maravilhoso	Sim	5	Não	Não	3	5	Problemas com a conexão de internet;Acesso aos e-mails com notícias do I WOB20	Fundamental, manter em futuros eventos	Fundamental, manter em futuros eventos	Não	Não participei :(	2	Não	Evento maravilhoso	Mais tempo	Goste muito
2020/12/28 1:47:28 PM GMT-3	Ciências biológicas	Estudante de graduação	Biomedicina	5	Sim	Assisti a programação completa ao vivo	5	O evento foi sensacional, parabéns a todos!!	Sim	5	Foi incrivel!	Sim	5	5	Não tive	Fundamental, manter em futuros eventos	Fundamental, manter em futuros eventos	Não	Não participei :(	5	-	Foi gratificante participar desse workshop, espero participar dos próximos!	-	Gratidão a todos os organizadores e palestrantes por contribuírem com minha formação acadêmica!
2020/12/28 2:11:42 PM GMT-3	Ciências biológicas	Mestra/Mestre	Mestre em Ciências	5	Sim	Assisti a programação completa ao vivo	5	A programação foi sólida, bastante enriquecedora e de alta qualidade no geral. Não tenho nenhuma crítica ou sugestão a princípio.	Sim	5	Não tenho nenhuma crítica ou sugestão quanto as mesas-redondas, a princípio.	Sim	5	5	Não se aplica.	Fundamental, manter em futuros eventos	Fundamental, manter em futuros eventos	Não	Não participei :(	5	Não tenho nenhuma crítica ou sugestão quanto a 1ª Taça das Casas, a princípio.	No geral, o evento foi muito bom, desde a interface, a organização até o evento das Taças das Casas. Super bem organizado e envolvente. O conteúdo das palestras foi muito bem organizado e explicitado pelos palestrantes, numa linguagem simples e direta. Ponto positivo, considerando que entre os participantes estavam alunos de ensino médico. Conteúdo bem acessível e bem trabalhado.	Não tenho nenhuma contribuição nesse sentido.	Parabéns pelo evento. Deixou uma vontade maior ainda de entrar para o campo da Bioinformática. Evento de alta qualidade e organização. Parabéns a todos que se empenharam para produção, execução e finalização do mesmo. Obrigado.
2020/12/28 2:22:58 PM GMT-3	Ciências biológicas	Graduada/Graduado	Graduação	5	Sim	Assisti uma parte da programação ao vivo e parte posteriormente pelos links do YouTube	5	Adorei toda programação e conteúdo	Não	5	Não	Sim	5	5	Dificuldade em acessar os links do YouTube	Fundamental, manter em futuros eventos	Fundamental, manter em futuros eventos	Não	Não participei :(	5		Conteúdo diversificado e palestrantes experientes	Seguir os horários para não atrasar as palestras seguintes	Obrigada por abrirem esse espaço de grande conhecimento e motivação
2020/12/28 2:35:42 PM GMT-3	Ciências biológicas	Graduada/Graduado	Bacharelado em Ciências Biológicas	5	Sim	Assisti a programação completa pelas gravações no YouTube	5		Sim	5		Não	3	4	Problemas com a conexão de internet;Preenchimento das listas de presença;Acesso aos e-mails com notícias do I WOB20	Fundamental, manter em futuros eventos	Fundamental, manter em futuros eventos	Não	Não participei :(	3
2020/12/28 2:40:39 PM GMT-3	Ciências biológicas	Graduada/Graduado	Graduação	5	Não	Assisti uma parte da programação ao vivo e parte posteriormente pelos links do YouTube	5		Não	5		Sim	5	5	Problemas com a conexão de internet;Dificuldade em acessar os links do YouTube	Fundamental, manter em futuros eventos	Fundamental, manter em futuros eventos	Não	Não participei :(	5		Evento totalmente necessário para atualidade	Seguir os horários das palestras para não atrasar as que vem a seguir	Obrigada por esse espaço para divulgar o conhecimento e motivar novas pessoas para essa área
2020/12/28 2:56:50 PM GMT-3	Ciências biológicas	Estudante de graduação	biotecnologia	5	Sim	Assisti uma parte da programação ao vivo e parte posteriormente pelos links do YouTube	5		Sim	5		Não	3	5	Dificuldade de me concentrar durante o evento	Fundamental, manter em futuros eventos	Fundamental, manter em futuros eventos	Não	#TeamJaguatirica	3
2020/12/28 3:46:09 PM GMT-3	Ciências biológicas	Doutoranda (o)	Biologia Vegetal	5	Não	Não assisti à programação completa, apenas assisti o que pude ver ao vivo	5		Sim	5		Não	1	5	Acesso aos e-mails com notícias do I WOB20	Fundamental, manter em futuros eventos	Fundamental, manter em futuros eventos	Não	Não participei :(	3
2020/12/28 4:17:26 PM GMT-3	Ciências exatas não computacionais	Mestranda (o)	Especialização em Ensino de Matemática	5	Sim	Assisti a programação completa ao vivo	5	Nenhuma crítica ou sugestão quanto à programação do I WOB20	Sim	5	Nenhuma crítica ou sugestão quanto às mesas redondas do I WOB20	Sim	5	5	Problemas com a conexão de internet	Fundamental, manter em futuros eventos	Fundamental, manter em futuros eventos	Não	Não participei :(	3	Nenhuma crítica ou sugestão quanto à 1ª Taça das Casas do I WOB20	Sem elogios	Sem pontos de melhorias para edições futuras	Sem comentários gerais
2020/12/28 4:18:25 PM GMT-3	Interdisciplinar	Estudante de graduação	Biotecnologia	5	Não	Assisti uma parte da programação ao vivo e parte posteriormente pelos links do YouTube	5	Parabéns! Muito bom!	Não	4	O tempo de apresentação das mesas redondas poderia ser menor, para ter mais tempo de debate.	Sim	5	5	Dificuldade de me concentrar durante o evento;Choque de horário com outras atividades	Fundamental, manter em futuros eventos	Fundamental, manter em futuros eventos	Não	Não participei :(	3	Gostaria de ter podido participar :(	A organização foi muito comunicativa e presente, muito bom!	Buscar mais palestrantes mulheres, negros e das regiões norte e nordeste! Já sabemos que no sudeste existem ótimos pesquisadores, vamos dar visibilidade a outras regiões também.
2020/12/28 6:11:18 PM GMT-3	Ciências biológicas	Pós-doc concluído	Zootecnia	5	Sim	Assisti a programação completa ao vivo	5	Parabéns pela organização, escolha dos temas e dos palestrantes. Por favor, promovam mais workshops em bionformática, gerais e temáticos.	Não	5	Achei ótimas as discussões.	Sim	5	5	Preenchimento das listas de presença	Fundamental, manter em futuros eventos	Fundamental, manter em futuros eventos	Não	Não participei :(	1	Não participei	Evento muito bem organizado, excelente escolha dos temas e palestrantes.	Promover outros e temáticos, como por exemplo, análise de RNA-Seq, análise metagenômica	Sou muito grata por ter participado, desejo que continuem empenhados na causa!
2020/12/28 7:16:21 PM GMT-3	Ciências biológicas	Estudante de graduação	Biotecnologia	5	Sim	Assisti uma parte da programação ao vivo e parte posteriormente pelos links do YouTube	5		Sim	4		Sim	4	5	Dificuldade de me concentrar durante o evento	Fundamental, manter em futuros eventos	Fundamental, manter em futuros eventos	Não	Não participei :(	3
2020/12/28 7:49:42 PM GMT-3	Ciência Biomédica	Estudante de graduação	Biomedicina	4	Sim	Assisti a programação completa ao vivo	4		Não	3		Não	2	5	Problemas com a conexão de internet	Fundamental, manter em futuros eventos	Fundamental, manter em futuros eventos	Não	Não participei :(	3		Aprendi bastante! Estou muito grata por ter participado desse evento.
2020/12/28 8:23:57 PM GMT-3	Ciências biológicas	Estudante de graduação	N/A	5	Não	Assisti uma parte da programação ao vivo e parte posteriormente pelos links do YouTube	5		Não	3		Não	5	5	Preenchimento das listas de presença	Fundamental, manter em futuros eventos	Fundamental, manter em futuros eventos	Não	Não participei :(	3
2020/12/28 9:12:43 PM GMT-3	Ciências biológicas	Mestra/Mestre	Programa de pós-graduação em Genética e Biologia Molecular	5	Sim	Assisti a programação completa ao vivo	5		Sim	5		Não	3	5	Problemas com a conexão de internet;Dificuldade de me concentrar durante o evento	Fundamental, manter em futuros eventos	Fundamental, manter em futuros eventos	Sim	#TeamJaguatirica	5
2020/12/28 9:34:44 PM GMT-3	Ciências biológicas	Estudante de ensino médio	Soldador	5	Sim	Assisti a programação completa pelas gravações no YouTube	5		Não	5		Não	3	5	Dificuldade em acessar os links do YouTube	Fundamental, manter em futuros eventos	Fundamental, manter em futuros eventos	Não	Não participei :(	3
2020/12/28 10:48:24 PM GMT-3	Ciências biológicas	Mestranda (o)	xc	3	Sim	Assisti uma parte da programação ao vivo e parte posteriormente pelos links do YouTube	5		Não	5		Sim	5	5	Dificuldade em realizar doações para a campanha beneficente "Projeto X"	Fundamental, manter em futuros eventos	Fundamental, manter em futuros eventos	Não	Não participei :(	5
2020/12/28 10:51:59 PM GMT-3	Ciências biológicas	Estudante de graduação	Farmácia	5	Sim	Assisti a programação completa ao vivo	5		Sim	4		Sim	5	5	Dificuldade de me concentrar durante o evento	Fundamental, manter em futuros eventos	Fundamental, manter em futuros eventos	Não	Não participei :(	4
2020/12/28 11:23:51 PM GMT-3	Ciências biológicas	Mestranda (o)	Ciências Biológicas	5	Sim	Assisti uma parte da programação ao vivo e parte posteriormente pelos links do YouTube	4	Excelente iniciativa!	Sim	4		Não	3	5	Nenhum.	Fundamental, manter em futuros eventos	Fundamental, manter em futuros eventos	Não	Não participei :(	3		Parabéns a galera que responde aos emails!
2020/12/29 12:08:28 AM GMT-3	Ciências biológicas	Mestranda (o)	Ciências Biológicas	4	Sim	Assisti uma parte da programação ao vivo e parte posteriormente pelos links do YouTube	5		Sim	4		Sim	5	5	Problemas com a conexão de internet;Dificuldade de me concentrar durante o evento	Fundamental, manter em futuros eventos	Fundamental, manter em futuros eventos	Não	Não participei :(	5
2020/12/29 12:08:57 AM GMT-3	Ciências biológicas	Mestranda (o)	Ciências Biológicas	4	Sim	Assisti uma parte da programação ao vivo e parte posteriormente pelos links do YouTube	5		Sim	4		Sim	5	5	Problemas com a conexão de internet;Dificuldade de me concentrar durante o evento	Fundamental, manter em futuros eventos	Fundamental, manter em futuros eventos	Não	Não participei :(	5
2020/12/29 10:32:25 AM GMT-3	Ciências biológicas	Doutoranda (o)	Genética e Biologia Molecular	5	Sim	Assisti uma parte da programação ao vivo e parte posteriormente pelos links do YouTube	5		Não	5		Não	3	5	Acesso aos e-mails com notícias do I WOB20	Fundamental, manter em futuros eventos	Fundamental, manter em futuros eventos	Não	Não participei :(	3
2020/12/29 10:43:43 AM GMT-3	Ciências biológicas	Doutoranda (o)	Genética e Biologia molecular	5	Não	Assisti uma parte da programação ao vivo e parte posteriormente pelos links do YouTube	5		Não	3		Não	3	5	Dificuldade de me concentrar durante o evento	Fundamental, manter em futuros eventos	Fundamental, manter em futuros eventos	Não	Não participei :(	3
2020/12/29 11:22:41 AM GMT-3	Ciências biológicas	Estudante de graduação	...	4	Sim	Assisti a programação completa ao vivo	4		Sim	4		Sim	4	4	Problemas com a conexão de internet	Fundamental, manter em futuros eventos	Fundamental, manter em futuros eventos	Não	Não participei :(	4
2020/12/29 11:31:48 AM GMT-3	Ciências biológicas	Estudante de graduação	...	5	Sim	Assisti a programação completa ao vivo	5	Ótima.	Sim	5	Muito bom.	Sim	5	5	Problemas com a conexão de internet	Fundamental, manter em futuros eventos	Fundamental, manter em futuros eventos	Não	Não participei :(	3
2020/12/29 11:37:40 AM GMT-3	Ciências biológicas	Doutoranda (o)	Mestrado	5	Sim	Assisti a programação completa ao vivo	5		Não	3		Não	3	5	Acesso aos e-mails com notícias do I WOB20	Fundamental, manter em futuros eventos	Fundamental, manter em futuros eventos	Não	Não participei :(	3		Parabéns a todos pela iniciativa do curso! Fiquei muito satisfeita, agregou muito a mim como profissional. Além de tudo incluiu pessoas de outros estados e isso é muito bom.		Obrigada a todos pelo empenho! Aguardamos o próximo!
2020/12/29 11:51:26 AM GMT-3	Ciências biológicas	Estudante de graduação	Gestão de Pessoas	5	Sim	Assisti uma parte da programação ao vivo e parte posteriormente pelos links do YouTube	5	Gostei muito, esperava algum outro tema específico, mas os que foram abordados são de muita importância.	Sim	5	As discussões foram bem conduzidas.	Sim	5	5	Preenchimento das listas de presença;Acesso aos e-mails com notícias do I WOB20	Fundamental, manter em futuros eventos	Fundamental, manter em futuros eventos	Não	Não participei :(	5	Não	Excelente evento, já quero outro.	Só deixem no canal os vídeos do evento todo por favor.	Justiça social, esforço, não desistir, luta, compreensão, agir, equidade, amor, fé <3
2020/12/29 11:53:17 AM GMT-3	Ciências biológicas	Doutoranda (o)	Genética e Biologia Molecular	5	Não	Assisti uma parte da programação ao vivo e parte posteriormente pelos links do YouTube	5		Não	3		Não	3	5	Dificuldade de me concentrar durante o evento	Fundamental, manter em futuros eventos	Fundamental, manter em futuros eventos	Não	Não participei :(	3
2020/12/29 11:58:42 AM GMT-3	Ciências biológicas	Mestra/Mestre	Genética	5	Não	Assisti uma parte da programação ao vivo e parte posteriormente pelos links do YouTube	5		Sim	5		Não	3	5	Problemas com a conexão de internet	Fundamental, manter em futuros eventos	Fundamental, manter em futuros eventos	Não	Não participei :(	3
2020/12/29 12:38:56 PM GMT-3	Ciências da Saúde	Graduada/Graduado	Farmácia	5	Sim	Assisti a programação completa ao vivo	4		Sim	5		Não	2	5	Dificuldade de me concentrar durante o evento	Fundamental, manter em futuros eventos	Fundamental, manter em futuros eventos	Não	Não participei :(	3
2020/12/29 1:39:57 PM GMT-3	Ciências biológicas	Doutoranda (o)	Mestrado em Virologia	5	Sim	Assisti a programação completa ao vivo	5		Sim	5		Não	3	5	NA	Fundamental, manter em futuros eventos	Fundamental, manter em futuros eventos	Não	Não participei :(	3	NA
2020/12/29 3:20:15 PM GMT-3	Ciências da computação	Mestra/Mestre	Ciências da Computação	5	Sim	Assisti uma parte da programação ao vivo e parte posteriormente pelos links do YouTube	4		Sim	4		Sim	5	5	Nenhum	Fundamental, manter em futuros eventos	Fundamental, manter em futuros eventos	Sim	#TeamJaguatirica	5		O evento on line foi muito bom e bem elaborado mesmo nesse louco cenário de pandemia.	Por ora nenhum.	O evento on line foi muito bom e bem elaborado mesmo nesse louco cenário de pandemia.
2020/12/29 3:27:42 PM GMT-3	Ciências biológicas	Mestranda (o)	Ciências Biológicas	4	Sim	Assisti a programação completa ao vivo	4	Parabéns a comissão organizadora, foi muito bem realizado.	Não	4		Sim	5	5	Dificuldade de me concentrar durante o evento	Fundamental, manter em futuros eventos	Fundamental, manter em futuros eventos	Sim	#TeamCapivara	5		Parabéns pelas interações principalmente com a taça das casas, que foi um diferencial que nos proporcionou uma maior interação com o evento e o deixou mais interessante ainda.	Planejar um pouco mais essas atividades interativas, tive a impressão que a taça das casas foi meio em cima da hora.	Parabéns! Equipe e sucesso para todos vocês que coloaboraram e colaboram para o desenvolvimento da carreria de outros iniciantes no mundo dos biobits. Bem como aos professores que estão encabeçando e também se dispõe, proporcionando assim eventos de qualidade para pessoas que não são de MG, assim como eu hehehe e Obrigada. Abs.
2020/12/29 3:33:59 PM GMT-3	Ciências biológicas	Mestra/Mestre	Biologia Vegetal	5	Sim	Assisti uma parte da programação ao vivo e parte posteriormente pelos links do YouTube	5	Achei as palestras sobre trabalho otimas	Não	4		Sim	3	5	Preenchimento das listas de presença	Fundamental, manter em futuros eventos	Fundamental, manter em futuros eventos	Não	Não participei :(	3		Achei legal os pontos positivos e negativos da area academica que um dos palestranes disse		Gostei das palestras sobre atuação no mercado de trabalho. Sempre devia ter isso. Achei legal os pontos positivos e negativos da area academica que um dos palestranes disse
2020/12/29 3:50:14 PM GMT-3	Ciências da Saúde	Doutoranda (o)	Genética e Biologia Molecular	5	Não	Assisti uma parte da programação ao vivo e parte posteriormente pelos links do YouTube	4		Sim	5		Sim	5	5	Problemas com a conexão de internet;Dificuldade de me concentrar durante o evento;Alinhamento pessoal entre agenda profissional e o evento	Fundamental, manter em futuros eventos	Fundamental, manter em futuros eventos	Não	Não participei :(	3
2020/12/29 4:09:55 PM GMT-3	Ciências biológicas	Graduada/Graduado	Microbiologia	5	Sim	Assisti uma parte da programação ao vivo e parte posteriormente pelos links do YouTube	5	O evento foi excelente	Sim	5		Sim	5	5	Não tive problemas	Fundamental, manter em futuros eventos	Fundamental, manter em futuros eventos	Sim	#TeamCapivara	5		O evento foi excelente e de grande importância para todos das comunidade científica tanto quanto para quem não faz parte ainda.	Talvez poderiam disponibilizar mais dias para o evento e algum intervalo entre as palestras para eventuais atrasos .	Interessante nesse formato de evento, puderam participar diversas pessoas de vários cantos do país e do mundo, mas ainda assim eu gostaria de um dia participar desse evento presencial e fazer parte desse comunidade. Estão todos de parabéns!
2020/12/29 4:16:46 PM GMT-3	Ciências biológicas	Graduada/Graduado	Microbiologia	5	Sim	Assisti uma parte da programação ao vivo e parte posteriormente pelos links do YouTube	5		Sim	5		Sim	5	5	Nao tive problemas	Fundamental, manter em futuros eventos	Fundamental, manter em futuros eventos	Sim	#TeamCapivara	5
2020/12/29 5:11:14 PM GMT-3	Ciências biológicas	Graduada/Graduado	Ciências Biológicas	5	Sim	Assisti a programação completa ao vivo	5		Sim	5		Não	3	5	Dificuldade em realizar doações para a campanha beneficente "Projeto X"	Fundamental, manter em futuros eventos	Fundamental, manter em futuros eventos	Não	Não participei :(	3
2020/12/29 5:30:49 PM GMT-3	Ciências biológicas	Estudante de graduação	...	4	Sim	Assisti a programação completa ao vivo	4		Sim	4		Sim	4	4	Problemas com a conexão de internet	Fundamental, manter em futuros eventos	Fundamental, manter em futuros eventos	Não	Não participei :(	3
2020/12/29 5:54:56 PM GMT-3	Ciências biológicas	Mestranda (o)	Licenciatura em Ciências Biológicas	5	Sim	Assisti uma parte da programação ao vivo e parte posteriormente pelos links do YouTube	5		Não	4		Não	2	5	Acesso aos e-mails com notícias do I WOB20	Fundamental, manter em futuros eventos	Fundamental, manter em futuros eventos	Não	Não participei :(	2		Parabéns pelo evento! Foi muito bom.
2020/12/29 6:37:57 PM GMT-3	Interdisciplinar	Doutoranda (o)	Mestrado em Endocrinologia	5	Sim	Assisti uma parte da programação ao vivo e parte posteriormente pelos links do YouTube	5		Sim	5		Não	1	5	Problemas com a conexão de internet	Fundamental, manter em futuros eventos	Fundamental, manter em futuros eventos	Não	Não participei :(	5
2020/12/29 11:34:03 PM GMT-3	Ciências biológicas	Estudante de graduação	biologia	5	Sim	Assisti a programação completa ao vivo	5		Sim	5		Não	1	5	Acesso aos e-mails com notícias do I WOB20	Fundamental, manter em futuros eventos	Fundamental, manter em futuros eventos	Não	Não participei :(	5
2020/12/29 11:36:29 PM GMT-3	Ciências biológicas	Doutora/Doutor	Medicina Tropical	5	Sim	Assisti uma parte da programação ao vivo e parte posteriormente pelos links do YouTube	5		Não	5		Sim	5	5	Preenchimento das listas de presença	Fundamental, manter em futuros eventos	Fundamental, manter em futuros eventos	Não	Não participei :(	5
2020/12/30 1:23:42 AM GMT-3	Ciências biológicas	Doutoranda (o)	Mestrado em Biotecnologia	5	Não	Assisti uma parte da programação ao vivo e parte posteriormente pelos links do YouTube	5	O chat deveria ser usado apenas para comunicações importantes. É deselegante e desnecessário deixar o chat livre para comentários aleatórios e avalanches de "boa tarde/boa noite/ancioso para começar/o tema é legal/etc"	Não	5		Não	1	5	Problemas com a conexão de internet;Dificuldade em realizar doações para a campanha beneficente "Projeto X";em alguns momentos os tradutores de libras desviaram a atenção. Seria útil se o recurso de interpretação em libras pudesse ser opcionalmente selecionado, mas entendo a dificuldade técnica na mídia que foi usada (youtube)	Fundamental, manter em futuros eventos	Fundamental, manter em futuros eventos	Não	Não participei :(	1	Achei confuso. Sugiro criar material suplementar explicando o funcionamento.	Um dos melhores eventos online que já participei - quiçá o melhor. Ter esse tipo de contato entre pesquisadores renomados e iniciantes, livre, gratuito e de fácil acesso é uma das melhores formas de gerar rede de interação para os cientistas e para industria, além de mostrar a vida e a carreira de colegas fora do campo acadêmico. Com certeza sou um bioinformata melhor após o WOB20.	Manter material suplementar explicando os demais projetos que são apresentados no evento, para garantir maior entendimento dos mesmos.	Não virei bioinformata por amor, mas sou um bioinformata que ama o que faz.
2020/12/30 4:45:26 AM GMT-3	Ciências biológicas	Mestranda (o)	Ciências Biológicas	5	Sim	Assisti a programação completa ao vivo	5		Sim	4		Sim	3	5	Preenchimento das listas de presença	Fundamental, manter em futuros eventos	Fundamental, manter em futuros eventos	Não	Não participei :(	3
2020/12/30 6:26:44 AM GMT-3	Ciências biológicas	Mestra/Mestre	Mestrado em Ciências da Saúde	5	Sim	Assisti uma parte da programação ao vivo e parte posteriormente pelos links do YouTube	5	Meu mestrado foi baseado em análises de bioinformática, onde fiz análises interessantes sobre DAMPs e seus receptores em humanos, voltados para doenças como câncer, diabetes e neurodegenerativas. Este evento foi um evento excelente que trouxe contribuições relevantes para meu doutorado. Vocês estão de parabéns! Que venha o próximo!🙏🏽🙏🏽🙏🏽🙏🏽	Sim	5	Achei a proposta das mesas redondas muito boa! Mostrar os caminhos e as oportunidades para quem tem interesse em investir pesado nessa área, foi de grande importância. O quão vasta é essa área.	Sim	5	5	Problemas com a conexão de internet	Fundamental, manter em futuros eventos	Fundamental, manter em futuros eventos	Não	Não participei :(	3	Não consegui acessar.	Evento excelente, que me trouxe grande aprendizado. Parabéns!!!!!	Não tenho nada a sugerir, achei o evento fantástico.	Foi um sucesso!
2020/12/30 8:43:42 AM GMT-3	Ciências biológicas	Estudante de graduação	Ciências Biológicas	5	Sim	Assisti a programação completa ao vivo	5		Sim	5		Sim	5	5	Nenhuma problema	Fundamental, manter em futuros eventos	Fundamental, manter em futuros eventos	Não	Não participei :(	5
2020/12/30 10:21:38 AM GMT-3	Ciências biológicas	Doutoranda (o)	Mestrado em Biotecnologia	5	Sim	Assisti a programação completa ao vivo	5		Sim	5		Não	1	5	Problemas com a conexão de internet;Dificuldade em realizar doações para a campanha beneficente "Projeto X";Eu tinha que voltar para a página do evento para conseguir assistir a próxima palestra, pois não iniciava automaticamente ao finalizar a primeira	Fundamental, manter em futuros eventos	Fundamental, manter em futuros eventos	Não	Não participei :(	2	Eu na verdade fiquei sem entender como saber a minha casa, então acabei não participando
2020/12/30 10:39:49 AM GMT-3	Ciências biológicas	Estudante de graduação	Graduando em Ciências Biológicas	4	Sim	Assisti uma parte da programação ao vivo e parte posteriormente pelos links do YouTube	4		Não	2		Não	2	4	Dificuldade de me concentrar durante o evento;Preenchimento das listas de presença	Fundamental, manter em futuros eventos	Fundamental, manter em futuros eventos	Não	Não participei :(	2
2020/12/30 12:09:18 PM GMT-3	Ciências da computação	Graduada/Graduado	Tecnologia em Análise e Desenvolvimento de Sistemas	5	Sim	Assisti uma parte da programação ao vivo e parte posteriormente pelos links do YouTube	5	Foi muito proveitoso.	Não	4	gostei das que eu assisti.	Sim	5	5	Problemas com a conexão de internet;Dificuldade de me concentrar durante o evento	Fundamental, manter em futuros eventos	Fundamental, manter em futuros eventos	Sim	#TeamCobra	5	Aprendi bastante	Gostei muito do evento,continuem assim.	Acho que vcs só tem a melhorar	Foi muito gratificante aprender com todos.
2020/12/30 4:39:42 PM GMT-3	Biomedicina	Pós-doc em andamento	Ciências da Saúde	5	Sim	Assisti a programação completa ao vivo	5		Sim	5		Sim	5	5	Nenhum	Fundamental, manter em futuros eventos	Fundamental, manter em futuros eventos	Sim	#TeamCobra	5		Organização muito boa. Participei de outros eventos online este ano e nenhum teve esta organização. Parabéns.
2020/12/30 4:55:09 PM GMT-3	Ciências biológicas	Doutoranda (o)	Biomedicina	4	Sim	Assisti uma parte da programação ao vivo e parte posteriormente pelos links do YouTube	4		Não	3		Sim	5	3	Problemas com a conexão de internet;Dificuldade em acessar os links do YouTube	Fundamental, manter em futuros eventos	Fundamental, manter em futuros eventos	Não	Não participei :(	3		Bem programado	Travou bastante, e audio ruim	Me serviu de aprendizado, adorei
2020/12/30 5:03:52 PM GMT-3	Ciências biológicas	Mestranda (o)	Ciências Biológicas	5	Sim	Assisti a programação completa ao vivo	5		Sim	5		Sim	5	5	Dificuldade de me concentrar durante o evento	Fundamental, manter em futuros eventos	Fundamental, manter em futuros eventos	Não	Não participei :(	5
2020/12/30 5:56:48 PM GMT-3	Ciências biológicas	Mestra/Mestre	Mestrado em Ciências da Saúde	5	Sim	Assisti uma parte da programação ao vivo e parte posteriormente pelos links do YouTube	5	Meu mestrado foi baseado em análises de bioinformática, onde fiz análises interessantes sobre DAMPs e seus receptores em humanos, voltados para doenças como câncer, diabetes e neurodegenerativas. Este evento foi um evento excelente que trouxe contribuições relevantes para meu doutorado. Vocês estão de parabéns! Que venha o próximo!🙏🏽🙏🏽🙏🏽	Sim	5	Achei a proposta das mesas redondas muito boa! Mostrar os caminhos e as oportunidades para quem tem interesse em investir pesado nessa área, foi de grande importância. O quão vasta é essa área.	Sim	5	5	Problemas com a conexão de internet	Fundamental, manter em futuros eventos	Fundamental, manter em futuros eventos	Não	Não participei :(	3	Não consegui acessar.	Evento excelente, que me trouxe grande aprendizado. Parabéns!!!!!	Não tenho nada a sugerir, achei o evento fantástico.	Foi um sucesso! Gratidão
2020/12/30 7:24:04 PM GMT-3	Ciências biológicas	Estudante de graduação	Ciências Biológicas	5	Sim	Assisti uma parte da programação ao vivo e parte posteriormente pelos links do YouTube	5		Não	4		Não	1	5	Problemas com a conexão de internet	Fundamental, manter em futuros eventos	Fundamental, manter em futuros eventos	Não	Não participei :(	1
2020/12/31 12:00:59 AM GMT-3	Ciências biológicas	Doutoranda (o)	Biologia de Agentes Infecciosos e Parasitários	5	Sim	Assisti uma parte da programação ao vivo e parte posteriormente pelos links do YouTube	5		Não	5		Sim	5	5	Problemas com a conexão de internet	Fundamental, manter em futuros eventos	Fundamental, manter em futuros eventos	Não	Não participei :(	3
2020/12/31 2:33:39 AM GMT-3	Ciências biológicas	Mestranda (o)	Bacharelado em Ciências Biológicas	5	Sim	Assisti uma parte da programação ao vivo e parte posteriormente pelos links do YouTube	5	Não. Tudo maravilhoso! Obrigada e parabéns pela iniciativa.	Sim	5	Não.	Não	3	5	Dificuldade de me concentrar durante o evento	Fundamental, manter em futuros eventos	Fundamental, manter em futuros eventos	Não	Não participei :(	5	Não.
2020/12/31 1:59:54 PM GMT-3	Ciências biológicas	Doutoranda (o)	Mestrado em Meio Ambiente e Desenvolvimento Regional	5	Sim	Assisti a programação completa ao vivo	5		Não	5		Sim	4	5	Acesso aos e-mails com notícias do I WOB20	Fundamental, manter em futuros eventos	Fundamental, manter em futuros eventos	Não	Não participei :(	3
2021/01/01 1:01:32 AM GMT-3	Ciências biológicas	Graduada/Graduado	Ciências Biológicas	5	Sim	Assisti a programação completa pelas gravações no YouTube	5		Sim	5		Não	1	5	Dificuldade de me concentrar durante o evento	Fundamental, manter em futuros eventos	Fundamental, manter em futuros eventos	Não	Não participei :(	1
2021/01/01 12:33:58 PM GMT-3	Biotecnologia	Estudante de graduação	Biotecnologia	4	Não	Assisti uma parte da programação ao vivo e parte posteriormente pelos links do YouTube	4	Adorei os conteúdos e o formato. Talvez tenha sido estranho a princípio por ser algo mais novo pra mim, mas com certeza terão melhorias e ainda mais conteúdo nos próximos eventos.	Não	4		Sim	5	4	Problemas com a conexão de internet;Dificuldade de me concentrar durante o evento	Fundamental, manter em futuros eventos	Fundamental, manter em futuros eventos	Não	Não participei :(	3		Conteúdo sensacional! Estão de parabéns	Adoraria minicursos
2021/01/01 6:09:12 PM GMT-3	Biomedicina	Graduada/Graduado	Bacharel em Biomedicina	5	Sim	Assisti uma parte da programação ao vivo e parte posteriormente pelos links do YouTube	4		Sim	5		Não	3	5	Problemas com a conexão de internet	Fundamental, manter em futuros eventos	Foi bom, mas evitar em futuros eventos	Não	Não participei :(	3
2021/01/01 8:50:33 PM GMT-3	Ciências biológicas	Doutoranda (o)	Zoologia	5	Sim	Assisti a programação completa ao vivo	5		Sim	5		Sim	5	5	Preenchimento das listas de presença;Dificuldade em realizar doações para a campanha beneficente "Projeto X"	Fundamental, manter em futuros eventos	Fundamental, manter em futuros eventos	Não	Não participei :(	5
2021/01/01 8:50:52 PM GMT-3	Ciências biológicas	Doutoranda (o)	Zoologia	5	Sim	Assisti a programação completa ao vivo	5		Sim	5		Sim	5	5	Preenchimento das listas de presença;Dificuldade em realizar doações para a campanha beneficente "Projeto X"	Fundamental, manter em futuros eventos	Fundamental, manter em futuros eventos	Não	Não participei :(	5
2021/01/01 9:00:20 PM GMT-3	Ciências biológicas	Pós-doc concluído	2018	5	Sim	Assisti uma parte da programação ao vivo e parte posteriormente pelos links do YouTube	5		Sim	5		Sim	5	5	nenhuma	Fundamental, manter em futuros eventos	Fundamental, manter em futuros eventos	Não	Não participei :(	4
2021/01/02 9:33:20 AM GMT-3	Ciências biológicas	Pós-doc em andamento	Microbiologia Agrícola	4	Não	Não assisti à programação completa, apenas assisti o que pude ver ao vivo	4		Sim	4		Não	3	3	Problemas com a conexão de internet	Fundamental, manter em futuros eventos	Fundamental, manter em futuros eventos	Sim	#TeamCobra	4
2021/01/02 11:32:27 AM GMT-3	Biomedicina	Estudante de graduação	Graduação em progresso	5	Sim	Assisti uma parte da programação ao vivo e parte posteriormente pelos links do YouTube	5		Sim	5		Sim	5	5	Acesso aos e-mails com notícias do I WOB20	Fundamental, manter em futuros eventos	Fundamental, manter em futuros eventos	Não	Não participei :(	5
2021/01/02 12:40:54 PM GMT-3	Ciências biológicas	Pós-doc concluído	Especialização em Nutrigenética & Nutrigenômica	5	Sim	Assisti uma parte da programação ao vivo e parte posteriormente pelos links do YouTube	5	Ampliar o leque de abordagens da BIOINF como ferramenta na INOVAÇÃO E EMPREENDEDORISMO (do acadêmico ao profissional)	Sim	4		Sim	5	5	nenhuma	Fundamental, manter em futuros eventos	Fundamental, manter em futuros eventos	Não	Não participei :(	3	A pergunta: quão satisfeito você ficou com a Taça ... não deveria ser obrigatória pois quem não participou marca aleatoriamente e incute falso resultado ao evento.	parabéns	Ampliar para aplicações na inovação e empreendedorismo não é moda é fundamental para sair da esfera acadêmica para o mundo profissional...	no seu coração é ótimo.... rsrsrs sucesso e parabéns a nos cientistas pela vontade de estudar e fazer diferente neste mundo loucoooo
2021/01/02 1:13:30 PM GMT-3	Ciências biológicas	Estudante de graduação	Ciências Biológicas bacharelado - UFG	5	Sim	Assisti uma parte da programação ao vivo e parte posteriormente pelos links do YouTube	5		Sim	5		Não	3	5	Problemas com a conexão de internet;Dificuldade de me concentrar durante o evento	Fundamental, manter em futuros eventos	Fundamental, manter em futuros eventos	Não	Não participei :(	3
2021/01/02 2:52:44 PM GMT-3	Agronomia	Estudante de graduação	Quinto Período	5	Sim	Assisti a programação completa ao vivo	5		Sim	5		Sim	5	5	Preenchimento das listas de presença	Fundamental, manter em futuros eventos	Fundamental, manter em futuros eventos	Não	Não participei :(	5
2021/01/03 3:04:01 PM GMT-3	Biomedicina	Mestranda (o)	Bacharelado	5	Sim	Assisti uma parte da programação ao vivo e parte posteriormente pelos links do YouTube	5		Sim	5		Não	5	5	Problemas com a conexão de internet	Fundamental, manter em futuros eventos	Fundamental, manter em futuros eventos	Não	Não participei :(	5
2021/01/03 5:49:37 PM GMT-3	Ciências Agrárias	Mestranda (o)	Medicina Veterinária	4	Sim	Assisti a programação completa ao vivo	3		Sim	5		Não	1	5	Preenchimento das listas de presença	Fundamental, manter em futuros eventos	Fundamental, manter em futuros eventos	Não	Não participei :(	3
2021/01/03 6:53:24 PM GMT-3	Ciências da Sáude	Doutora/Doutor	Biociências e Fisiopatologia	4	Sim	Assisti uma parte da programação ao vivo e parte posteriormente pelos links do YouTube	4		Não	4		Não	3	5	Problemas com a conexão de internet	Fundamental, manter em futuros eventos	Fundamental, manter em futuros eventos	Não	Não participei :(	4
2021/01/03 6:56:59 PM GMT-3	Ciências da Saude	Doutora/Doutor	Biociências e Fisiopatologia	4	Sim	Assisti uma parte da programação ao vivo e parte posteriormente pelos links do YouTube	4		Não	4		Não	3	5	Problemas com a conexão de internet	Fundamental, manter em futuros eventos	Fundamental, manter em futuros eventos	Não	Não participei :(	2
2021/01/03 6:57:09 PM GMT-3	Ciências biológicas	Doutoranda (o)	Mestrado em Genética e Melhoramento	3	Sim	Assisti uma parte da programação ao vivo e parte posteriormente pelos links do YouTube	4		Sim	3		Sim	3	4	Problemas com a conexão de internet	Fundamental, manter em futuros eventos	Fundamental, manter em futuros eventos	Não	Não participei :(	1
2021/01/03 8:37:23 PM GMT-3	Ciências biológicas	Estudante de graduação	Biotecnologia	5	Sim	Assisti a programação completa ao vivo	5		Sim	5		Não	3	5	Acesso aos e-mails com notícias do I WOB20	Fundamental, manter em futuros eventos	Fundamental, manter em futuros eventos	Não	Não participei :(	3
2021/01/03 8:50:06 PM GMT-3	Ciências biológicas	Estudante de graduação	Biotecnologia	5	Sim	Assisti a programação completa ao vivo	5		Sim	5		Não	3	5	Problemas com a conexão de internet	Fundamental, manter em futuros eventos	Fundamental, manter em futuros eventos	Não	Não participei :(	3
2021/01/03 9:28:14 PM GMT-3	Ciências biológicas	Mestra/Mestre	BIOLOGIA E BIOTECNOLOGIA DE MICRORGANISMOS	5	Sim	Assisti uma parte da programação ao vivo e parte posteriormente pelos links do YouTube	5		Não	4		Não	3	5	Problemas com a conexão de internet	Fundamental, manter em futuros eventos	Fundamental, manter em futuros eventos	Não	Não participei :(	3
2021/01/04 1:08:25 AM GMT-3	Ciências biológicas	Mestra/Mestre	Programa de Pós-graduação em Biociências	4	Sim	Assisti uma parte da programação ao vivo e parte posteriormente pelos links do YouTube	4	no início, as trocas de sala entre as palestras e mesa redonda foi um pouco confuso, mas nada que atrapalhasse muito. gostei muito da didática da maioria dos palestrantes e dos assuntos abordados.	Sim	4		Não	3	4	acho que a combinação de ser online e as longas horas seguidas por dia facilitaram um pouco a dispersão da atenção. era necessário forçar uma concentração depois da terceira palestra	Fundamental, manter em futuros eventos	Fundamental, manter em futuros eventos	Não	Não participei :(	3	optei por não participar, embora ache interessante essas dinâmicas nos eventos	os organizadores foram empenhados e bem sucedidos. não tive problemas com os emails, acessos aos links, formulários... a inclusão dos intérpretes de libras foi outro ponto positivo	o tempo do evento por dia. participei de outro workshop online que os organizadores dividiram em 2 tempos de +-3 horas cada com um intervalo de 40-60 minutos entre eles (variava de acordo com o avanço das palestras no dia). apesar de ficar um evento mais longo (oficialmente começava 13 h e ia até 16 h e o segundo tempo começava 17 h e ia até 20 h ) era mentalmente menos cansativo por causa do int…	parabéns aos organizadores, aos palestrantes e aos participantes das mesas. espero pelo próximo evento :)
2021/01/04 9:06:39 AM GMT-3	Ciências biológicas	Doutoranda (o)	Mestrado em Zoologia	5	Não	Assisti uma parte da programação ao vivo e parte posteriormente pelos links do YouTube	4		Não	5		Não	3	5	Problemas com a conexão de internet;Dificuldade de me concentrar durante o evento	Fundamental, manter em futuros eventos	Fundamental, manter em futuros eventos	Não	Não participei :(	3
2021/01/04 12:41:41 PM GMT-3	Ciências biológicas	Doutoranda (o)	Mestrado em Bioquímica	5	Sim	Assisti a programação completa ao vivo	5		Sim	5		Sim	3	5	Dificuldade de me concentrar durante o evento;Dificuldade em realizar doações para a campanha beneficente "Projeto X"	Fundamental, manter em futuros eventos	Fundamental, manter em futuros eventos	Sim	#TeamCapivara	5
2021/01/04 2:04:04 PM GMT-3	Ciências biológicas	Estudante de graduação	Nenhuma	5	Não	Assisti uma parte da programação ao vivo e parte posteriormente pelos links do YouTube	5	Excelente	Não	5		Não	4	5	Acesso aos e-mails com notícias do I WOB20	Fundamental, manter em futuros eventos	Fundamental, manter em futuros eventos	Sim	#TeamJacaré	5
2021/01/04 2:04:49 PM GMT-3	Ciências biológicas	Estudante de graduação	Nenhuma	5	Não	Assisti uma parte da programação ao vivo e parte posteriormente pelos links do YouTube	5	Excelente	Não	5		Não	4	5	Acesso aos e-mails com notícias do I WOB20	Fundamental, manter em futuros eventos	Fundamental, manter em futuros eventos	Sim	#TeamJacaré	5
2021/01/04 4:28:14 PM GMT-3	Interdisciplinar	Doutoranda (o)	Mestrado em Neurociências e Comportamento	5	Sim	Assisti uma parte da programação ao vivo e parte posteriormente pelos links do YouTube	5	Gostaria de ver mais coisas sobre metagenomica	Sim	5		Não	3	5	Acesso aos e-mails com notícias do I WOB20	Fundamental, manter em futuros eventos	Fundamental, manter em futuros eventos	Não	Não participei :(	3		A iniciativa do evento ser on-line foi muito boa, visto que assim a abrangência do evento foi maior e oportunizou a participação de mais pessoas.		Façam mais eventos on-line :)
2021/01/04 9:08:23 PM GMT-3	Ciências biológicas	Graduada/Graduado	Ensino Médio	5	Sim	Assisti uma parte da programação ao vivo e parte posteriormente pelos links do YouTube	5		Sim	5		Não	4	5	Dificuldade de me concentrar durante o evento	Fundamental, manter em futuros eventos	Fundamental, manter em futuros eventos	Não	Não participei :(	4		Evento maravilhoso e completo de informações	Manter as apresentações online pra que todos possam ter acesso	quero participar todos os anos!
2021/01/05 1:35:18 AM GMT-3	Ciências exatas não computacionais	Estudante de graduação	Engenharia agrícola e ambiental	5	Sim	Assisti uma parte da programação ao vivo e parte posteriormente pelos links do YouTube	5	Perfeita, explicativo e muito bem elaborado	Sim	5	Muito bom	Sim	5	5	Problemas com a conexão de internet	Fundamental, manter em futuros eventos	Fundamental, manter em futuros eventos	Não	Não participei :(	5
2021/01/05 11:41:48 AM GMT-3	Ciências biológicas	Mestra/Mestre	Manejo e Conservação de Ecossistemas	5	Sim	Assisti a programação completa pelas gravações no YouTube	5		Não	4		Não	3	5	Dificuldade de me concentrar durante o evento	Fundamental, manter em futuros eventos	Fundamental, manter em futuros eventos	Não	Não participei :(	3
2021/01/05 12:57:13 PM GMT-3	Ciências biológicas	Doutoranda (o)	Ciências Biológicas	5	Sim	Assisti uma parte da programação ao vivo e parte posteriormente pelos links do YouTube	5		Não	4	o horário das mesas redondas dificultou para que pudesse acompanhar	Sim	5	5	Problemas com a conexão de internet	Fundamental, manter em futuros eventos	Fundamental, manter em futuros eventos	Sim	#TeamCobra	4
2021/01/05 1:02:56 PM GMT-3	Ciências biológicas	Doutoranda (o)	Ciências Biológicas	5	Sim	Assisti uma parte da programação ao vivo e parte posteriormente pelos links do YouTube	5		Não	4		Sim	5	5	Problemas com a conexão de internet	Fundamental, manter em futuros eventos	Fundamental, manter em futuros eventos	Sim	#TeamCobra	4
2021/01/05 2:13:43 PM GMT-3	Biomedicina	Mestranda (o)	Mestrado em Biologia Molecular e bioquímica estrutural - Programa de Pós graduação em Ciências Biológicas - UFOP	4	Sim	Assisti uma parte da programação ao vivo e parte posteriormente pelos links do YouTube	4		Não	4		Sim	4	4	Problemas com a conexão de internet;Dificuldade em acessar os links do YouTube	Fundamental, manter em futuros eventos	Fundamental, manter em futuros eventos	Não	Não participei :(	2
2021/01/05 2:36:44 PM GMT-3	Ciências biológicas	Mestranda (o)	Bacharel	4	Sim	Assisti a programação completa ao vivo	4		Sim	4		Não	3	5	Dificuldade de me concentrar durante o evento	Fundamental, manter em futuros eventos	Fundamental, manter em futuros eventos	Não	#TeamCapivara	3
2021/01/05 5:31:42 PM GMT-3	Ciências biológicas	Doutora/Doutor	Doutorado em Neurociências e Biologia Celular	5	Sim	Assisti uma parte da programação ao vivo e parte posteriormente pelos links do YouTube	5	O WOB deve continuar, também, on line em outras edições, mesmo que também seja presencial. A experiência foi ótima. Tem muitos interessados em regiões distantes, e esse formato pode alcançá-los, e divulgar a Bioinformática.	Sim	5		Sim	5	5	Preenchimento das listas de presença	Fundamental, manter em futuros eventos	Fundamental, manter em futuros eventos	Não	Não participei :(	5		Tudo muito organizado	Ampliar o alcance do evento	Muito obrigada pela oportunidade
2021/01/05 5:49:56 PM GMT-3	Ciências biológicas	Doutora/Doutor	Bioquímica	5	Não	Assisti uma parte da programação ao vivo e parte posteriormente pelos links do YouTube	5		Sim	5		Não	3	5	Acesso aos e-mails com notícias do I WOB20	Fundamental, manter em futuros eventos	Fundamental, manter em futuros eventos	Não	Não participei :(	3
2021/01/05 7:32:10 PM GMT-3	Ciências biológicas	Doutoranda (o)	Mestre em Ciências - microbiologia agrícola	5	Sim	Assisti uma parte da programação ao vivo e parte posteriormente pelos links do YouTube	5		Sim	5		Não	3	5	Problemas com a conexão de internet	Fundamental, manter em futuros eventos	Fundamental, manter em futuros eventos	Não	Não participei :(	1
2021/01/05 9:02:53 PM GMT-3	Ciências biológicas	Estudante de graduação	Ensino médio	5	Sim	Assisti uma parte da programação ao vivo e parte posteriormente pelos links do YouTube	5		Sim	5		Não	5	5	Problemas com a conexão de internet	Fundamental, manter em futuros eventos	Fundamental, manter em futuros eventos	Não	Não participei :(	5
2021/01/06 11:13:20 AM GMT-3	Ciências biológicas	Doutoranda (o)	Neurociências	5	Sim	Assisti uma parte da programação ao vivo e parte posteriormente pelos links do YouTube	5		Não	5		Sim	5	5	Problemas com a conexão de internet	Fundamental, manter em futuros eventos	Fundamental, manter em futuros eventos	Sim	#TeamJacaré	5
2021/01/06 11:58:29 AM GMT-3	Ciências biológicas	Estudante de graduação	Ciências Biológicas	4	Sim	Assisti a programação completa ao vivo	4	Comunicação ruim	Sim	4		Sim	3	3	Dificuldade de me concentrar durante o evento;Acesso aos e-mails com notícias do I WOB20	Fundamental, manter em futuros eventos	Fundamental, manter em futuros eventos	Sim	#TeamCobra	3			comunicação fora do evento muito dificil
2021/01/06 1:50:37 PM GMT-3	Engenharia da computação	Estudante de graduação	-	5	Sim	Assisti a programação completa ao vivo	5		Sim	4		Sim	5	5	N	Fundamental, manter em futuros eventos	Fundamental, manter em futuros eventos	Não	Não participei :(	3
2021/01/06 2:08:11 PM GMT-3	Ciências biológicas	Mestranda (o)	Biologia	5	Sim	Assisti uma parte da programação ao vivo e parte posteriormente pelos links do YouTube	5		Não	4		Não	2	5	Dificuldade de me concentrar durante o evento;Acesso aos e-mails com notícias do I WOB20	Fundamental, manter em futuros eventos	Fundamental, manter em futuros eventos	Sim	#TeamCobra	5
2021/01/06 2:10:17 PM GMT-3	Ciências biológicas	Mestranda (o)	Biologia	5	Sim	Assisti uma parte da programação ao vivo e parte posteriormente pelos links do YouTube	5		Sim	5		Sim	5	5	Dificuldade de me concentrar durante o evento	Fundamental, manter em futuros eventos	Fundamental, manter em futuros eventos	Sim	#TeamCobra	5
2021/01/06 4:03:34 PM GMT-3	Agronomia	Doutoranda (o)	Mestrado em Ecologia	5	Sim	Assisti uma parte da programação ao vivo e parte posteriormente pelos links do YouTube	5		Não	4		Sim	5	5	Problemas com a conexão de internet;Preenchimento das listas de presença;Acesso aos e-mails com notícias do I WOB20	Fundamental, manter em futuros eventos	Fundamental, manter em futuros eventos	Não	Não participei :(	4
2021/01/06 5:33:51 PM GMT-3	Interdisciplinar	Estudante de graduação	Bacharelado Interdisciplinar em Ciência e Tecnologia do Mar	5	Sim	Assisti uma parte da programação ao vivo e parte posteriormente pelos links do YouTube	5		Sim	5		Não	3	5	Preenchimento das listas de presença;Acesso aos e-mails com notícias do I WOB20	Fundamental, manter em futuros eventos	Fundamental, manter em futuros eventos	Sim	#TeamJaguatirica	5
2021/01/06 6:51:40 PM GMT-3	Ciências biológicas	Estudante de graduação	Licenciatura	4	Sim	Assisti a programação completa ao vivo	4		Sim	4		Sim	5	5	Acesso aos e-mails com notícias do I WOB20	Fundamental, manter em futuros eventos	Fundamental, manter em futuros eventos	Não	Não participei :(	3
2021/01/06 6:54:35 PM GMT-3	Ciências biológicas	Pós-doc concluído	Ciências da Saúde	5	Sim	Assisti a programação completa ao vivo	5		Sim	5		Sim	5	5	Sem problemas	Fundamental, manter em futuros eventos	Fundamental, manter em futuros eventos	Sim	#TeamJacaré	5
2021/01/06 8:00:23 PM GMT-3	Ciências biológicas	Estudante de graduação	Ciências Biológicas	5	Sim	Assisti uma parte da programação ao vivo e parte posteriormente pelos links do YouTube	5		Sim	5		Não	5	5	-	Fundamental, manter em futuros eventos	Fundamental, manter em futuros eventos	Sim	#TeamCobra	2
2021/01/06 8:52:56 PM GMT-3	Ciências da Saúde	Graduada/Graduado	BIOMEDICINA	5	Sim	Assisti a programação completa ao vivo	5		Sim	5		Sim	5	5	Não encontrei dificuldades	Fundamental, manter em futuros eventos	Fundamental, manter em futuros eventos	Não	Não participei :(	5
2021/01/07 12:35:44 AM GMT-3	Ciências biológicas	Estudante de graduação	bacharel	4	Sim	Assisti a programação completa ao vivo	5		Não	5		Sim	4	4	Dificuldade de me concentrar durante o evento	Fundamental, manter em futuros eventos	Fundamental, manter em futuros eventos	Não	#TeamJaguatirica	4
2021/01/07 9:32:51 AM GMT-3	Ciências da Saúde	Graduada/Graduado	Biotecnologia	5	Sim	Assisti a programação completa ao vivo	5	Excelente programação!	Sim	5		Sim	5	5	Problemas com a conexão de internet	Fundamental, manter em futuros eventos	Fundamental, manter em futuros eventos	Não	Não participei :(	4		Organização e todo o esclarecimento pela comissão foi de suma importância para o desenvolvimento este Workshop. Desta forma, quero parabenizar a todos envolvidos na organização e os palestrantes.		Obrigada pelo I Workshop Online de Bioinformática.
2021/01/07 7:01:24 PM GMT-3	Ciências biológicas	Estudante de graduação	Ciencias Naturais - Biologia	5	Sim	Assisti uma parte da programação ao vivo e parte posteriormente pelos links do YouTube	5		Sim	5		Sim	5	5	Problemas com a conexão de internet;Preenchimento das listas de presença	Fundamental, manter em futuros eventos	Fundamental, manter em futuros eventos	Não	Não participei :(	5
2021/01/08 11:16:14 AM GMT-3	Farmácia	Estudante de graduação	Farmácia	5	Sim	Assisti a programação completa ao vivo	5		Sim	5		Sim	5	5	Nenhuma	Fundamental, manter em futuros eventos	Fundamental, manter em futuros eventos	Sim	#TeamCapivara	5
2021/01/08 1:16:30 PM GMT-3	Ciências biológicas	Estudante de graduação	licenciatura	4	Sim	Assisti uma parte da programação ao vivo e parte posteriormente pelos links do YouTube	4		Não	4		Não	4	3	Dificuldade de me concentrar durante o evento;Acesso aos e-mails com notícias do I WOB20	Fundamental, manter em futuros eventos	Fundamental, manter em futuros eventos	Não	Não participei :(	3		Parabéns pela organização do curso, foi uma das coisas que mais me impressionou, a facilidade de vcs em lidar com a tecnologia, por exemplo com a caixa de perguntas que passava na tela para todos nós assistirmos! Simplesmente incrível, rico em conhecimento !!	Mais palestrantes, mais conhecimento melhor kkkk
2021/01/08 3:56:41 PM GMT-3	Ciências biológicas	Estudante de graduação	Graduação	5	Sim	Assisti uma parte da programação ao vivo e parte posteriormente pelos links do YouTube	5		Sim	5		Não	1	5	Dificuldade de me concentrar durante o evento	Fundamental, manter em futuros eventos	Fundamental, manter em futuros eventos	Não	Não participei :(	3
2021/01/08 10:16:59 PM GMT-3	Ciências biológicas	Doutoranda (o)	Botânica Aplicada	5	Sim	Assisti a programação completa ao vivo	5		Sim	5		Sim	5	5	Dificuldade em acessar os links do YouTube;Preenchimento das listas de presença	Fundamental, manter em futuros eventos	Fundamental, manter em futuros eventos	Não	Não participei :(	5
2021/01/09 2:50:17 PM GMT-3	Biomedicina	Estudante de graduação	Não tenho outra formação além desta em andamento!	5	Sim	Assisti a programação completa ao vivo	5	Gostei de tudo, principalmente dos depoimentos/histórias dos profissionais de carreira não acadêmica, sobre o mercado de trabalho.	Sim	5	Ter mais depoimentos, exemplos de profissionais desta área dentro e fora do País.	Sim	5	5	Dificuldade em acessar os links do YouTube	Fundamental, manter em futuros eventos	Fundamental, manter em futuros eventos	Sim	#TeamJaguatirica	5	Foi interessante e divertido!	Amei a pontualidade e organização bem estruturada e concisa das palestras.	Facilidade de sair de uma palestra p/ outra sem ter de mudar de página no YT.	Que a ordem e o progresso estejam sempre presentes em cada nova edição deste evento, assim como ocorreu c/ este!
2021/01/09 9:16:03 PM GMT-3	Ciências biológicas	Mestranda (o)	Ciências Biológicas	5	Sim	Assisti a programação completa ao vivo	5		Sim	5		Não	1	5	Problemas com a conexão de internet	Fundamental, manter em futuros eventos	Fundamental, manter em futuros eventos	Sim	#TeamJaguatirica	5
2021/01/10 5:17:25 PM GMT-3	Ciências biológicas	Estudante de graduação	Ensino médio	5	Não	Assisti uma parte da programação ao vivo e parte posteriormente pelos links do YouTube	5	Amei a taça das casas	Não	4	Achei que começaram muito tarde	Sim	5	5	Problemas com a conexão de internet;Dificuldade de me concentrar durante o evento;Acesso aos e-mails com notícias do I WOB20	Fundamental, manter em futuros eventos	Fundamental, manter em futuros eventos	Sim	#TeamJaguatirica	5	Foi incrível
2021/01/10 6:03:06 PM GMT-3	Ciências biológicas	Estudante de graduação	Biotecnologia	5	Não	Assisti uma parte da programação ao vivo e parte posteriormente pelos links do YouTube	5		Sim	5		Não	2	5	Problemas com a conexão de internet;Dificuldade de me concentrar durante o evento	Fundamental, manter em futuros eventos	Fundamental, manter em futuros eventos	Não	Não participei :(	5		Foi incrível! Vai me ajudar muito a minha formação
2021/01/10 6:29:59 PM GMT-3	Ciências biológicas	Graduada/Graduado	Graduação	5	Sim	Assisti a programação completa ao vivo	5	Sem comentários.	Sim	5	Sem comentários.	Não	2	5	Acesso aos e-mails com notícias do I WOB20	Fundamental, manter em futuros eventos	Fundamental, manter em futuros eventos	Sim	#TeamCobra	5	Sem comentários.	Parabéns pela a organização.	Sorteios de mais cursos.	Parabéns pela a organização.
2021/01/10 8:00:40 PM GMT-3	Interdisciplinar	Mestra/Mestre	Pós Graduação em Bioinformática pela UFMG.	5	Sim	Assisti uma parte da programação ao vivo e parte posteriormente pelos links do YouTube	5		Sim	5		Não	1	5	Problemas com a conexão de internet;Dificuldade de me concentrar durante o evento	Fundamental, manter em futuros eventos	Fundamental, manter em futuros eventos	Sim	#TeamJaguatirica	5		A programação estava muito boa, participei achando que não ia me interessar por algumas palestras, mas todos os palestrantes apresentaram muito bem.	Não percebi problemas no workshop. Acho que a extensão das apresentações poderia ser um problema, se as lives não ficassem gravadas. Mas como ficaram, não tive problemas.	O evento me surpreendeu, foi mais do que eu esperava. Espero que continuem assim.
2021/01/11 8:52:50 AM GMT-3	Ciências biológicas	Mestranda (o)	graduação em ciências biológicas	5	Não	Assisti a programação completa ao vivo	5		Não	5		Sim	4	5	Dificuldade de me concentrar durante o evento	Fundamental, manter em futuros eventos	Fundamental, manter em futuros eventos	Não	Não participei :(	4				Este evento foi importante para refletir sobre o futuro da minha carreira .
2021/01/11 11:25:50 AM GMT-3	Ciências biológicas	Estudante de graduação	Bacharelado em ciencias biologicas	5	Sim	Assisti a programação completa ao vivo	4		Sim	5		Não	4	4	Problemas com a conexão de internet;Dificuldade de me concentrar durante o evento	Fundamental, manter em futuros eventos	Fundamental, manter em futuros eventos	Sim	#TeamCobra	5
2021/01/11 4:16:37 PM GMT-3	Interdisciplinar	Mestranda (o)	Biomedicina	4	Sim	Assisti uma parte da programação ao vivo e parte posteriormente pelos links do YouTube	4		Sim	3		Não	3	5	Dificuldade de me concentrar durante o evento	Fundamental, manter em futuros eventos	Fundamental, manter em futuros eventos	Não	Não participei :(	3
2021/01/12 8:53:44 AM GMT-3	Ciências biológicas	Doutoranda (o)	Ciências da Saúde	4	Sim	Assisti a programação completa ao vivo	5	Está ótimo, com uma programação de muito bom gosto.	Sim	5	Foram muito agregadoras.	Sim	5	5	Dificuldade em acessar os links do YouTube	Fundamental, manter em futuros eventos	Fundamental, manter em futuros eventos	Não	Não participei :(	4		É um curso fundamental para a formação de profissionais da área de bioinformática. O conteúdo demonstrado foi excelente.
2021/01/12 10:01:08 AM GMT-3	Ciências biológicas	Doutoranda (o)	Mestrado em Genética e Biologia Molecular	5	Sim	Assisti a programação completa ao vivo	5		Sim	5		Sim	5	5	Problemas com a conexão de internet	Fundamental, manter em futuros eventos	Fundamental, manter em futuros eventos	Não	Não participei :(	5
2021/01/12 11:02:49 AM GMT-3	Ciências biológicas	Graduada/Graduado	biomedicina	5	Não	Assisti a programação completa pelas gravações no YouTube	5	Estava tudo perfeito	Não	5		Sim	5	5	Problemas com a conexão de internet;Preenchimento das listas de presença	Fundamental, manter em futuros eventos	Fundamental, manter em futuros eventos	Não	Não participei :(	5		Amei as palestras e aprendi bastante	Se puder, por mais mesas redondas pq elas foram Extremamente úteis	O melhor evento que já participei, espero que tenha este ano novamente 🥰🥰🥰
2021/01/12 11:05:25 AM GMT-3	Ciências biológicas	Estudante de graduação	biomedicina	5	Sim	Assisti uma parte da programação ao vivo e parte posteriormente pelos links do YouTube	5		Sim	5		Sim	5	5	Problemas com a conexão de internet;Dificuldade em acessar os links do YouTube	Fundamental, manter em futuros eventos	Fundamental, manter em futuros eventos	Não	Não participei :(	5
2021/01/12 12:41:17 PM GMT-3	Farmácia-bioquímica	Graduada/Graduado	Farmácia-bioquímica	5	Sim	Assisti uma parte da programação ao vivo e parte posteriormente pelos links do YouTube	5	Todos os temas abordados, os palestrantes convidados e a forma como toda organização operou no pré-evento e durante o mesmo foram sensacionais! Todos estão de parabéns e os maiores ganhadores somos nós, participantes que tiveram acesso a todo esse conteúdo de qualidade e, por ser online, pudemos assistir de todo o Brasil. Essa flexibilização virtual foi importantíssima para dar acesso a muitas pe…	Sim	5		Não	5	5	Nenhuma dificuldade	Fundamental, manter em futuros eventos	Fundamental, manter em futuros eventos	Sim	#TeamCapivara	5	Foi sensacional! Amei a Taça das Casas, e achei genial a sacada que além de remeter a Harry Potter e conseguir agradar e atingir um grande público que é fã, ajudou a integrar os participantes e estimulou raciocínio e aprendizado ao respondermos as questões para participar. Na minha opinião, a 2ª Taça das Casas PRECISA ACONTECER! #TeamCapivara4ever♥	Já fiz os elogios no primeiro comentário, mas reitero todos, agradecendo imensamente aos profissionais presentes, às palestras incríveis e à toda comissão de organização que foi padrão ouro e deu exemplo de como gerir um evento de altíssima qualidade.
2021/01/12 3:00:37 PM GMT-3	Ciências biológicas	Doutoranda (o)	Mestre Ciência Animal	5	Sim	Assisti a programação completa ao vivo	4		Sim	4		Sim	4	4	Acesso aos e-mails com notícias do I WOB20	Fundamental, manter em futuros eventos	Fundamental, manter em futuros eventos	Não	Não participei :(	3		Sugiro no próximo falar de peixe também	que tenha minicursos práticos de alinhamento	Aprendi muito
2021/01/12 3:03:23 PM GMT-3	Ciências biológicas	Doutoranda (o)	Mestre Ciência Animal	5	Sim	Assisti a programação completa ao vivo	4		Sim	4		Sim	4	4	Acesso aos e-mails com notícias do I WOB20	Fundamental, manter em futuros eventos	Fundamental, manter em futuros eventos	Não	Não participei :(	3		Sugiro no próximo falar de peixe também	que tenha minicursos práticos de alinhamento	Aprendi muito
2021/01/12 10:00:49 PM GMT-3	Ciências biológicas	Graduada/Graduado	Ciências Biológicas	5	Sim	Assisti uma parte da programação ao vivo e parte posteriormente pelos links do YouTube	5		Sim	5		Sim	5	5	Horário	Fundamental, manter em futuros eventos	Fundamental, manter em futuros eventos	Não	Não participei :(	3
2021/01/13 9:26:41 AM GMT-3	Ciências exatas não computacionais	Pós-doc em andamento	DOUTORADO EM CIÊNCIAS	5	Sim	Assisti uma parte da programação ao vivo e parte posteriormente pelos links do YouTube	4		Não	4		Sim	4	5	NENHUMA	Fundamental, manter em futuros eventos	Fundamental, manter em futuros eventos	Sim	#TeamCobra	5
2021/01/13 9:38:01 AM GMT-3	Ciências biológicas	Doutora/Doutor	Higiene Veterinária e Processamento de Produtos de Origem Animal	5	Sim	Assisti uma parte da programação ao vivo e parte posteriormente pelos links do YouTube	5		Sim	5		Sim	3	5	Problemas com a conexão de internet;Dificuldade de me concentrar durante o evento	Fundamental, manter em futuros eventos	Foi bom, mas evitar em futuros eventos	Não	Não participei :(	3
2021/01/13 10:09:20 AM GMT-3	Interdisciplinar	Pós-doc em andamento	Engenharia Química	5	Sim	Assisti uma parte da programação ao vivo e parte posteriormente pelos links do YouTube	5		Sim	5		Não	5	5	Preenchimento das listas de presença	Fundamental, manter em futuros eventos	Fundamental, manter em futuros eventos	Não	Não participei :(	5
2021/01/14 8:48:17 AM GMT-3	Interdisciplinar	Mestranda (o)	Bacharel em Sistemas de Informação	5	Não	Assisti uma parte da programação ao vivo e parte posteriormente pelos links do YouTube	5		Não	5		Não	3	5	Confusão nas transmissões do YouTube	Fundamental, manter em futuros eventos	Fundamental, manter em futuros eventos	Não	Não participei :(	5
2021/01/14 1:53:18 PM GMT-3	Ciências biológicas	Mestranda (o)	Ciências Biológicas	5	Não	Assisti uma parte da programação ao vivo e parte posteriormente pelos links do YouTube	5		Não	4		Não	3	5	Problemas com a conexão de internet;Dificuldade de me concentrar durante o evento	Fundamental, manter em futuros eventos	Fundamental, manter em futuros eventos	Não	Não participei :(	3
2021/01/14 3:10:35 PM GMT-3	Biotecnologia	Pós-doc em andamento	Oncologia	5	Sim	Assisti uma parte da programação ao vivo e parte posteriormente pelos links do YouTube	5		Não	5		Sim	5	5	Acesso aos e-mails com notícias do I WOB20	Fundamental, manter em futuros eventos	Fundamental, manter em futuros eventos	Não	Não participei :(	4
2021/01/14 3:15:19 PM GMT-3	Ciências biológicas	Estudante de graduação	Ciências Biológicas - habilitação em Biotecnologia	5	Sim	Assisti uma parte da programação ao vivo e parte posteriormente pelos links do YouTube	5		Não	5		Não	1	5	Nenhuma	Fundamental, manter em futuros eventos	Fundamental, manter em futuros eventos	Não	Não participei :(	5
2021/01/14 5:00:09 PM GMT-3	Biotecnologia	Mestranda (o)	Bacharelado em Biotecnologia	5	Sim	Assisti uma parte da programação ao vivo e parte posteriormente pelos links do YouTube	5		Sim	5		Não	3	5	Nenhuma	Fundamental, manter em futuros eventos	Fundamental, manter em futuros eventos	Sim	#TeamCobra	4
2021/01/15 4:54:58 PM GMT-3	Ciências biológicas	Graduada/Graduado	Licenciada em Ciências Biológicas	5	Sim	Assisti uma parte da programação ao vivo e parte posteriormente pelos links do YouTube	5		Não	5		Sim	5	5	Problemas com a conexão de internet	Fundamental, manter em futuros eventos	Fundamental, manter em futuros eventos	Não	Não participei :(	5				O curso de vocês é muito conhecido, várias pessoas já haviam me indicado, e permitir o evento online foi importantíssimo, talvez se não fosse dessa forma eu não teria como acessar, então muito obrigada.
2021/01/15 7:08:18 PM GMT-3	Ciências biológicas	Estudante de graduação	Biomedicina	5	Sim	Assisti uma parte da programação ao vivo e parte posteriormente pelos links do YouTube	5		Sim	5		Sim	5	5	Problemas com a conexão de internet	Fundamental, manter em futuros eventos	Fundamental, manter em futuros eventos	Não	Não participei :(	5
2021/01/17 8:43:06 AM GMT-3	Ciências biológicas	Doutoranda (o)	Mestrado em Agronomia	5	Sim	Assisti uma parte da programação ao vivo e parte posteriormente pelos links do YouTube	5		Sim	5		Sim	5	5	Problemas com a conexão de internet	Fundamental, manter em futuros eventos	Fundamental, manter em futuros eventos	Não	Não participei :(	4
2021/01/17 10:35:42 PM GMT-3	Ciências biológicas	Estudante de graduação	Farmácia	5	Sim	Assisti a programação completa ao vivo	4		Sim	5		Sim	5	5	Dificuldade de me concentrar durante o evento	Fundamental, manter em futuros eventos	Fundamental, manter em futuros eventos	Sim	#TeamJaguatirica	5		O evento foi ótimo! Não conhecia e agora pretendo participar de eventos futuros.
2021/01/18 9:20:44 AM GMT-3	Ciências biológicas	Estudante de graduação	Biotecnologia	4	Sim	Assisti uma parte da programação ao vivo e parte posteriormente pelos links do YouTube	4		Sim	3		Não	1	4	Dificuldade de me concentrar durante o evento;Acesso aos e-mails com notícias do I WOB20	Fundamental, manter em futuros eventos	Fundamental, manter em futuros eventos	Não	Não participei :(	2
2021/01/18 5:01:59 PM GMT-3	Ciências biológicas	Mestranda (o)	Biomedicina	5	Sim	Assisti uma parte da programação ao vivo e parte posteriormente pelos links do YouTube	5		Sim	5		Não	2	5	Preenchimento das listas de presença	Fundamental, manter em futuros eventos	Fundamental, manter em futuros eventos	Não	Não participei :(	3
2021/01/18 5:51:43 PM GMT-3	Ciências biológicas	Mestranda (o)	Biomedicina	5	Não	Não assisti à programação completa, apenas assisti o que pude ver ao vivo	5		Não	5		Não	4	5	Problemas com a conexão de internet	Fundamental, manter em futuros eventos	Fundamental, manter em futuros eventos	Sim	#TeamJaguatirica	5		O evento foi lindo e a competição das taças foi ótima! Criou uma interação muito legal! Estão de parabéns!
2021/01/18 6:05:10 PM GMT-3	Ciências biológicas	Doutoranda (o)	Pesquisas laboratoriais em saúde pública	5	Sim	Assisti a programação completa ao vivo	5		Sim	5		Sim	3	5	Não houve	Fundamental, manter em futuros eventos	Fundamental, manter em futuros eventos	Não	Não participei :(	3
2021/01/18 10:27:23 PM GMT-3	Ciências biológicas	Estudante de graduação	Biologia marinha	4	Sim	Assisti a programação completa ao vivo	4		Sim	4		Não	4	4	Problemas com a conexão de internet	Fundamental, manter em futuros eventos	Fundamental, manter em futuros eventos	Não	Não participei :(	1		Parabéns a toda a equipe organizadora!	Mantenham o padrão	Só presenciei pessoas comprometidas ao evento
2021/01/19 1:57:35 AM GMT-3	Ciências biológicas	Estudante de graduação	Ciências biológicas	4	Sim	Assisti a programação completa ao vivo	4		Sim	4		Sim	4	4	Problemas com a conexão de internet	Fundamental, manter em futuros eventos	Fundamental, manter em futuros eventos	Não	Não participei :(	1
2021/01/19 10:42:21 AM GMT-3	Interdisciplinar	Estudante de graduação	Tecnologia em Informática em Saúde	5	Sim	Não assisti à programação completa, apenas assisti o que pude ver ao vivo	5		Não	5		Não	1	4	Dificuldade de me concentrar durante o evento	Fundamental, manter em futuros eventos	Fundamental, manter em futuros eventos	Sim	#TeamCapivara	4
2021/01/20 11:40:24 AM GMT-3	Interdisciplinar	Graduada/Graduado	Análise e desenvolvimento de sistemas	5	Sim	Assisti a programação completa ao vivo	5		Sim	5		Sim	5	5	Dificuldade de me concentrar durante o evento	Fundamental, manter em futuros eventos	Fundamental, manter em futuros eventos	Sim	#TeamJaguatirica	5		Foi sensacional.
2021/01/20 11:47:46 AM GMT-3	Ciências biológicas	Mestra/Mestre	CIÊNCIAS (MICROBIOLOGIA E IMUNOLOGIA)	5	Não	Assisti uma parte da programação ao vivo e parte posteriormente pelos links do YouTube	5	Seria interessante os palestrantes compararem as próprias palestras, para evitar repetições excessivas e desnecessárias de conteúdos já abordados em palestras anteriores.	Não	4		Sim	5	5	Problemas com a conexão de internet	Fundamental, manter em futuros eventos	Fundamental, manter em futuros eventos	Não	Não participei :(	3		Amei a programação e a equipe organizadora. É por isso que a bioinformática da UFMG é a melhor do país.	Se continuar no formato online, seria interessante uma expansão do evento abordando mais temas ou detalhando alguns. Adicionalmente, reitero a importância de compararem apresentações entre os palestrantes de forma a evitar repetições em excesso.	Pretendo ingressar na área de bioinformática e as palestras do WOB foram um estímulo extra. Muito obrigado pelo tempo e dedicação de vocês.
2021/01/20 3:32:06 PM GMT-3	Engenharia Química	Estudante de graduação	2016	4	Sim	Assisti uma parte da programação ao vivo e parte posteriormente pelos links do YouTube	4		Não	3		Sim	4	4	Problemas com a conexão de internet	Fundamental, manter em futuros eventos	Fundamental, manter em futuros eventos	Não	Não participei :(	3
2021/01/20 3:32:24 PM GMT-3	Engenharia Química	Estudante de graduação	2016	4	Sim	Assisti uma parte da programação ao vivo e parte posteriormente pelos links do YouTube	4		Não	3		Sim	4	4	Problemas com a conexão de internet	Fundamental, manter em futuros eventos	Fundamental, manter em futuros eventos	Não	Não participei :(	3
2021/01/20 9:32:34 PM GMT-3	Ciências biológicas	Mestranda (o)	Licenciatura em Ciências Biológicas	5	Sim	Assisti uma parte da programação ao vivo e parte posteriormente pelos links do YouTube	5		Sim	5		Sim	5	5	Problemas com a conexão de internet	Fundamental, manter em futuros eventos	Fundamental, manter em futuros eventos	Sim	#TeamJaguatirica	5	Estou fazendo o curso e está sendo ótimo!	Parabéns a todos envolvidos! Que venham mais edições.		Espero que continuem disponibilizando o evento na modalidade online, mesmo depois da pandemia.
2021/01/21 2:08:53 PM GMT-3	Ciências biológicas	Mestranda (o)	Ciências biológicas	5	Sim	Assisti a programação completa ao vivo	5		Sim	5		Sim	5	5	Problemas com a conexão de internet	Fundamental, manter em futuros eventos	Fundamental, manter em futuros eventos	Não	Não participei :(	1
2021/01/22 9:11:35 PM GMT-3	Ciências biológicas	Mestranda (o)	Ciências Biológicas	4	Sim	Assisti uma parte da programação ao vivo e parte posteriormente pelos links do YouTube	5		Não	5		Não	3	5	Problemas com a conexão de internet;Dificuldade de me concentrar durante o evento	Fundamental, manter em futuros eventos	Fundamental, manter em futuros eventos	Não	Não participei :(	5				Eu acabei de chegar na Bioinformática, literalmente. Peguei um trem andando bastante rápido e tenho sentido o peso disso dia após dia desde o início de minha pós-graduação. Não está nem um pouco fácil. Venho de uma área completamente diferente (Zoologia) e o baque foi ainda maior, uma vez que, durante minha graduação, mesmo em todos os laboratórios que passei e os(as) grandes pesquisadores(as) co…
2021/01/25 2:43:45 PM GMT-3	Ciências biológicas	Doutoranda (o)	Mestrado em Microbiologia (UFMG)	5	Sim	Assisti a programação completa ao vivo	5		Sim	5		Sim	5	5	Nenhuma dificuldade	Fundamental, manter em futuros eventos	Fundamental, manter em futuros eventos	Não	Não participei :(	3
2021/01/25 4:09:16 PM GMT-3	Engenheiro Agrônomo	Doutora/Doutor	Doutorado em Microbiologia Agropecuária	5	Sim	Assisti a programação completa ao vivo	5	Desejo que todo ano, mesmo após o fim da pandemia seja oferecido esse evento on-line. Essa modalidade de evento facilita muito a possibilidade de participação, pois acaba com os custos de deslocamento.	Não	4		Sim	4	5	Problemas com a conexão de internet	Fundamental, manter em futuros eventos	Fundamental, manter em futuros eventos	Sim	#TeamCapivara	5		Gostaria muito que esse formato de evento se repetisse nos outros anos, mesmo após o fim da pandemia.	Achei um pouco complicado fazer inscrição pra taça das casas.	Meus sinceros parabéns! Esse tipo de evento, nesse formato, é um estímulo para que mais pessoas façam pós-graduação em Bioinformática.
2021/01/25 4:29:16 PM GMT-3	Ciências biológicas	Mestranda (o)	Ciências Biológicas: Microbiologia e Imunologia	5	Sim	Assisti uma parte da programação ao vivo e parte posteriormente pelos links do YouTube	5		Sim	5		Não	3	5	Problemas com a conexão de internet	Fundamental, manter em futuros eventos	Fundamental, manter em futuros eventos	Não	Não participei :(	3
2021/01/25 6:25:32 PM GMT-3	Ciências biológicas	Estudante de graduação	CIÊNCIAS BIOLÓGICAS LICENCIATURA UFES CAMPUS DE ALEGRE	4	Não	Assisti uma parte da programação ao vivo e parte posteriormente pelos links do YouTube	5	Não foi muito brm frito amo os qrs codes de interação que vocês utilizam.	Sim	5	Nenhuma	Não	2	5	Choque dd horário com alguma aula durante o ensino remoto da Universidade	Fundamental, manter em futuros eventos	Fundamental, manter em futuros eventos	Sim	Não participei :(	5	Nenhuma	Gostei muito do tempo, dos jogo e do inteprete em libras.	Fazer os proximos ou em feriados iu em finais de semanas seria interessante.	Hahaha gostei imensidade do worshop, vocês estão de parabéns!!!
2021/01/25 9:45:47 PM GMT-3	Interdisciplinar	Estudante de graduação	Biotecnologia	5	Não	Assisti uma parte da programação ao vivo e parte posteriormente pelos links do YouTube	5		Sim	5		Não	2	5	Problemas com a conexão de internet	Fundamental, manter em futuros eventos	Fundamental, manter em futuros eventos	Não	Não participei :(	4
2021/01/26 1:08:49 AM GMT-3	Ciências biológicas	Doutoranda (o)	Mestrado em Genética e Biologia Molecular	4	Sim	Assisti uma parte da programação ao vivo e parte posteriormente pelos links do YouTube	4		Sim	4		Sim	5	5	Dificuldade de me concentrar durante o evento	Fundamental, manter em futuros eventos	Fundamental, manter em futuros eventos	Não	#TeamJacaré	3	Tive dificuldade com os links de reunião e acabei desistindo de participar
2021/01/26 8:15:39 AM GMT-3	Ciências biológicas	Mestranda (o)	Ciências Biológicas	5	Não	Assisti uma parte da programação ao vivo e parte posteriormente pelos links do YouTube	5		Sim	5		Sim	5	5	Acesso aos e-mails com notícias do I WOB20	Fundamental, manter em futuros eventos	Fundamental, manter em futuros eventos	Não	Não participei :(	3
2021/01/26 1:34:49 PM GMT-3	Ciências biológicas	Estudante de graduação	ensino medio	5	Sim	Assisti a programação completa ao vivo	5		Sim	5		Sim	5	5	Preenchimento das listas de presença	Fundamental, manter em futuros eventos	Fundamental, manter em futuros eventos	Não	Não participei :(	5
2021/01/26 1:39:25 PM GMT-3	Ciências biológicas	Mestra/Mestre	Pós-graduação em Biotecnologia	5	Sim	Assisti uma parte da programação ao vivo e parte posteriormente pelos links do YouTube	5		Sim	5		Sim	5	5	Preenchimento das listas de presença	Fundamental, manter em futuros eventos	Fundamental, manter em futuros eventos	Não	Não participei :(	2
2021/01/26 7:05:16 PM GMT-3	Ciências biológicas	Estudante de graduação	Ciências Biológicas	5	Sim	Assisti a programação completa ao vivo	5		Sim	5		Sim	5	5	Acesso aos e-mails com notícias do I WOB20	Fundamental, manter em futuros eventos	Fundamental, manter em futuros eventos	Não	Não participei :(	3
2021/01/26 8:03:57 PM GMT-3	Engenharia de bioprocessos e biotecnologia	Graduada/Graduado	Técnico de biotecnologia	5	Não	Assisti uma parte da programação ao vivo e parte posteriormente pelos links do YouTube	5		Sim	5		Sim	5	5	Problemas com a conexão de internet	Fundamental, manter em futuros eventos	Fundamental, manter em futuros eventos	Não	Não participei :(	3
2021/01/27 10:13:09 AM GMT-3	Ciências biológicas	Doutoranda (o)	Biologia Celular e Estrutural	5	Sim	Assisti a programação completa ao vivo	5	O workshop online poderia acontecer todos os anos para que mais pessoas tenham acesso.	Sim	4		Não	3	5	Acesso aos e-mails com notícias do I WOB20	Fundamental, manter em futuros eventos	Fundamental, manter em futuros eventos	Sim	#TeamCapivara	5		Foi excelente! Gostaria de mais eventos como esse.	Sorteio ou até mesmo divulgação de mais cursos online.	Vocês foram excelentes em tudo! Muito obrigada pela oportunidade, que eu não teria se não fosse online!
2021/01/28 1:01:59 PM GMT-3	Ciências exatas não computacionais	Estudante de graduação	engenharia agrícola e ambiental	5	Sim	Assisti uma parte da programação ao vivo e parte posteriormente pelos links do YouTube	5	nenhuma	Sim	5	nenhuma	Sim	5	5	nenhuma	Fundamental, manter em futuros eventos	Fundamental, manter em futuros eventos	Não	Não participei :(	5	nenhuma	ótimo curso	nenhuma	gratidão
2021/01/28 4:23:43 PM GMT-3	Ciências biológicas	Mestra/Mestre	Biociências	5	Sim	Assisti uma parte da programação ao vivo e parte posteriormente pelos links do YouTube	5		Sim	5		Não	2	5	Problemas com a conexão de internet	Fundamental, manter em futuros eventos	Fundamental, manter em futuros eventos	Sim	#TeamJaguatirica	5	Amei	Muito Bom! Gratidão!
2021/01/28 4:26:36 PM GMT-3	Ciências biológicas	Mestra/Mestre	Biociências	5	Sim	Assisti uma parte da programação ao vivo e parte posteriormente pelos links do YouTube	5		Sim	5		Não	2	5	Problemas com a conexão de internet	Fundamental, manter em futuros eventos	Fundamental, manter em futuros eventos	Sim	#TeamJaguatirica	5
2021/01/29 12:32:35 AM GMT-3	Ciências biológicas	Doutora/Doutor	Biologia de sistemas	5	Sim	Assisti uma parte da programação ao vivo e parte posteriormente pelos links do YouTube	5		Sim	5		Sim	5	5	Problemas com a conexão de internet	Fundamental, manter em futuros eventos	Fundamental, manter em futuros eventos	Não	Não participei :(	4
2021/01/29 10:37:47 AM GMT-3	Medicina Veterinária	Doutoranda (o)	Mestre em Ciência Animal nos Trópicos	5	Sim	Assisti a programação completa ao vivo	5		Sim	5		Não	3	5	Não tive	Fundamental, manter em futuros eventos	Fundamental, manter em futuros eventos	Sim	#TeamCobra	5
2021/01/29 7:50:58 PM GMT-3	Ciências biológicas	Estudante de graduação	Ciências Biológicas	5	Sim	Assisti uma parte da programação ao vivo e parte posteriormente pelos links do YouTube	5		Sim	5		Não	3	5	Preenchimento das listas de presença;Acesso aos e-mails com notícias do I WOB20	Fundamental, manter em futuros eventos	Fundamental, manter em futuros eventos	Não	Não participei :(	5
2021/01/30 2:43:39 PM GMT-3	Ciências biológicas	Graduada/Graduado	Biotecnologia	5	Sim	Assisti a programação completa ao vivo	5	Adorei o sistema de prêmios que ocorreu junto	Sim	5	Não há	Não	3	5	Acesso aos e-mails com notícias do I WOB20	Fundamental, manter em futuros eventos	Fundamental, manter em futuros eventos	Sim	#TeamJaguatirica	5		Obrigado por fazer um evento totalmente online com tanta qualidade
2021/02/01 7:31:47 PM GMT-3	Ciências biológicas	Estudante de graduação	Ciências biológicas, Bacharelado	5	Sim	Assisti uma parte da programação ao vivo e parte posteriormente pelos links do YouTube	5		Não	5		Sim	5	5	Problemas com a conexão de internet;Dificuldade de me concentrar durante o evento	Fundamental, manter em futuros eventos	Fundamental, manter em futuros eventos	Não	Não participei :(	5		Conteúdo foi muito bem selecionado, amplo, palestrantes e organização excelentes.		Ansiosa pelo próximo!
2021/02/01 7:33:05 PM GMT-3	Ciências biológicas	Estudante de graduação	Ciências biológicas, Bacharelado	5	Sim	Assisti uma parte da programação ao vivo e parte posteriormente pelos links do YouTube	5		Não	5		Sim	5	5	Problemas com a conexão de internet;Dificuldade de me concentrar durante o evento	Fundamental, manter em futuros eventos	Fundamental, manter em futuros eventos	Não	Não participei :(	5		Conteúdo foi muito bem selecionado, amplo, palestrantes e organização excelentes.		Ansiosa pelo próximo!
2021/02/03 4:02:39 PM GMT-3	Ciências biológicas	Graduada/Graduado	Ciências Biológicas	4	Sim	Assisti uma parte da programação ao vivo e parte posteriormente pelos links do YouTube	5		Não	5		Sim	4	5	Problemas com a conexão de internet;Dificuldade de me concentrar durante o evento	Fundamental, manter em futuros eventos	Fundamental, manter em futuros eventos	Não	Não participei :(	3
2021/02/03 5:57:06 PM GMT-3	Interdisciplinar	Estudante de graduação	Engenharia de bioprocessos e biotecnologia	4	Sim	Assisti a programação completa ao vivo	5		Sim	5		Sim	5	5	Dificuldade em acessar os links do YouTube;Dificuldade de me concentrar durante o evento	Fundamental, manter em futuros eventos	Fundamental, manter em futuros eventos	Não	Não participei :(	3
2021/02/08 7:58:10 PM GMT-3	Ciências biológicas	Mestranda (o)	Licenciatura em Física	5	Sim	Assisti uma parte da programação ao vivo e parte posteriormente pelos links do YouTube	5	Vocês estão de parabéns pelo evento e pelo feedback, pois tive problemas com a lista de presença e fui prontamente atendida.	Não	5	Não consegui assistir todas, mas as que assisti demonstraram o nível de qualidade do evento.	Sim	5	5	Problemas com a conexão de internet;Preenchimento das listas de presença	Fundamental, manter em futuros eventos	Fundamental, manter em futuros eventos	Sim	#TeamCobra	5	Achei bem interessante, mas como sou novata no curso, errei muitas respostas e não pude ajudar muito, mas para os próximos estarei afiada.	Muito obrigada!!! Vocês brilham muito!!! Que Deus de saúde a todos vocês organizadores e colaboradores para que possamos ter mais eventos desse nível!! Foi muito top!!	O problema de internet foi na minha operadora. Vocês foram perfeitos.	Que Deus abençoe vocês grandemente!!!!
2021/02/12 3:58:35 PM GMT-3	Sistemas de Informação	Graduada/Graduado	Especialização em Redes de Computadores	5	Não	Assisti uma parte da programação ao vivo e parte posteriormente pelos links do YouTube	5		Não	5		Sim	5	5	Conciliar os horários de trabalho como evento.	Fundamental, manter em futuros eventos	Fundamental, manter em futuros eventos	Não	Não participei :(	4		Sou grata por disponibilizar um evento de tão alto nível.		Espero fazer parte nos próximos eventos de forma mais ativa. Obrigada por cada detalhe deste evento.
2021/02/12 10:45:16 PM GMT-3	Ciências biológicas	Doutoranda (o)	Neurociencias	5	Sim	Assisti a programação completa ao vivo	4		Sim	4		Não	3	5	Acesso aos e-mails com notícias do I WOB20	Fundamental, manter em futuros eventos	Fundamental, manter em futuros eventos	Sim	#TeamCobra	4
2021/02/18 12:42:50 AM GMT-3	Ciências biológicas	Estudante de graduação	Ciencias da natureza	4	Sim	Assisti a programação completa ao vivo	4		Sim	3		Sim	3	4	Dificuldade de me concentrar durante o evento;Preenchimento das listas de presença	Fundamental, manter em futuros eventos	Fundamental, manter em futuros eventos	Sim	#TeamCapivara	4
2021/02/18 12:50:28 AM GMT-3	Ciências biológicas	Estudante de graduação	Ciencias da Natureza	3	Sim	Assisti a programação completa ao vivo	3		Sim	3		Sim	3	3	Dificuldade em acessar os links do YouTube;Dificuldade de me concentrar durante o evento	Fundamental, manter em futuros eventos	Fundamental, manter em futuros eventos	Sim	#TeamCapivara	4
2021/02/19 2:44:39 AM GMT-3	Biotecnologia	Graduada/Graduado	Biotecnologia	5	Sim	Assisti a programação completa ao vivo	5	O evento foi incrível	Sim	4	Ótimos assuntos abordados	Sim	5	5	Problemas com a conexão de internet;Dificuldade de me concentrar durante o evento	Fundamental, manter em futuros eventos	Fundamental, manter em futuros eventos	Não	Não participei :(	4
2021/02/19 11:47:10 AM GMT-3	Ciências biológicas	Estudante de graduação	Biotecnologia	5	Sim	Assisti a programação completa pelas gravações no YouTube	5		Não	4		Não	1	5	Acesso aos e-mails com notícias do I WOB20	Fundamental, manter em futuros eventos	Fundamental, manter em futuros eventos	Não	Não participei :(	1
2021/02/21 9:05:33 PM GMT-3	Ciências biológicas	Mestranda (o)	Zootecnia	5	Sim	Assisti uma parte da programação ao vivo e parte posteriormente pelos links do YouTube	5	Poderia ser dividido em mais dias, pois foram muitas horas seguida, em formato online e sem intervalos deixando muito cansativo e diminuindo o rendimento ao longo da tarde.	Sim	5		Não	3	5	Dificuldade de me concentrar durante o evento	Fundamental, manter em futuros eventos	Fundamental, manter em futuros eventos	Não	#TeamJaguatirica	3	Poderia dar mais tempo para responder as questões, dando oportunidade para mais pessoas participarem.	Organização impecável e acessibilidade também! Parabéns!		Foi incrível ser online, isso aumentou o acesso por possibilitar que pessoas de longe participassem.
2021/02/21 10:21:02 PM GMT-3	Ciências da computação	Estudante de graduação	Meio Ambiente	4	Não	Assisti uma parte da programação ao vivo e parte posteriormente pelos links do YouTube	4		Não	4		Sim	5	5	nenhum	Fundamental, manter em futuros eventos	Fundamental, manter em futuros eventos	Não	Não participei :(	3
2021/02/22 12:22:33 PM GMT-3	Ciências biológicas	Doutoranda (o)	Bioquímica e Biologia Molecular	5	Sim	Assisti a programação completa ao vivo	5		Sim	5		Sim	5	5	Nenhuma.	Fundamental, manter em futuros eventos	Fundamental, manter em futuros eventos	Sim	#TeamCobra	5		Evento interativo, temática diversificada, nivelaram bem para atrair novos estudantes para a bioinformática. Parabéns!	Cursos mais avançados.	Parabéns pela iniciativa de apoiar projetos acolhedores que precisam de apoio.
2021/02/22 12:23:49 PM GMT-3	Ciências biológicas	Doutoranda (o)	Bioquímica e Biologia Molecular	5	Sim	Assisti a programação completa ao vivo	5		Sim	5		Sim	5	5	Nenhuma.	Fundamental, manter em futuros eventos	Fundamental, manter em futuros eventos	Sim	#TeamCobra	5		Evento interativo, temática diversificada, nivelaram bem para atrair novos estudantes para a bioinformática. Parabéns!	Cursos mais avançados.	Parabéns pela iniciativa de apoiar projetos acolhedores que precisam de apoio.
2021/02/22 3:16:25 PM GMT-3	Ciências biológicas	Graduada/Graduado	biomedicina	5	Sim	Assisti a programação completa ao vivo	5		Sim	5		Sim	5	5	Dificuldade de me concentrar durante o evento	Fundamental, manter em futuros eventos	Fundamental, manter em futuros eventos	Sim	#TeamCapivara	5
2021/02/22 7:00:44 PM GMT-3	Ciências biológicas	Doutoranda (o)	Mestre	5	Sim	Assisti uma parte da programação ao vivo e parte posteriormente pelos links do YouTube	5		Não	5		Sim	5	5	nenhum	Fundamental, manter em futuros eventos	Fundamental, manter em futuros eventos	Sim	#TeamJaguatirica	5
2021/02/22 7:04:10 PM GMT-3	Ciências biológicas	Doutoranda (o)	Mestre	5	Sim	Assisti uma parte da programação ao vivo e parte posteriormente pelos links do YouTube	5		Sim	5		Sim	5	5	Nenhum	Fundamental, manter em futuros eventos	Fundamental, manter em futuros eventos	Sim	#TeamJaguatirica	5
2021/02/23 12:35:48 PM GMT-3	Ciências biológicas	Doutora/Doutor	Doutorado em Doenças Tropicais	4	Não	Assisti uma parte da programação ao vivo e parte posteriormente pelos links do YouTube	4		Não	4		Não	3	3	Dificuldade de me concentrar durante o evento	Fundamental, manter em futuros eventos	Fundamental, manter em futuros eventos	Não	Não participei :(	3
2021/02/25 8:29:17 PM GMT-3	Biotecnologia	Graduada/Graduado	Biotecnologia	5	Sim	Assisti a programação completa ao vivo	5	Adorei o evento, foi muito informativo	Sim	4	Não	Sim	5	4	Problemas com a conexão de internet;Preenchimento das listas de presença	Fundamental, manter em futuros eventos	Fundamental, manter em futuros eventos	Sim	#TeamCobra	5	Não	Ótimo evento	Minicursos em outras áreas da bioinformatica	Adorei o evento
2021/02/26 10:18:26 AM GMT-3	Ciências biológicas	Mestra/Mestre	Genética e Biologia Molecular	5	Sim	Assisti uma parte da programação ao vivo e parte posteriormente pelos links do YouTube	5		Sim	4		Sim	4	5	Problemas com a conexão de internet	Fundamental, manter em futuros eventos	Fundamental, manter em futuros eventos	Não	Não participei :(	3		Foi um ótimo evento. Que aconteçam mais desses no futuro. Obrigado pela oportunidade.
2021/02/26 2:39:12 PM GMT-3	Interdisciplinar	Estudante de graduação	Engenharia de Bioprocessos	5	Sim	Assisti uma parte da programação ao vivo e parte posteriormente pelos links do YouTube	5		Sim	5		Sim	5	5	Problemas com a conexão de internet	Fundamental, manter em futuros eventos	Fundamental, manter em futuros eventos	Não	Não participei :(	5
2021/03/01 8:45:34 AM GMT-3	Engenharia Florestal	Mestranda (o)	Engenharia Florestal	5	Sim	Assisti a programação completa ao vivo	5		Não	5		Sim	5	5	Problemas com a conexão de internet;Preenchimento das listas de presença	Fundamental, manter em futuros eventos	Fundamental, manter em futuros eventos	Não	Não participei :(	4
2021/03/01 10:08:49 AM GMT-3	Interdisciplinar	Doutora/Doutor	Biossistemas	5	Sim	Assisti uma parte da programação ao vivo e parte posteriormente pelos links do YouTube	5		Sim	5		Não	3	5	Problemas com a conexão de internet	Fundamental, manter em futuros eventos	Fundamental, manter em futuros eventos	Sim	#TeamCapivara	5
2021/03/02 8:06:49 PM GMT-3	Ciências biológicas	Mestra/Mestre	PPG Bioinformática UFMG	5	Não	Assisti a programação completa pelas gravações no YouTube	5		Sim	5		Sim	5	5	Não tive	Fundamental, manter em futuros eventos	Fundamental, manter em futuros eventos	Não	Não participei :(	5
2021/03/03 12:53:41 AM GMT-3	Interdisciplinar	Graduada/Graduado	Farmácia	5	Sim	Assisti a programação completa ao vivo	5		Sim	4		Não	2	4	Acesso aos e-mails com notícias do I WOB20	Fundamental, manter em futuros eventos	Fundamental, manter em futuros eventos	Não	Não participei :(	3		Foi tudo muito bom
2021/03/04 3:56:22 PM GMT-3	Ciências biológicas	Graduada/Graduado	Biotecnologia	5	Sim	Assisti uma parte da programação ao vivo e parte posteriormente pelos links do YouTube	5		Não	4		Não	3	5	Acesso aos e-mails com notícias do I WOB20	Fundamental, manter em futuros eventos	Fundamental, manter em futuros eventos	Não	Não participei :(	3		Muito interessante, espero que vocês realizem mais eventos futuros!	Ver a questão das listas de presença e a certificação de forma mais automatizada, apenas vi essa certificação após o evento
2021/03/04 6:04:15 PM GMT-3	Ciências biológicas	Doutoranda (o)	Mestre em Biotecnologia	5	Sim	Assisti uma parte da programação ao vivo e parte posteriormente pelos links do YouTube	5		Sim	5		Não	3	5	NÃO TIVE DIFICULDADES	Fundamental, manter em futuros eventos	Fundamental, manter em futuros eventos	Não	Não participei :(	3
2021/03/05 1:37:56 AM GMT-3	Biomedicina	Graduada/Graduado	Biomedicina	4	Sim	Assisti a programação completa ao vivo	4		Sim	4		Sim	4	4	Problemas com a conexão de internet	Fundamental, manter em futuros eventos	Fundamental, manter em futuros eventos	Não	Não participei :(	3
2021/03/05 8:41:55 AM GMT-3	Ciências biológicas	Mestra/Mestre	Mestrado em bioquimica e genetica molecular	4	Sim	Assisti a programação completa pelas gravações no YouTube	5		Sim	5		Sim	5	5	Problemas com a conexão de internet	Fundamental, manter em futuros eventos	Fundamental, manter em futuros eventos	Não	Não participei :(	3
2021/03/06 11:27:16 AM GMT-3	Ciências biológicas	Estudante de graduação		5	Sim	Assisti a programação completa ao vivo	5		Sim	5		Sim	5	5	dfdfdf	Fundamental, manter em futuros eventos	Fundamental, manter em futuros eventos	Não	Não participei :(	5
2021/03/07 7:32:09 PM GMT-3	Interdisciplinar	Graduada/Graduado	Bacharel em Biotecnologia	5	Sim	Assisti a programação completa ao vivo	5	quero mais, achei muito legal, muito reativo todo, ate ganhei um curso..	Sim	4		Não	2	5	Dificuldade de me concentrar durante o evento	Fundamental, manter em futuros eventos	Fundamental, manter em futuros eventos	Sim	#TeamJaguatirica	5	amei, ganho meu time
2021/03/11 3:15:03 PM GMT-3	Ciências biológicas	Mestranda (o)	Biomédica	5	Sim	Assisti a programação completa ao vivo	5		Sim	5		Não	3	5	Problemas com a conexão de internet;Dificuldade de me concentrar durante o evento;Preenchimento das listas de presença	Fundamental, manter em futuros eventos	Fundamental, manter em futuros eventos	Não	Não participei :(	3
2021/03/16 4:34:29 PM GMT-3	Ciências biológicas	Doutoranda (o)	Mestre em Saneamento, Meio Ambiente e Recursos Hídricos	5	Sim	Assisti a programação completa ao vivo	5		Sim	4		Sim	4	4	Dificuldade em realizar doações para a campanha beneficente "Projeto X"	Fundamental, manter em futuros eventos	Fundamental, manter em futuros eventos	Não	Não participei :(	4
2021/03/16 4:37:52 PM GMT-3	Ciências biológicas	Doutoranda (o)	Mestre em Saneamento, Meio Ambiente e Recursos Hídricos	5	Sim	Assisti a programação completa ao vivo	5		Sim	5		Sim	5	5	Dificuldade em realizar doações para a campanha beneficente "Projeto X"	Fundamental, manter em futuros eventos	Fundamental, manter em futuros eventos	Não	Não participei :(	5
2021/03/17 11:12:16 AM GMT-3	Ciências biológicas	Estudante de graduação	Ciências Biológicas	5	Sim	Assisti a programação completa ao vivo	5		Sim	5		Não	3	5	nenhuma dificuldade, lembro que todas as palestras foram incríveis, e a vinheta foi perfeita	Fundamental, manter em futuros eventos	Fundamental, manter em futuros eventos	Não	Não participei :(	3		parabéns ao evento, foi magnífico espero que tenham outros		gostaria de mais eventos como esse, a bioinformática é de fato um campo bastante promissor que clama por mais visibilidade e reconhecimento.
2021/03/18 7:39:59 AM GMT-3	Farmácia	Estudante de graduação	Não se aplica	4	Sim	Assisti uma parte da programação ao vivo e parte posteriormente pelos links do YouTube	4		Não	4		Sim	5	5	Dificuldade de me concentrar durante o evento;Preenchimento das listas de presença	Fundamental, manter em futuros eventos	Foi bom, mas evitar em futuros eventos	Não	Não participei :(	3
2021/03/18 7:40:31 AM GMT-3	Farmácia	Estudante de graduação	Não se aplica	4	Sim	Assisti uma parte da programação ao vivo e parte posteriormente pelos links do YouTube	4		Não	4		Sim	5	5	Dificuldade de me concentrar durante o evento;Preenchimento das listas de presença	Fundamental, manter em futuros eventos	Foi bom, mas evitar em futuros eventos	Não	Não participei :(	3
2021/03/18 7:42:09 AM GMT-3	Farmácia	Estudante de graduação	Não se aplica	4	Sim	Assisti uma parte da programação ao vivo e parte posteriormente pelos links do YouTube	4		Não	4		Sim	5	5	Dificuldade de me concentrar durante o evento;Preenchimento das listas de presença	Fundamental, manter em futuros eventos	Foi bom, mas evitar em futuros eventos	Não	Não participei :(	3
2021/03/19 4:09:45 PM GMT-3	Ciências biológicas	Doutoranda (o)	Química Biológica	5	Não	Assisti uma parte da programação ao vivo e parte posteriormente pelos links do YouTube	5		Não	3		Não	3	5	Problemas com a conexão de internet	Fundamental, manter em futuros eventos	Fundamental, manter em futuros eventos	Não	Não participei :(	3
2021/03/21 12:23:06 PM GMT-3	Biotecnologia	Estudante de graduação	ensino medio completo	5	Sim	Assisti uma parte da programação ao vivo e parte posteriormente pelos links do YouTube	5		Não	5		Não	3	5	Problemas com a conexão de internet;Dificuldade de me concentrar durante o evento	Fundamental, manter em futuros eventos	Fundamental, manter em futuros eventos	Sim	#TeamJaguatirica	5
2021/03/24 9:31:54 AM GMT-3	Ciências biológicas	Pós-doc em andamento	Biotecnologia	5	Sim	Assisti a programação completa ao vivo	4		Sim	4		Sim	5	5	Dificuldade de me concentrar durante o evento;Dificuldade em realizar doações para a campanha beneficente "Projeto X"	Fundamental, manter em futuros eventos	Fundamental, manter em futuros eventos	Não	Não participei :(	3
2021/03/24 5:32:25 PM GMT-3	Ciências biológicas	Mestranda (o)	Ciências Agrárias (Fisiologia Vegetal)	5	Sim	Assisti a programação completa ao vivo	5		Sim	5		Sim	4	4	Problemas com a conexão de internet;Preenchimento das listas de presença	Fundamental, manter em futuros eventos	Fundamental, manter em futuros eventos	Não	Não participei :(	1		Adorei a organização e a dinâmica do evento	Acho que a questão das listas foram complicado	Esperando o próximo! Muito bom. Parabéns aos envolvidos.
2021/03/24 5:33:11 PM GMT-3	Ciências biológicas	Mestranda (o)	Ciências Agrárias (Fisiologia Vegetal)	5	Sim	Assisti a programação completa ao vivo	5		Sim	5		Sim	4	4	Problemas com a conexão de internet;Preenchimento das listas de presença	Fundamental, manter em futuros eventos	Fundamental, manter em futuros eventos	Não	Não participei :(	1		Adorei a organização e a dinâmica do evento	Acho que a questão das listas foram complicado	Esperando o próximo! Muito bom. Parabéns aos envolvidos.
2021/03/25 10:16:59 PM GMT-3	Ciências biológicas	Pós-doc concluído	Biociências e Biotecnologia	5	Sim	Assisti a programação completa ao vivo	5	Não	Sim	5	nao	Sim	4	5	nenhuma	Fundamental, manter em futuros eventos	Fundamental, manter em futuros eventos	Sim	#TeamJaguatirica	5	não	muito bom, parabéns		Não tenho nada acrescentar
2021/03/31 5:08:56 PM GMT-3	Ciências biológicas	Doutoranda (o)	Genética	5	Sim	Assisti uma parte da programação ao vivo e parte posteriormente pelos links do YouTube	5		Sim	5		Não	1	4	Problemas com a conexão de internet;Dificuldade de me concentrar durante o evento;Acesso aos e-mails com notícias do I WOB20	Fundamental, manter em futuros eventos	Fundamental, manter em futuros eventos	Não	Não participei :(	1
2021/03/31 5:26:00 PM GMT-3	Ciências biológicas	Doutoranda (o)	Genética	5	Sim	Assisti uma parte da programação ao vivo e parte posteriormente pelos links do YouTube	5		Não	5		Não	2	4	Problemas com a conexão de internet;Dificuldade de me concentrar durante o evento;Acesso aos e-mails com notícias do I WOB20	Fundamental, manter em futuros eventos	Fundamental, manter em futuros eventos	Não	Não participei :(	5
2021/04/08 8:29:46 AM GMT-3	Biomedicina	Graduada/Graduado	Biomedicina	5	Sim	Assisti a programação completa pelas gravações no YouTube	5		Sim	5		Sim	5	5	Preenchimento das listas de presença	Fundamental, manter em futuros eventos	Fundamental, manter em futuros eventos	Não	Não participei :(	2
2021/04/12 4:55:04 PM GMT-3	Biotecnologia	Estudante de graduação	Biotecnologia	4	Sim	Assisti uma parte da programação ao vivo e parte posteriormente pelos links do YouTube	4		Não	4		Sim	5	4	Problemas com a conexão de internet;Dificuldade de me concentrar durante o evento	Fundamental, manter em futuros eventos	Fundamental, manter em futuros eventos	Não	Não participei :(	3
2021/04/12 10:24:58 PM GMT-3	Ciências biológicas	Estudante de graduação	Biotecnologia	5	Sim	Assisti uma parte da programação ao vivo e parte posteriormente pelos links do YouTube	5	Continuem com o trabalho excelente de divulgação cientifica, é muito importante para pessoas de outras regiões ter eventos como esse online.	Sim	5		Sim	5	5	Problemas com a conexão de internet;Acesso aos e-mails com notícias do I WOB20	Fundamental, manter em futuros eventos	Fundamental, manter em futuros eventos	Não	Não participei :(	5	Com certeza na próxima irei participar.
2021/04/12 10:25:35 PM GMT-3	Ciências biológicas	Estudante de graduação	Biotecnologia	5	Sim	Assisti uma parte da programação ao vivo e parte posteriormente pelos links do YouTube	5	Continuem com o trabalho excelente de divulgação cientifica, é muito importante para pessoas de outras regiões ter eventos como esse online.	Sim	5		Sim	5	5	Problemas com a conexão de internet;Acesso aos e-mails com notícias do I WOB20	Fundamental, manter em futuros eventos	Fundamental, manter em futuros eventos	Não	Não participei :(	5	Com certeza na próxima irei participar.
2021/04/16 10:19:18 AM GMT-3	Ciências biológicas	Estudante de graduação	Técnico em Informática	4	Não	Assisti uma parte da programação ao vivo e parte posteriormente pelos links do YouTube	4		Sim	4		Sim	5	4	Dificuldade de me concentrar durante o evento	Fundamental, manter em futuros eventos	Fundamental, manter em futuros eventos	Não	Não participei :(	3
2021/04/16 5:59:26 PM GMT-3	Engenharia química	Estudante de graduação	Engenharia química	5	Sim	Assisti a programação completa ao vivo	5		Sim	5		Sim	5	5	Problemas com a conexão de internet	Fundamental, manter em futuros eventos	Fundamental, manter em futuros eventos	Não	Não participei :(	3
2021/04/16 9:17:16 PM GMT-3	Ciências da Saúde	Estudante de graduação	Biomedicina	5	Sim	Assisti uma parte da programação ao vivo e parte posteriormente pelos links do YouTube	5		Sim	5		Sim	5	5	Preenchimento das listas de presença	Fundamental, manter em futuros eventos	Fundamental, manter em futuros eventos	Não	Não participei :(	5
