# Supplementary material for: From In-Person to the Online World: Insights Into Organizing Events in Bioinformatics
Source: Front Bioinform. 2021 Sep 7;1:711463. doi: 10.3389/fbinf.2021.711463 (PMC9581051; doi:10.3389/fbinf.2021.711463)
Supplement: Supplementary file 3 [file Table1.XLSX]

## Sheet: supplementary_material_-_Table_
Carimbo de data/hora	Qual é a sua faixa etária?	Você gostaria de participar do nosso estudo?	Hora de criar o seu identificador anônimo! Escolha um animal, um número e uma letra, nessa ordem - Ex.: Jabuti3D; Jaguatirica2B; etc.	Qual é a sua formação acadêmica? (maior e atual)	Ao longo do IV Curso de Verão em Bioinformática da UFMG, você participará de algum mini-curso?	Como você avalia os seus conhecimentos em linguagens de programação?	Como você avalia os seus conhecimentos em GNU/Linux?	Como você avalia os seus conhecimentos em modelagem molecular?	Como você avalia os seus conhecimentos em Bioinformática?	Você possui conhecimentos em genômica?	Você possui conhecimentos em proteômica?	Você possui conhecimentos em transcriptômica?	Você possui conhecimentos em epigenética?	Você possui conhecimentos em metagenômica?	Você possui conhecimentos em filogenética?
2020/01/23 4:28:26 PM GMT-3	Entre 18 e 25 anos	Sim! Seria uma honra! :))	Camaleao7M	Graduação (a partir do 2º semestre)	Infelizmente, não participarei.	0	0	0	0	Sim, possuo algum conhecimento sobre o tema...	Já ouvi falar, mas não possuo conhecimentos de fato...	Sim, possuo algum conhecimento sobre o tema...	Sim, possuo algum conhecimento sobre o tema...	Já ouvi falar, mas não possuo conhecimentos de fato...	Já ouvi falar, mas não possuo conhecimentos de fato...
2020/01/23 4:28:45 PM GMT-3	Entre 18 e 25 anos	Sim! Seria uma honra! :))	Cachorro1A	Doutorando	Simmm! Claro!	0	1	1	0	Sim, possuo algum conhecimento sobre o tema...	Já ouvi falar, mas não possuo conhecimentos de fato...	Já ouvi falar, mas não possuo conhecimentos de fato...	Sim, possuo algum conhecimento sobre o tema...	Nunca ouvi falar...	Já ouvi falar, mas não possuo conhecimentos de fato...
2020/01/23 4:31:17 PM GMT-3	Entre 18 e 25 anos	Sim! Seria uma honra! :))	Lince9E	Graduação (a partir do 2º semestre)	Simmm! Claro!	0	0	0	0	Já ouvi falar, mas não possuo conhecimentos de fato...	Já ouvi falar, mas não possuo conhecimentos de fato...	Já ouvi falar, mas não possuo conhecimentos de fato...	Sim, possuo algum conhecimento sobre o tema...	Já ouvi falar, mas não possuo conhecimentos de fato...	Já ouvi falar, mas não possuo conhecimentos de fato...
2020/01/23 4:31:59 PM GMT-3	Entre 18 e 25 anos	Sim! Seria uma honra! :))	Capivara6A	Graduação (a partir do 2º semestre)	Simmm! Claro!	1	1	0	0	Sim, possuo algum conhecimento sobre o tema...	Nunca ouvi falar...	Já ouvi falar, mas não possuo conhecimentos de fato...	Sim, possuo algum conhecimento sobre o tema...	Nunca ouvi falar...	Já ouvi falar, mas não possuo conhecimentos de fato...
2020/01/23 4:33:27 PM GMT-3	Entre 18 e 25 anos	Sim! Seria uma honra! :))	Gato2M	Graduação (a partir do 2º semestre)	Simmm! Claro!	1	3	0	3	Sim, possuo algum conhecimento sobre o tema...	Sim, possuo algum conhecimento sobre o tema...	Sim, possuo algum conhecimento sobre o tema...	Sim, possuo algum conhecimento sobre o tema...	Sim, possuo algum conhecimento sobre o tema...	Sim, possuo algum conhecimento sobre o tema...
2020/01/23 4:33:42 PM GMT-3	Entre 18 e 25 anos	Sim! Seria uma honra! :))	Guaxinim7G	Mestrando	Simmm! Claro!	6	6	6	4	Já ouvi falar, mas não possuo conhecimentos de fato...	Sim, possuo algum conhecimento sobre o tema...	Já ouvi falar, mas não possuo conhecimentos de fato...	Já ouvi falar, mas não possuo conhecimentos de fato...	Já ouvi falar, mas não possuo conhecimentos de fato...	Já ouvi falar, mas não possuo conhecimentos de fato...
2020/01/23 4:33:45 PM GMT-3	Entre 26 e 30 anos	Okay, vamos lá...	Gaviao1A	Mestrando	Infelizmente, não participarei.	0	2	0	2	Sim, possuo algum conhecimento sobre o tema...	Já ouvi falar, mas não possuo conhecimentos de fato...	Já ouvi falar, mas não possuo conhecimentos de fato...	Já ouvi falar, mas não possuo conhecimentos de fato...	Sim, possuo algum conhecimento sobre o tema...	Sim, possuo algum conhecimento sobre o tema...
2020/01/23 4:34:19 PM GMT-3	Entre 18 e 25 anos	Okay, vamos lá...	Golfinho8Y	Graduação (a partir do 2º semestre)	Simmm! Claro!	4	3	0	0	Já ouvi falar, mas não possuo conhecimentos de fato...	Já ouvi falar, mas não possuo conhecimentos de fato...	Já ouvi falar, mas não possuo conhecimentos de fato...	Já ouvi falar, mas não possuo conhecimentos de fato...	Já ouvi falar, mas não possuo conhecimentos de fato...	Já ouvi falar, mas não possuo conhecimentos de fato...
2020/01/23 4:35:02 PM GMT-3	Entre 18 e 25 anos	Sim! Seria uma honra! :))	Girafa4D	Graduação (a partir do 2º semestre)	Simmm! Claro!	2	4	2	2	Sim, possuo algum conhecimento sobre o tema...	Já ouvi falar, mas não possuo conhecimentos de fato...	Já ouvi falar, mas não possuo conhecimentos de fato...	Já ouvi falar, mas não possuo conhecimentos de fato...	Sim, possuo algum conhecimento sobre o tema...	Sim, possuo algum conhecimento sobre o tema...
2020/01/23 4:35:25 PM GMT-3	Entre 18 e 25 anos	Sim! Seria uma honra! :))	Harpia2L	Mestrando	Simmm! Claro!	2	1	1	3	Sim, possuo algum conhecimento sobre o tema...	Sim, possuo algum conhecimento sobre o tema...	Sim, possuo conhecimentos avançados no tema.	Sim, possuo conhecimentos avançados no tema.	Sim, possuo algum conhecimento sobre o tema...	Sim, possuo algum conhecimento sobre o tema...
2020/01/23 4:35:30 PM GMT-3	Entre 18 e 25 anos	Sim! Seria uma honra! :))	Peixe8H	Graduação (a partir do 2º semestre)	Infelizmente, não participarei.	1	1	0	2	Já ouvi falar, mas não possuo conhecimentos de fato...	Já ouvi falar, mas não possuo conhecimentos de fato...	Já ouvi falar, mas não possuo conhecimentos de fato...	Já ouvi falar, mas não possuo conhecimentos de fato...	Já ouvi falar, mas não possuo conhecimentos de fato...	Já ouvi falar, mas não possuo conhecimentos de fato...
2020/01/23 4:36:08 PM GMT-3	Entre 18 e 25 anos	Sim! Seria uma honra! :))	Pulga9G	Graduação (a partir do 2º semestre)	Infelizmente, não participarei.	3	3	0	1	Já ouvi falar, mas não possuo conhecimentos de fato...	Já ouvi falar, mas não possuo conhecimentos de fato...	Já ouvi falar, mas não possuo conhecimentos de fato...	Já ouvi falar, mas não possuo conhecimentos de fato...	Já ouvi falar, mas não possuo conhecimentos de fato...	Já ouvi falar, mas não possuo conhecimentos de fato...
2020/01/23 4:37:30 PM GMT-3	Entre 18 e 25 anos	Sim! Seria uma honra! :))	Girafa2T	Graduação (a partir do 2º semestre)	Infelizmente, não participarei.	0	1	0	1	Já ouvi falar, mas não possuo conhecimentos de fato...	Já ouvi falar, mas não possuo conhecimentos de fato...	Já ouvi falar, mas não possuo conhecimentos de fato...	Sim, possuo algum conhecimento sobre o tema...	Já ouvi falar, mas não possuo conhecimentos de fato...	Sim, possuo algum conhecimento sobre o tema...
2020/01/23 4:38:03 PM GMT-3	Entre 18 e 25 anos	Sim! Seria uma honra! :))	Morcego2M	Graduação (a partir do 2º semestre)	Simmm! Claro!	1	0	0	1	Já ouvi falar, mas não possuo conhecimentos de fato...	Já ouvi falar, mas não possuo conhecimentos de fato...	Nunca ouvi falar...	Já ouvi falar, mas não possuo conhecimentos de fato...	Nunca ouvi falar...	Sim, possuo conhecimentos avançados no tema.
2020/01/23 4:38:29 PM GMT-3	Entre 18 e 25 anos	Sim! Seria uma honra! :))	Jabuti7D	Graduação (a partir do 2º semestre)	Infelizmente, não participarei.	0	0	0	0	Sim, possuo algum conhecimento sobre o tema...	Já ouvi falar, mas não possuo conhecimentos de fato...	Já ouvi falar, mas não possuo conhecimentos de fato...	Sim, possuo algum conhecimento sobre o tema...	Já ouvi falar, mas não possuo conhecimentos de fato...	Sim, possuo algum conhecimento sobre o tema...
2020/01/23 4:38:51 PM GMT-3	Entre 18 e 25 anos	Sim! Seria uma honra! :))	Gato8L	Graduação (a partir do 2º semestre)	Simmm! Claro!	1	0	1	1	Sim, possuo algum conhecimento sobre o tema...	Já ouvi falar, mas não possuo conhecimentos de fato...	Já ouvi falar, mas não possuo conhecimentos de fato...	Sim, possuo algum conhecimento sobre o tema...	Já ouvi falar, mas não possuo conhecimentos de fato...	Já ouvi falar, mas não possuo conhecimentos de fato...
2020/01/23 4:40:43 PM GMT-3	Entre 31 e 45 anos	Sim! Seria uma honra! :))	Coiote1A	Doutorando	Simmm! Claro!	3	3	2	3	Sim, possuo algum conhecimento sobre o tema...	Sim, possuo algum conhecimento sobre o tema...	Sim, possuo algum conhecimento sobre o tema...	Sim, possuo algum conhecimento sobre o tema...	Sim, possuo algum conhecimento sobre o tema...	Sim, possuo algum conhecimento sobre o tema...
2020/01/23 4:41:02 PM GMT-3	Entre 31 e 45 anos	Sim! Seria uma honra! :))	Carneiro8B	Doutorando	Simmm! Claro!	0	0	1	1	Sim, possuo algum conhecimento sobre o tema...	Sim, possuo algum conhecimento sobre o tema...	Sim, possuo algum conhecimento sobre o tema...	Já ouvi falar, mas não possuo conhecimentos de fato...	Já ouvi falar, mas não possuo conhecimentos de fato...	Já ouvi falar, mas não possuo conhecimentos de fato...
2020/01/23 4:41:36 PM GMT-3	Entre 18 e 25 anos	Sim! Seria uma honra! :))	Leao7T	Doutorando	Simmm! Claro!	0	1	3	4	Já ouvi falar, mas não possuo conhecimentos de fato...	Já ouvi falar, mas não possuo conhecimentos de fato...	Já ouvi falar, mas não possuo conhecimentos de fato...	Já ouvi falar, mas não possuo conhecimentos de fato...	Já ouvi falar, mas não possuo conhecimentos de fato...	Já ouvi falar, mas não possuo conhecimentos de fato...
2020/01/23 4:42:48 PM GMT-3	Entre 18 e 25 anos	Sim! Seria uma honra! :))	Guaxinim7G	Mestrando	Simmm! Claro!	6	6	6	4	Já ouvi falar, mas não possuo conhecimentos de fato...	Sim, possuo algum conhecimento sobre o tema...	Já ouvi falar, mas não possuo conhecimentos de fato...	Já ouvi falar, mas não possuo conhecimentos de fato...	Já ouvi falar, mas não possuo conhecimentos de fato...	Já ouvi falar, mas não possuo conhecimentos de fato...
2020/01/23 4:43:22 PM GMT-3	Entre 18 e 25 anos	Não, obrigado. rsrs	Foca25A	Doutorando	Simmm! Claro!	0	2	0	1	Sim, possuo algum conhecimento sobre o tema...	Sim, possuo algum conhecimento sobre o tema...	Sim, possuo algum conhecimento sobre o tema...	Sim, possuo algum conhecimento sobre o tema...	Já ouvi falar, mas não possuo conhecimentos de fato...	Já ouvi falar, mas não possuo conhecimentos de fato...
2020/01/23 4:45:07 PM GMT-3	Entre 18 e 25 anos	Sim! Seria uma honra! :))	Onça1S	Graduação (a partir do 2º semestre)	Infelizmente, não participarei.	0	0	0	1	Já ouvi falar, mas não possuo conhecimentos de fato...	Já ouvi falar, mas não possuo conhecimentos de fato...	Já ouvi falar, mas não possuo conhecimentos de fato...	Sim, possuo algum conhecimento sobre o tema...	Já ouvi falar, mas não possuo conhecimentos de fato...	Já ouvi falar, mas não possuo conhecimentos de fato...
2020/01/23 4:45:51 PM GMT-3	Entre 18 e 25 anos	Sim! Seria uma honra! :))	Coelho1G	Graduação (a partir do 2º semestre)	Simmm! Claro!	1	1	0	1	Sim, possuo algum conhecimento sobre o tema...	Já ouvi falar, mas não possuo conhecimentos de fato...	Sim, possuo algum conhecimento sobre o tema...	Sim, possuo conhecimentos avançados no tema.	Sim, possuo algum conhecimento sobre o tema...	Nunca ouvi falar...
2020/01/23 4:47:21 PM GMT-3	Entre 26 e 30 anos	Okay, vamos lá...	Cacatua1A	Graduação (a partir do 2º semestre)	Simmm! Claro!	0	0	0	0	Sim, possuo algum conhecimento sobre o tema...	Já ouvi falar, mas não possuo conhecimentos de fato...	Já ouvi falar, mas não possuo conhecimentos de fato...	Já ouvi falar, mas não possuo conhecimentos de fato...	Já ouvi falar, mas não possuo conhecimentos de fato...	Sim, possuo algum conhecimento sobre o tema...
2020/01/23 4:50:39 PM GMT-3	Entre 18 e 25 anos	Sim! Seria uma honra! :))	Jubarte2A	Graduação (a partir do 2º semestre)	Simmm! Claro!	2	2	1	2	Já ouvi falar, mas não possuo conhecimentos de fato...	Já ouvi falar, mas não possuo conhecimentos de fato...	Já ouvi falar, mas não possuo conhecimentos de fato...	Sim, possuo algum conhecimento sobre o tema...	Sim, possuo algum conhecimento sobre o tema...	Sim, possuo algum conhecimento sobre o tema...
2020/01/23 4:51:01 PM GMT-3	Entre 31 e 45 anos	Sim! Seria uma honra! :))	Carcará 5B	Doutorado completo	Simmm! Claro!	1	1	1	2	Sim, possuo algum conhecimento sobre o tema...	Sim, possuo conhecimentos avançados no tema.	Sim, possuo algum conhecimento sobre o tema...	Sim, possuo algum conhecimento sobre o tema...	Sim, possuo algum conhecimento sobre o tema...	Sim, possuo algum conhecimento sobre o tema...
2020/01/23 4:51:11 PM GMT-3	Entre 31 e 45 anos	Okay, vamos lá...	Coruja1A	Pós-doutorando	Simmm! Claro!	1	0	1	1	Sim, possuo algum conhecimento sobre o tema...	Sim, possuo algum conhecimento sobre o tema...	Sim, possuo algum conhecimento sobre o tema...	Sim, possuo algum conhecimento sobre o tema...	Sim, possuo algum conhecimento sobre o tema...	Sim, possuo algum conhecimento sobre o tema...
2020/01/23 4:54:20 PM GMT-3	Entre 26 e 30 anos	Sim! Seria uma honra! :))	Leão3A	Mestrando	Simmm! Claro!	0	1	2	2	Sim, possuo algum conhecimento sobre o tema...	Já ouvi falar, mas não possuo conhecimentos de fato...	Sim, possuo algum conhecimento sobre o tema...	Nunca ouvi falar...	Sim, possuo conhecimentos avançados no tema.	Sim, possuo algum conhecimento sobre o tema...
2020/01/23 5:07:25 PM GMT-3	Entre 26 e 30 anos	Okay, vamos lá...	evnthorizon	Graduação (a partir do 2º semestre)	Simmm! Claro!	2	1	0	2	Sim, possuo conhecimentos avançados no tema.	Sim, possuo algum conhecimento sobre o tema...	Sim, possuo conhecimentos avançados no tema.	Já ouvi falar, mas não possuo conhecimentos de fato...	Sim, possuo algum conhecimento sobre o tema...	Sim, possuo algum conhecimento sobre o tema...
2020/01/23 5:08:07 PM GMT-3	Entre 18 e 25 anos	Sim! Seria uma honra! :))	Elefante7K	Graduação (a partir do 2º semestre)	Simmm! Claro!	2	3	3	4	Sim, possuo algum conhecimento sobre o tema...	Sim, possuo algum conhecimento sobre o tema...	Sim, possuo algum conhecimento sobre o tema...	Sim, possuo algum conhecimento sobre o tema...	Sim, possuo algum conhecimento sobre o tema...	Sim, possuo conhecimentos avançados no tema.
2020/01/23 5:08:26 PM GMT-3	Entre 18 e 25 anos	Okay, vamos lá...	Tigre3k	Graduação (a partir do 2º semestre)	Infelizmente, não participarei.	0	0	0	1	Sim, possuo algum conhecimento sobre o tema...	Já ouvi falar, mas não possuo conhecimentos de fato...	Já ouvi falar, mas não possuo conhecimentos de fato...	Sim, possuo algum conhecimento sobre o tema...	Já ouvi falar, mas não possuo conhecimentos de fato...	Já ouvi falar, mas não possuo conhecimentos de fato...
2020/01/23 5:09:20 PM GMT-3	Entre 18 e 25 anos	Sim! Seria uma honra! :))	Borboleta6D	Mestrando	Simmm! Claro!	0	1	4	3	Já ouvi falar, mas não possuo conhecimentos de fato...	Sim, possuo algum conhecimento sobre o tema...	Já ouvi falar, mas não possuo conhecimentos de fato...	Já ouvi falar, mas não possuo conhecimentos de fato...	Já ouvi falar, mas não possuo conhecimentos de fato...	Já ouvi falar, mas não possuo conhecimentos de fato...
2020/01/23 5:09:21 PM GMT-3	Entre 18 e 25 anos	Okay, vamos lá...	DarthVader66	Graduação (a partir do 2º semestre)	Simmm! Claro!	3	5	5	4	Sim, possuo algum conhecimento sobre o tema...	Sim, possuo algum conhecimento sobre o tema...	Sim, possuo algum conhecimento sobre o tema...	Já ouvi falar, mas não possuo conhecimentos de fato...	Já ouvi falar, mas não possuo conhecimentos de fato...	Já ouvi falar, mas não possuo conhecimentos de fato...
2020/01/23 5:12:55 PM GMT-3	Entre 18 e 25 anos	Sim! Seria uma honra! :))	Águia13S	Graduação (a partir do 2º semestre)	Simmm! Claro!	3	1	1	2	Já ouvi falar, mas não possuo conhecimentos de fato...	Já ouvi falar, mas não possuo conhecimentos de fato...	Já ouvi falar, mas não possuo conhecimentos de fato...	Nunca ouvi falar...	Nunca ouvi falar...	Já ouvi falar, mas não possuo conhecimentos de fato...
2020/01/23 5:17:34 PM GMT-3	Entre 18 e 25 anos	Sim! Seria uma honra! :))	Papagaio5L	Mestrando	Infelizmente, não participarei.	2	2	3	3	Sim, possuo algum conhecimento sobre o tema...	Sim, possuo algum conhecimento sobre o tema...	Sim, possuo algum conhecimento sobre o tema...	Já ouvi falar, mas não possuo conhecimentos de fato...	Sim, possuo algum conhecimento sobre o tema...	Sim, possuo algum conhecimento sobre o tema...
2020/01/23 5:20:13 PM GMT-3	Entre 31 e 45 anos	Okay, vamos lá...	Gato03E	Doutorado completo	Simmm! Claro!	1	3	4	2	Já ouvi falar, mas não possuo conhecimentos de fato...	Já ouvi falar, mas não possuo conhecimentos de fato...	Já ouvi falar, mas não possuo conhecimentos de fato...	Nunca ouvi falar...	Nunca ouvi falar...	Nunca ouvi falar...
2020/01/23 5:38:01 PM GMT-3	Entre 31 e 45 anos	Okay, vamos lá...	Juba4P	Pós-doutorando	Simmm! Claro!	1	1	0	1	Sim, possuo algum conhecimento sobre o tema...	Já ouvi falar, mas não possuo conhecimentos de fato...	Já ouvi falar, mas não possuo conhecimentos de fato...	Já ouvi falar, mas não possuo conhecimentos de fato...	Sim, possuo algum conhecimento sobre o tema...	Sim, possuo algum conhecimento sobre o tema...
2020/01/23 5:40:42 PM GMT-3	Entre 31 e 45 anos	Sim! Seria uma honra! :))	Saruê20V	Doutorando	Simmm! Claro!	2	0	0	0	Já ouvi falar, mas não possuo conhecimentos de fato...	Sim, possuo algum conhecimento sobre o tema...	Já ouvi falar, mas não possuo conhecimentos de fato...	Já ouvi falar, mas não possuo conhecimentos de fato...	Já ouvi falar, mas não possuo conhecimentos de fato...	Já ouvi falar, mas não possuo conhecimentos de fato...
2020/01/23 5:41:10 PM GMT-3	Entre 18 e 25 anos	Sim! Seria uma honra! :))	Jatoba23Q	Mestrado completo	Simmm! Claro!	0	0	0	1	Sim, possuo algum conhecimento sobre o tema...	Já ouvi falar, mas não possuo conhecimentos de fato...	Já ouvi falar, mas não possuo conhecimentos de fato...	Já ouvi falar, mas não possuo conhecimentos de fato...	Já ouvi falar, mas não possuo conhecimentos de fato...	Sim, possuo algum conhecimento sobre o tema...
2020/01/23 5:41:26 PM GMT-3	Entre 46 e 59 anos	Okay, vamos lá...	Ornitorrinco8A	Pós-doutorado completo	Infelizmente, não participarei.	5	1	3	3	Sim, possuo algum conhecimento sobre o tema...	Já ouvi falar, mas não possuo conhecimentos de fato...	Já ouvi falar, mas não possuo conhecimentos de fato...	Já ouvi falar, mas não possuo conhecimentos de fato...	Já ouvi falar, mas não possuo conhecimentos de fato...	Já ouvi falar, mas não possuo conhecimentos de fato...
2020/01/23 5:49:34 PM GMT-3	Entre 18 e 25 anos	Okay, vamos lá...	Fly01	Mestrando	Simmm! Claro!	2	2	2	2	Sim, possuo algum conhecimento sobre o tema...	Sim, possuo algum conhecimento sobre o tema...	Sim, possuo algum conhecimento sobre o tema...	Sim, possuo algum conhecimento sobre o tema...	Sim, possuo algum conhecimento sobre o tema...	Sim, possuo algum conhecimento sobre o tema...
2020/01/23 5:50:39 PM GMT-3	Entre 18 e 25 anos	Sim! Seria uma honra! :))	Gato7H	Graduação (a partir do 2º semestre)	Infelizmente, não participarei.	0	0	0	2	Nunca ouvi falar...	Nunca ouvi falar...	Nunca ouvi falar...	Nunca ouvi falar...	Nunca ouvi falar...	Sim, possuo algum conhecimento sobre o tema...
2020/01/23 5:51:37 PM GMT-3	Entre 18 e 25 anos	Okay, vamos lá...	Tigre7T	Graduação (a partir do 2º semestre)	Infelizmente, não participarei.	3	3	1	1	Já ouvi falar, mas não possuo conhecimentos de fato...	Nunca ouvi falar...	Nunca ouvi falar...	Nunca ouvi falar...	Nunca ouvi falar...	Nunca ouvi falar...
2020/01/23 5:55:19 PM GMT-3	Entre 18 e 25 anos	Sim! Seria uma honra! :))	Guaxinim7G	Mestrando	Simmm! Claro!	6	6	6	4	Já ouvi falar, mas não possuo conhecimentos de fato...	Sim, possuo algum conhecimento sobre o tema...	Já ouvi falar, mas não possuo conhecimentos de fato...	Já ouvi falar, mas não possuo conhecimentos de fato...	Já ouvi falar, mas não possuo conhecimentos de fato...	Já ouvi falar, mas não possuo conhecimentos de fato...
2020/01/23 6:19:37 PM GMT-3	Entre 26 e 30 anos	Okay, vamos lá...	Lobo7N	Doutorando	Simmm! Claro!	0	0	1	1	Sim, possuo algum conhecimento sobre o tema...	Já ouvi falar, mas não possuo conhecimentos de fato...	Já ouvi falar, mas não possuo conhecimentos de fato...	Sim, possuo algum conhecimento sobre o tema...	Sim, possuo algum conhecimento sobre o tema...	Sim, possuo algum conhecimento sobre o tema...
2020/01/23 6:23:52 PM GMT-3	Entre 18 e 25 anos	Sim! Seria uma honra! :))	Penguin8T	Graduação (a partir do 2º semestre)	Simmm! Claro!	0	0	1	0	Já ouvi falar, mas não possuo conhecimentos de fato...	Nunca ouvi falar...	Já ouvi falar, mas não possuo conhecimentos de fato...	Sim, possuo algum conhecimento sobre o tema...	Nunca ouvi falar...	Sim, possuo algum conhecimento sobre o tema...
2020/01/23 6:27:04 PM GMT-3	Entre 31 e 45 anos	Okay, vamos lá...	Zebra1A	Doutorando	Simmm! Claro!	0	0	0	0	Já ouvi falar, mas não possuo conhecimentos de fato...	Já ouvi falar, mas não possuo conhecimentos de fato...	Nunca ouvi falar...	Nunca ouvi falar...	Já ouvi falar, mas não possuo conhecimentos de fato...	Nunca ouvi falar...
2020/01/23 6:31:28 PM GMT-3	Entre 18 e 25 anos	Sim! Seria uma honra! :))	Raposa9C	Graduação (a partir do 2º semestre)	Simmm! Claro!	1	0	2	2	Sim, possuo algum conhecimento sobre o tema...	Já ouvi falar, mas não possuo conhecimentos de fato...	Já ouvi falar, mas não possuo conhecimentos de fato...	Sim, possuo algum conhecimento sobre o tema...	Já ouvi falar, mas não possuo conhecimentos de fato...	Já ouvi falar, mas não possuo conhecimentos de fato...
2020/01/23 6:31:49 PM GMT-3	Entre 26 e 30 anos	Sim! Seria uma honra! :))	Orca4T	Mestrado completo	Infelizmente, não participarei.	0	0	0	2	Já ouvi falar, mas não possuo conhecimentos de fato...	Já ouvi falar, mas não possuo conhecimentos de fato...	Já ouvi falar, mas não possuo conhecimentos de fato...	Já ouvi falar, mas não possuo conhecimentos de fato...	Já ouvi falar, mas não possuo conhecimentos de fato...	Sim, possuo algum conhecimento sobre o tema...
2020/01/23 6:42:55 PM GMT-3	Entre 18 e 25 anos	Sim! Seria uma honra! :))	Lêmure3D	Graduação (a partir do 2º semestre)	Simmm! Claro!	5	4	1	3	Sim, possuo algum conhecimento sobre o tema...	Já ouvi falar, mas não possuo conhecimentos de fato...	Já ouvi falar, mas não possuo conhecimentos de fato...	Já ouvi falar, mas não possuo conhecimentos de fato...	Já ouvi falar, mas não possuo conhecimentos de fato...	Já ouvi falar, mas não possuo conhecimentos de fato...
2020/01/23 6:48:44 PM GMT-3	Entre 18 e 25 anos	Okay, vamos lá...	Elefante 21	Graduação (a partir do 2º semestre)	Simmm! Claro!	5	5	0	0	Nunca ouvi falar...	Nunca ouvi falar...	Nunca ouvi falar...	Sim, possuo algum conhecimento sobre o tema...	Nunca ouvi falar...	Já ouvi falar, mas não possuo conhecimentos de fato...
2020/01/23 6:49:51 PM GMT-3	Entre 18 e 25 anos	Sim! Seria uma honra! :))	Osga1A	Mestrando	Simmm! Claro!	1	2	0	1	Sim, possuo algum conhecimento sobre o tema...	Sim, possuo algum conhecimento sobre o tema...	Sim, possuo algum conhecimento sobre o tema...	Já ouvi falar, mas não possuo conhecimentos de fato...	Já ouvi falar, mas não possuo conhecimentos de fato...	Sim, possuo algum conhecimento sobre o tema...
2020/01/23 6:57:52 PM GMT-3	Entre 18 e 25 anos	Okay, vamos lá...	Leao2M	Graduação (a partir do 2º semestre)	Simmm! Claro!	0	0	0	0	Já ouvi falar, mas não possuo conhecimentos de fato...	Já ouvi falar, mas não possuo conhecimentos de fato...	Já ouvi falar, mas não possuo conhecimentos de fato...	Já ouvi falar, mas não possuo conhecimentos de fato...	Já ouvi falar, mas não possuo conhecimentos de fato...	Já ouvi falar, mas não possuo conhecimentos de fato...
2020/01/23 7:05:38 PM GMT-3	Entre 18 e 25 anos	Sim! Seria uma honra! :))	Panda2D	Graduação (a partir do 2º semestre)	Simmm! Claro!	0	0	0	1	Já ouvi falar, mas não possuo conhecimentos de fato...	Já ouvi falar, mas não possuo conhecimentos de fato...	Já ouvi falar, mas não possuo conhecimentos de fato...	Já ouvi falar, mas não possuo conhecimentos de fato...	Já ouvi falar, mas não possuo conhecimentos de fato...	Nunca ouvi falar...
2020/01/23 7:09:36 PM GMT-3	Entre 18 e 25 anos	Okay, vamos lá...	Hipopótamo7I	Mestrando	Infelizmente, não participarei.	1	1	0	3	Sim, possuo algum conhecimento sobre o tema...	Já ouvi falar, mas não possuo conhecimentos de fato...	Já ouvi falar, mas não possuo conhecimentos de fato...	Sim, possuo algum conhecimento sobre o tema...	Sim, possuo algum conhecimento sobre o tema...	Sim, possuo algum conhecimento sobre o tema...
2020/01/23 7:15:51 PM GMT-3	Entre 18 e 25 anos	Sim! Seria uma honra! :))	Lesma6K	Graduação (a partir do 2º semestre)	Infelizmente, não participarei.	0	0	0	1	Sim, possuo algum conhecimento sobre o tema...	Já ouvi falar, mas não possuo conhecimentos de fato...	Já ouvi falar, mas não possuo conhecimentos de fato...	Sim, possuo algum conhecimento sobre o tema...	Já ouvi falar, mas não possuo conhecimentos de fato...	Já ouvi falar, mas não possuo conhecimentos de fato...
2020/01/23 7:19:38 PM GMT-3	Entre 18 e 25 anos	Sim! Seria uma honra! :))	Esponja1M	Mestrando	Simmm! Claro!	0	0	0	0	Sim, possuo algum conhecimento sobre o tema...	Já ouvi falar, mas não possuo conhecimentos de fato...	Já ouvi falar, mas não possuo conhecimentos de fato...	Nunca ouvi falar...	Sim, possuo algum conhecimento sobre o tema...	Já ouvi falar, mas não possuo conhecimentos de fato...
2020/01/23 7:31:22 PM GMT-3	Entre 26 e 30 anos	Sim! Seria uma honra! :))	Leo256	Graduação (a partir do 2º semestre)	Simmm! Claro!	2	3	0	4	Sim, possuo algum conhecimento sobre o tema...	Sim, possuo algum conhecimento sobre o tema...	Sim, possuo algum conhecimento sobre o tema...	Sim, possuo algum conhecimento sobre o tema...	Sim, possuo algum conhecimento sobre o tema...	Sim, possuo algum conhecimento sobre o tema...
2020/01/23 7:42:14 PM GMT-3	Entre 26 e 30 anos	Sim! Seria uma honra! :))	Tatu7X	Mestrando	Simmm! Claro!	0	1	0	2	Sim, possuo algum conhecimento sobre o tema...	Sim, possuo algum conhecimento sobre o tema...	Sim, possuo algum conhecimento sobre o tema...	Já ouvi falar, mas não possuo conhecimentos de fato...	Já ouvi falar, mas não possuo conhecimentos de fato...	Sim, possuo algum conhecimento sobre o tema...
2020/01/23 7:42:20 PM GMT-3	Entre 18 e 25 anos	Okay, vamos lá...	Kurama7N	Graduação (a partir do 2º semestre)	Infelizmente, não participarei.	1	2	3	3	Sim, possuo algum conhecimento sobre o tema...	Sim, possuo algum conhecimento sobre o tema...	Sim, possuo algum conhecimento sobre o tema...	Sim, possuo algum conhecimento sobre o tema...	Sim, possuo algum conhecimento sobre o tema...	Sim, possuo algum conhecimento sobre o tema...
2020/01/23 7:51:55 PM GMT-3	Entre 31 e 45 anos	Sim! Seria uma honra! :))	Barbeiro	Doutorando	Simmm! Claro!	3	3	3	3	Sim, possuo algum conhecimento sobre o tema...	Sim, possuo algum conhecimento sobre o tema...	Sim, possuo algum conhecimento sobre o tema...	Sim, possuo algum conhecimento sobre o tema...	Já ouvi falar, mas não possuo conhecimentos de fato...	Sim, possuo conhecimentos avançados no tema.
2020/01/23 7:59:47 PM GMT-3	Entre 31 e 45 anos	Sim! Seria uma honra! :))	Leao1A	Mestrado completo	Infelizmente, não participarei.	2	0	2	2	Sim, possuo algum conhecimento sobre o tema...	Sim, possuo algum conhecimento sobre o tema...	Sim, possuo algum conhecimento sobre o tema...	Sim, possuo algum conhecimento sobre o tema...	Sim, possuo algum conhecimento sobre o tema...	Sim, possuo algum conhecimento sobre o tema...
2020/01/23 8:10:53 PM GMT-3	Entre 18 e 25 anos	Sim! Seria uma honra! :))	Peixe8V	Graduação (a partir do 2º semestre)	Simmm! Claro!	3	1	1	2	Sim, possuo algum conhecimento sobre o tema...	Já ouvi falar, mas não possuo conhecimentos de fato...	Já ouvi falar, mas não possuo conhecimentos de fato...	Sim, possuo algum conhecimento sobre o tema...	Sim, possuo algum conhecimento sobre o tema...	Sim, possuo conhecimentos avançados no tema.
2020/01/23 8:13:55 PM GMT-3	Entre 26 e 30 anos	Sim! Seria uma honra! :))	Suricat4A	Mestrando	Simmm! Claro!	2	4	4	5	Sim, possuo conhecimentos avançados no tema.	Sim, possuo algum conhecimento sobre o tema...	Sim, possuo algum conhecimento sobre o tema...	Já ouvi falar, mas não possuo conhecimentos de fato...	Sim, possuo algum conhecimento sobre o tema...	Sim, possuo conhecimentos avançados no tema.
2020/01/23 8:16:05 PM GMT-3	Entre 18 e 25 anos	Sim! Seria uma honra! :))	Gato7L	Graduação (a partir do 2º semestre)	Simmm! Claro!	0	0	3	3	Sim, possuo algum conhecimento sobre o tema...	Já ouvi falar, mas não possuo conhecimentos de fato...	Já ouvi falar, mas não possuo conhecimentos de fato...	Já ouvi falar, mas não possuo conhecimentos de fato...	Nunca ouvi falar...	Já ouvi falar, mas não possuo conhecimentos de fato...
2020/01/23 8:33:21 PM GMT-3	Entre 31 e 45 anos	Okay, vamos lá...	Tamandua7B	Doutorando	Infelizmente, não participarei.	1	2	1	2	Sim, possuo algum conhecimento sobre o tema...	Sim, possuo algum conhecimento sobre o tema...	Sim, possuo algum conhecimento sobre o tema...	Já ouvi falar, mas não possuo conhecimentos de fato...	Já ouvi falar, mas não possuo conhecimentos de fato...	Sim, possuo conhecimentos avançados no tema.
2020/01/23 8:45:02 PM GMT-3	Entre 18 e 25 anos	Okay, vamos lá...	Coala8S	Graduação (a partir do 2º semestre)	Infelizmente, não participarei.	4	5	2	4	Sim, possuo conhecimentos avançados no tema.	Sim, possuo algum conhecimento sobre o tema...	Sim, possuo algum conhecimento sobre o tema...	Sim, possuo algum conhecimento sobre o tema...	Sim, possuo conhecimentos avançados no tema.	Sim, possuo conhecimentos avançados no tema.
2020/01/23 8:52:26 PM GMT-3	Entre 26 e 30 anos	Sim! Seria uma honra! :))	PeixeB3	Doutorando	Infelizmente, não participarei.	1	1	2	2	Sim, possuo algum conhecimento sobre o tema...	Já ouvi falar, mas não possuo conhecimentos de fato...	Já ouvi falar, mas não possuo conhecimentos de fato...	Já ouvi falar, mas não possuo conhecimentos de fato...	Sim, possuo algum conhecimento sobre o tema...	Sim, possuo conhecimentos avançados no tema.
2020/01/23 9:06:15 PM GMT-3	Entre 26 e 30 anos	Okay, vamos lá...	anom123	Mestrando	Simmm! Claro!	0	0	0	1	Sim, possuo algum conhecimento sobre o tema...	Sim, possuo algum conhecimento sobre o tema...	Sim, possuo algum conhecimento sobre o tema...	Sim, possuo algum conhecimento sobre o tema...	Já ouvi falar, mas não possuo conhecimentos de fato...	Nunca ouvi falar...
2020/01/23 9:37:26 PM GMT-3	Entre 26 e 30 anos	Sim! Seria uma honra! :))	Ratinho4D	Graduação (a partir do 2º semestre)	Simmm! Claro!	1	1	1	1	Já ouvi falar, mas não possuo conhecimentos de fato...	Já ouvi falar, mas não possuo conhecimentos de fato...	Já ouvi falar, mas não possuo conhecimentos de fato...	Já ouvi falar, mas não possuo conhecimentos de fato...	Já ouvi falar, mas não possuo conhecimentos de fato...	Já ouvi falar, mas não possuo conhecimentos de fato...
2020/01/23 9:40:14 PM GMT-3	Entre 18 e 25 anos	Sim! Seria uma honra! :))	Lontra2V	Graduação (a partir do 2º semestre)	Simmm! Claro!	3	1	3	2	Sim, possuo algum conhecimento sobre o tema...	Sim, possuo algum conhecimento sobre o tema...	Sim, possuo algum conhecimento sobre o tema...	Sim, possuo algum conhecimento sobre o tema...	Sim, possuo algum conhecimento sobre o tema...	Sim, possuo algum conhecimento sobre o tema...
2020/01/23 9:40:41 PM GMT-3	Entre 18 e 25 anos	Sim! Seria uma honra! :))	Leão	Graduação (a partir do 2º semestre)	Simmm! Claro!	0	1	1	1	Já ouvi falar, mas não possuo conhecimentos de fato...	Já ouvi falar, mas não possuo conhecimentos de fato...	Já ouvi falar, mas não possuo conhecimentos de fato...	Já ouvi falar, mas não possuo conhecimentos de fato...	Sim, possuo algum conhecimento sobre o tema...	Já ouvi falar, mas não possuo conhecimentos de fato...
2020/01/23 10:12:46 PM GMT-3	Entre 18 e 25 anos	Sim! Seria uma honra! :))	Polvo7B	Graduação (a partir do 2º semestre)	Simmm! Claro!	0	0	0	1	Já ouvi falar, mas não possuo conhecimentos de fato...	Já ouvi falar, mas não possuo conhecimentos de fato...	Já ouvi falar, mas não possuo conhecimentos de fato...	Sim, possuo algum conhecimento sobre o tema...	Nunca ouvi falar...	Nunca ouvi falar...
2020/01/23 11:14:23 PM GMT-3	Entre 26 e 30 anos	Okay, vamos lá...	ornitorrinco7A	Mestrando	Simmm! Claro!	3	5	4	4	Sim, possuo conhecimentos avançados no tema.	Sim, possuo algum conhecimento sobre o tema...	Sim, possuo algum conhecimento sobre o tema...	Sim, possuo algum conhecimento sobre o tema...	Sim, possuo algum conhecimento sobre o tema...	Sim, possuo conhecimentos avançados no tema.
2020/01/23 11:39:01 PM GMT-3	Entre 26 e 30 anos	Sim! Seria uma honra! :))	Blobfish2K	Mestrando	Simmm! Claro!	2	3	1	2	Sim, possuo algum conhecimento sobre o tema...	Sim, possuo algum conhecimento sobre o tema...	Sim, possuo algum conhecimento sobre o tema...	Já ouvi falar, mas não possuo conhecimentos de fato...	Já ouvi falar, mas não possuo conhecimentos de fato...	Sim, possuo algum conhecimento sobre o tema...
2020/01/23 11:41:20 PM GMT-3	Entre 26 e 30 anos	Sim! Seria uma honra! :))	Swordfish3D	Mestrando	Simmm! Claro!	2	1	2	3	Sim, possuo algum conhecimento sobre o tema...	Sim, possuo algum conhecimento sobre o tema...	Sim, possuo algum conhecimento sobre o tema...	Já ouvi falar, mas não possuo conhecimentos de fato...	Já ouvi falar, mas não possuo conhecimentos de fato...	Sim, possuo algum conhecimento sobre o tema...
2020/01/24 12:00:27 AM GMT-3	Entre 18 e 25 anos	Okay, vamos lá...	Guaxinim22A	Mestrado completo	Simmm! Claro!	4	3	1	1	Sim, possuo algum conhecimento sobre o tema...	Sim, possuo conhecimentos avançados no tema.	Já ouvi falar, mas não possuo conhecimentos de fato...	Já ouvi falar, mas não possuo conhecimentos de fato...	Já ouvi falar, mas não possuo conhecimentos de fato...	Nunca ouvi falar...
2020/01/24 12:08:13 AM GMT-3	Entre 18 e 25 anos	Sim! Seria uma honra! :))	Jataí6H	Graduação (a partir do 2º semestre)	Simmm! Claro!	2	0	0	2	Sim, possuo algum conhecimento sobre o tema...	Sim, possuo algum conhecimento sobre o tema...	Já ouvi falar, mas não possuo conhecimentos de fato...	Já ouvi falar, mas não possuo conhecimentos de fato...	Já ouvi falar, mas não possuo conhecimentos de fato...	Sim, possuo algum conhecimento sobre o tema...
2020/01/24 12:46:08 AM GMT-3	Entre 18 e 25 anos	Sim! Seria uma honra! :))	Alpaca5M	Graduação (a partir do 2º semestre)	Simmm! Claro!	3	0	1	2	Sim, possuo algum conhecimento sobre o tema...	Sim, possuo algum conhecimento sobre o tema...	Sim, possuo algum conhecimento sobre o tema...	Sim, possuo algum conhecimento sobre o tema...	Sim, possuo algum conhecimento sobre o tema...	Sim, possuo algum conhecimento sobre o tema...
2020/01/24 1:10:06 AM GMT-3	Entre 18 e 25 anos	Sim! Seria uma honra! :))	AranhaLobo	Graduação (a partir do 2º semestre)	Simmm! Claro!	6	3	3	4	Sim, possuo algum conhecimento sobre o tema...	Sim, possuo algum conhecimento sobre o tema...	Sim, possuo algum conhecimento sobre o tema...	Sim, possuo algum conhecimento sobre o tema...	Já ouvi falar, mas não possuo conhecimentos de fato...	Já ouvi falar, mas não possuo conhecimentos de fato...
2020/01/24 7:06:08 AM GMT-3	Entre 18 e 25 anos	Sim! Seria uma honra! :))	Lontra4D	Graduação (a partir do 2º semestre)	Infelizmente, não participarei.	2	1	0	1	Sim, possuo algum conhecimento sobre o tema...	Sim, possuo conhecimentos avançados no tema.	Já ouvi falar, mas não possuo conhecimentos de fato...	Já ouvi falar, mas não possuo conhecimentos de fato...	Já ouvi falar, mas não possuo conhecimentos de fato...	Sim, possuo algum conhecimento sobre o tema...
2020/01/24 8:23:46 AM GMT-3	Entre 18 e 25 anos	Sim! Seria uma honra! :))	Pepino do mar	Graduação (a partir do 2º semestre)	Simmm! Claro!	1	1	0	1	Já ouvi falar, mas não possuo conhecimentos de fato...	Nunca ouvi falar...	Já ouvi falar, mas não possuo conhecimentos de fato...	Sim, possuo algum conhecimento sobre o tema...	Já ouvi falar, mas não possuo conhecimentos de fato...	Sim, possuo algum conhecimento sobre o tema...
2020/01/24 8:37:59 AM GMT-3	Entre 18 e 25 anos	Okay, vamos lá...	Joaninha6A	Graduação (a partir do 2º semestre)	Simmm! Claro!	2	1	3	3	Sim, possuo algum conhecimento sobre o tema...	Sim, possuo algum conhecimento sobre o tema...	Sim, possuo algum conhecimento sobre o tema...	Sim, possuo algum conhecimento sobre o tema...	Sim, possuo algum conhecimento sobre o tema...	Sim, possuo algum conhecimento sobre o tema...
2020/01/24 9:07:13 AM GMT-3	Entre 18 e 25 anos	Sim! Seria uma honra! :))	Lobo102i	Graduação (a partir do 2º semestre)	Simmm! Claro!	0	0	0	1	Já ouvi falar, mas não possuo conhecimentos de fato...	Já ouvi falar, mas não possuo conhecimentos de fato...	Nunca ouvi falar...	Já ouvi falar, mas não possuo conhecimentos de fato...	Já ouvi falar, mas não possuo conhecimentos de fato...	Sim, possuo algum conhecimento sobre o tema...
2020/01/24 9:39:40 AM GMT-3	Entre 18 e 25 anos	Sim! Seria uma honra! :))	Gato7I	Doutorando	Simmm! Claro!	0	1	1	3	Sim, possuo algum conhecimento sobre o tema...	Sim, possuo algum conhecimento sobre o tema...	Sim, possuo algum conhecimento sobre o tema...	Já ouvi falar, mas não possuo conhecimentos de fato...	Já ouvi falar, mas não possuo conhecimentos de fato...	Já ouvi falar, mas não possuo conhecimentos de fato...
2020/01/24 9:42:23 AM GMT-3	Entre 18 e 25 anos	Sim! Seria uma honra! :))	Abelha12M	Mestrando	Simmm! Claro!	2	0	0	2	Já ouvi falar, mas não possuo conhecimentos de fato...	Já ouvi falar, mas não possuo conhecimentos de fato...	Já ouvi falar, mas não possuo conhecimentos de fato...	Já ouvi falar, mas não possuo conhecimentos de fato...	Já ouvi falar, mas não possuo conhecimentos de fato...	Já ouvi falar, mas não possuo conhecimentos de fato...
2020/01/24 9:42:52 AM GMT-3	Entre 31 e 45 anos	Okay, vamos lá...	BSK	Doutorado completo	Simmm! Claro!	0	0	1	2	Sim, possuo algum conhecimento sobre o tema...	Sim, possuo algum conhecimento sobre o tema...	Sim, possuo algum conhecimento sobre o tema...	Já ouvi falar, mas não possuo conhecimentos de fato...	Já ouvi falar, mas não possuo conhecimentos de fato...	Já ouvi falar, mas não possuo conhecimentos de fato...
2020/01/24 10:04:58 AM GMT-3	Entre 26 e 30 anos	Okay, vamos lá...	ONÇA8J	Doutorando	Simmm! Claro!	2	2	1	2	Já ouvi falar, mas não possuo conhecimentos de fato...	Já ouvi falar, mas não possuo conhecimentos de fato...	Já ouvi falar, mas não possuo conhecimentos de fato...	Já ouvi falar, mas não possuo conhecimentos de fato...	Já ouvi falar, mas não possuo conhecimentos de fato...	Já ouvi falar, mas não possuo conhecimentos de fato...
2020/01/24 10:15:15 AM GMT-3	Entre 26 e 30 anos	Sim! Seria uma honra! :))	Raccon10J	Mestrando	Simmm! Claro!	3	3	0	3	Sim, possuo algum conhecimento sobre o tema...	Já ouvi falar, mas não possuo conhecimentos de fato...	Sim, possuo algum conhecimento sobre o tema...	Sim, possuo algum conhecimento sobre o tema...	Já ouvi falar, mas não possuo conhecimentos de fato...	Já ouvi falar, mas não possuo conhecimentos de fato...
2020/01/24 10:32:59 AM GMT-3	Entre 26 e 30 anos	Sim! Seria uma honra! :))	Plant21	Doutorando	Simmm! Claro!	1	1	1	1	Já ouvi falar, mas não possuo conhecimentos de fato...	Já ouvi falar, mas não possuo conhecimentos de fato...	Já ouvi falar, mas não possuo conhecimentos de fato...	Já ouvi falar, mas não possuo conhecimentos de fato...	Já ouvi falar, mas não possuo conhecimentos de fato...	Sim, possuo algum conhecimento sobre o tema...
2020/01/24 11:26:51 AM GMT-3	Entre 18 e 25 anos	Okay, vamos lá...	Coral5P	Mestrando	Simmm! Claro!	1	2	0	1	Já ouvi falar, mas não possuo conhecimentos de fato...	Já ouvi falar, mas não possuo conhecimentos de fato...	Já ouvi falar, mas não possuo conhecimentos de fato...	Já ouvi falar, mas não possuo conhecimentos de fato...	Sim, possuo algum conhecimento sobre o tema...	Sim, possuo algum conhecimento sobre o tema...
2020/01/24 12:18:31 PM GMT-3	Entre 26 e 30 anos	Okay, vamos lá...	Borboleta08	Doutorando	Infelizmente, não participarei.	4	1	1	4	Sim, possuo algum conhecimento sobre o tema...	Sim, possuo algum conhecimento sobre o tema...	Já ouvi falar, mas não possuo conhecimentos de fato...	Sim, possuo algum conhecimento sobre o tema...	Sim, possuo algum conhecimento sobre o tema...	Sim, possuo algum conhecimento sobre o tema...
2020/01/24 12:55:23 PM GMT-3	Entre 31 e 45 anos	Sim! Seria uma honra! :))	Pombo9R	Mestrado completo	Simmm! Claro!	2	1	0	2	Já ouvi falar, mas não possuo conhecimentos de fato...	Nunca ouvi falar...	Nunca ouvi falar...	Sim, possuo algum conhecimento sobre o tema...	Nunca ouvi falar...	Sim, possuo algum conhecimento sobre o tema...
2020/01/24 1:29:31 PM GMT-3	Entre 18 e 25 anos	Okay, vamos lá...	LeãoA3	Doutorando	Simmm! Claro!	0	0	0	0	Sim, possuo algum conhecimento sobre o tema...	Sim, possuo algum conhecimento sobre o tema...	Sim, possuo algum conhecimento sobre o tema...	Sim, possuo algum conhecimento sobre o tema...	Já ouvi falar, mas não possuo conhecimentos de fato...	Já ouvi falar, mas não possuo conhecimentos de fato...
2020/01/24 1:42:26 PM GMT-3	Entre 18 e 25 anos	Okay, vamos lá...	Cuíca8D	Graduação (a partir do 2º semestre)	Infelizmente, não participarei.	0	1	0	0	Já ouvi falar, mas não possuo conhecimentos de fato...	Já ouvi falar, mas não possuo conhecimentos de fato...	Já ouvi falar, mas não possuo conhecimentos de fato...	Sim, possuo algum conhecimento sobre o tema...	Já ouvi falar, mas não possuo conhecimentos de fato...	Sim, possuo conhecimentos avançados no tema.
2020/01/24 1:47:05 PM GMT-3	Entre 18 e 25 anos	Okay, vamos lá...	Teju3A	Graduação (a partir do 2º semestre)	Simmm! Claro!	1	3	3	4	Sim, possuo algum conhecimento sobre o tema...	Sim, possuo algum conhecimento sobre o tema...	Sim, possuo algum conhecimento sobre o tema...	Sim, possuo algum conhecimento sobre o tema...	Já ouvi falar, mas não possuo conhecimentos de fato...	Já ouvi falar, mas não possuo conhecimentos de fato...
2020/01/24 1:51:31 PM GMT-3	Entre 18 e 25 anos	Sim! Seria uma honra! :))	Coala	Graduação (a partir do 2º semestre)	Simmm! Claro!	0	0	1	2	Sim, possuo algum conhecimento sobre o tema...	Sim, possuo algum conhecimento sobre o tema...	Sim, possuo algum conhecimento sobre o tema...	Sim, possuo algum conhecimento sobre o tema...	Nunca ouvi falar...	Já ouvi falar, mas não possuo conhecimentos de fato...
2020/01/24 1:52:31 PM GMT-3	Entre 18 e 25 anos	Sim! Seria uma honra! :))	Jaguar7F	Graduação (a partir do 2º semestre)	Simmm! Claro!	0	0	4	0	Sim, possuo algum conhecimento sobre o tema...	Sim, possuo algum conhecimento sobre o tema...	Sim, possuo algum conhecimento sobre o tema...	Sim, possuo algum conhecimento sobre o tema...	Já ouvi falar, mas não possuo conhecimentos de fato...	Já ouvi falar, mas não possuo conhecimentos de fato...
2020/01/24 2:01:54 PM GMT-3	Entre 26 e 30 anos	Sim! Seria uma honra! :))	PeixeBoi2D	Mestrando	Simmm! Claro!	2	0	1	3	Sim, possuo algum conhecimento sobre o tema...	Sim, possuo algum conhecimento sobre o tema...	Sim, possuo algum conhecimento sobre o tema...	Sim, possuo algum conhecimento sobre o tema...	Sim, possuo algum conhecimento sobre o tema...	Sim, possuo algum conhecimento sobre o tema...
2020/01/24 2:21:31 PM GMT-3	Entre 46 e 59 anos	Sim! Seria uma honra! :))	Lucscar2020	Graduação (a partir do 2º semestre)	Simmm! Claro!	5	5	2	3	Sim, possuo algum conhecimento sobre o tema...	Já ouvi falar, mas não possuo conhecimentos de fato...	Sim, possuo algum conhecimento sobre o tema...	Já ouvi falar, mas não possuo conhecimentos de fato...	Já ouvi falar, mas não possuo conhecimentos de fato...	Sim, possuo algum conhecimento sobre o tema...
2020/01/24 2:32:11 PM GMT-3	Entre 26 e 30 anos	Sim! Seria uma honra! :))	Lobo-guará4D	Graduação (calouro)	Simmm! Claro!	2	0	0	0	Nunca ouvi falar...	Nunca ouvi falar...	Nunca ouvi falar...	Já ouvi falar, mas não possuo conhecimentos de fato...	Nunca ouvi falar...	Já ouvi falar, mas não possuo conhecimentos de fato...
2020/01/24 2:46:32 PM GMT-3	Entre 18 e 25 anos	Sim! Seria uma honra! :))	jacaré5F	Graduação (a partir do 2º semestre)	Simmm! Claro!	1	0	0	2	Sim, possuo algum conhecimento sobre o tema...	Já ouvi falar, mas não possuo conhecimentos de fato...	Já ouvi falar, mas não possuo conhecimentos de fato...	Já ouvi falar, mas não possuo conhecimentos de fato...	Nunca ouvi falar...	Sim, possuo algum conhecimento sobre o tema...
2020/01/24 3:29:17 PM GMT-3	Entre 18 e 25 anos	Okay, vamos lá...	Coala6P	Mestrando	Simmm! Claro!	2	0	2	3	Já ouvi falar, mas não possuo conhecimentos de fato...	Já ouvi falar, mas não possuo conhecimentos de fato...	Já ouvi falar, mas não possuo conhecimentos de fato...	Já ouvi falar, mas não possuo conhecimentos de fato...	Já ouvi falar, mas não possuo conhecimentos de fato...	Nunca ouvi falar...
2020/01/24 3:50:45 PM GMT-3	Entre 26 e 30 anos	Okay, vamos lá...	Mafagafinho7M	Mestrando	Simmm! Claro!	1	1	1	1	Sim, possuo algum conhecimento sobre o tema...	Sim, possuo algum conhecimento sobre o tema...	Já ouvi falar, mas não possuo conhecimentos de fato...	Sim, possuo algum conhecimento sobre o tema...	Já ouvi falar, mas não possuo conhecimentos de fato...	Sim, possuo algum conhecimento sobre o tema...
2020/01/24 3:51:37 PM GMT-3	Entre 18 e 25 anos	Sim! Seria uma honra! :))	tigrão14c	Graduação (a partir do 2º semestre)	Infelizmente, não participarei.	0	1	0	1	Nunca ouvi falar...	Nunca ouvi falar...	Nunca ouvi falar...	Nunca ouvi falar...	Nunca ouvi falar...	Nunca ouvi falar...
2020/01/24 5:20:24 PM GMT-3	Entre 18 e 25 anos	Sim! Seria uma honra! :))	RaposinhaA1	Mestrando	Infelizmente, não participarei.	1	1	2	1	Sim, possuo algum conhecimento sobre o tema...	Sim, possuo algum conhecimento sobre o tema...	Já ouvi falar, mas não possuo conhecimentos de fato...	Sim, possuo algum conhecimento sobre o tema...	Já ouvi falar, mas não possuo conhecimentos de fato...	Já ouvi falar, mas não possuo conhecimentos de fato...
2020/01/24 6:12:25 PM GMT-3	Entre 31 e 45 anos	Sim! Seria uma honra! :))	LULA13	Pós-doutorando	Simmm! Claro!	0	0	0	1	Já ouvi falar, mas não possuo conhecimentos de fato...	Já ouvi falar, mas não possuo conhecimentos de fato...	Já ouvi falar, mas não possuo conhecimentos de fato...	Nunca ouvi falar...	Já ouvi falar, mas não possuo conhecimentos de fato...	Nunca ouvi falar...
2020/01/24 6:41:58 PM GMT-3	Entre 18 e 25 anos	Sim! Seria uma honra! :))	Pinguim5D	Graduação (a partir do 2º semestre)	Simmm! Claro!	1	1	3	2	Sim, possuo algum conhecimento sobre o tema...	Sim, possuo algum conhecimento sobre o tema...	Sim, possuo algum conhecimento sobre o tema...	Já ouvi falar, mas não possuo conhecimentos de fato...	Já ouvi falar, mas não possuo conhecimentos de fato...	Sim, possuo algum conhecimento sobre o tema...
2020/01/24 9:03:05 PM GMT-3	Entre 26 e 30 anos	Okay, vamos lá...	Tubarão01	Mestrando	Infelizmente, não participarei.	2	2	1	3	Sim, possuo algum conhecimento sobre o tema...	Já ouvi falar, mas não possuo conhecimentos de fato...	Sim, possuo algum conhecimento sobre o tema...	Sim, possuo algum conhecimento sobre o tema...	Já ouvi falar, mas não possuo conhecimentos de fato...	Já ouvi falar, mas não possuo conhecimentos de fato...
2020/01/24 9:21:57 PM GMT-3	Entre 18 e 25 anos	Okay, vamos lá...	Leão1P	Graduação (a partir do 2º semestre)	Simmm! Claro!	2	2	3	3	Sim, possuo algum conhecimento sobre o tema...	Sim, possuo algum conhecimento sobre o tema...	Sim, possuo algum conhecimento sobre o tema...	Sim, possuo conhecimentos avançados no tema.	Sim, possuo algum conhecimento sobre o tema...	Já ouvi falar, mas não possuo conhecimentos de fato...
2020/01/24 10:22:40 PM GMT-3	Entre 18 e 25 anos	Sim! Seria uma honra! :))	Pangolim2106	Graduação (a partir do 2º semestre)	Simmm! Claro!	0	0	0	1	Já ouvi falar, mas não possuo conhecimentos de fato...	Nunca ouvi falar...	Nunca ouvi falar...	Já ouvi falar, mas não possuo conhecimentos de fato...	Nunca ouvi falar...	Nunca ouvi falar...
2020/01/24 10:35:47 PM GMT-3	Entre 18 e 25 anos	Okay, vamos lá...	Camaleão7G	Graduação (a partir do 2º semestre)	Infelizmente, não participarei.	6	6	0	0	Nunca ouvi falar...	Nunca ouvi falar...	Nunca ouvi falar...	Nunca ouvi falar...	Nunca ouvi falar...	Já ouvi falar, mas não possuo conhecimentos de fato...
2020/01/25 12:17:57 AM GMT-3	Entre 18 e 25 anos	Sim! Seria uma honra! :))	Arara3Q	Doutorando	Simmm! Claro!	1	0	0	0	Já ouvi falar, mas não possuo conhecimentos de fato...	Já ouvi falar, mas não possuo conhecimentos de fato...	Já ouvi falar, mas não possuo conhecimentos de fato...	Já ouvi falar, mas não possuo conhecimentos de fato...	Já ouvi falar, mas não possuo conhecimentos de fato...	Já ouvi falar, mas não possuo conhecimentos de fato...
2020/01/25 4:07:00 AM GMT-3	Entre 26 e 30 anos	Sim! Seria uma honra! :))	Águia8R	Doutorando	Simmm! Claro!	3	1	1	3	Sim, possuo algum conhecimento sobre o tema...	Sim, possuo algum conhecimento sobre o tema...	Sim, possuo conhecimentos avançados no tema.	Sim, possuo algum conhecimento sobre o tema...	Sim, possuo algum conhecimento sobre o tema...	Sim, possuo algum conhecimento sobre o tema...
2020/01/25 8:00:29 AM GMT-3	Entre 18 e 25 anos	Sim! Seria uma honra! :))	Onça95	Graduação (a partir do 2º semestre)	Infelizmente, não participarei.	5	3	6	6	Sim, possuo algum conhecimento sobre o tema...	Sim, possuo conhecimentos avançados no tema.	Já ouvi falar, mas não possuo conhecimentos de fato...	Nunca ouvi falar...	Nunca ouvi falar...	Sim, possuo conhecimentos avançados no tema.
2020/01/25 9:15:10 AM GMT-3	Entre 26 e 30 anos	Okay, vamos lá...	Ornitorrinco9V	Doutorando	Infelizmente, não participarei.	1	1	1	1	Sim, possuo algum conhecimento sobre o tema...	Sim, possuo algum conhecimento sobre o tema...	Sim, possuo algum conhecimento sobre o tema...	Sim, possuo algum conhecimento sobre o tema...	Já ouvi falar, mas não possuo conhecimentos de fato...	Já ouvi falar, mas não possuo conhecimentos de fato...
2020/01/25 10:08:42 AM GMT-3	Entre 18 e 25 anos	Sim! Seria uma honra! :))	Gato2K	Doutorando	Infelizmente, não participarei.	1	2	1	3	Sim, possuo algum conhecimento sobre o tema...	Sim, possuo algum conhecimento sobre o tema...	Sim, possuo algum conhecimento sobre o tema...	Já ouvi falar, mas não possuo conhecimentos de fato...	Já ouvi falar, mas não possuo conhecimentos de fato...	Já ouvi falar, mas não possuo conhecimentos de fato...
2020/01/25 11:05:55 AM GMT-3	Entre 18 e 25 anos	Não, obrigado. rsrs	Suricato3D	Graduação (a partir do 2º semestre)	Simmm! Claro!	1	2	1	4	Sim, possuo conhecimentos avançados no tema.	Sim, possuo algum conhecimento sobre o tema...	Sim, possuo conhecimentos avançados no tema.	Sim, possuo conhecimentos avançados no tema.	Sim, possuo algum conhecimento sobre o tema...	Sim, possuo conhecimentos avançados no tema.
2020/01/25 11:47:18 AM GMT-3	Entre 31 e 45 anos	Sim! Seria uma honra! :))	Fran	Doutorado completo	Simmm! Claro!	0	0	1	0	Já ouvi falar, mas não possuo conhecimentos de fato...	Já ouvi falar, mas não possuo conhecimentos de fato...	Já ouvi falar, mas não possuo conhecimentos de fato...	Nunca ouvi falar...	Já ouvi falar, mas não possuo conhecimentos de fato...	Já ouvi falar, mas não possuo conhecimentos de fato...
2020/01/25 1:35:02 PM GMT-3	Entre 18 e 25 anos	Sim! Seria uma honra! :))	Peixe42	Graduação (a partir do 2º semestre)	Simmm! Claro!	4	4	4	4	Sim, possuo algum conhecimento sobre o tema...	Sim, possuo algum conhecimento sobre o tema...	Sim, possuo algum conhecimento sobre o tema...	Sim, possuo algum conhecimento sobre o tema...	Sim, possuo algum conhecimento sobre o tema...	Sim, possuo algum conhecimento sobre o tema...
2020/01/25 2:02:29 PM GMT-3	Entre 18 e 25 anos	Sim! Seria uma honra! :))	JAGUAR5H	Graduação (a partir do 2º semestre)	Simmm! Claro!	2	1	2	3	Já ouvi falar, mas não possuo conhecimentos de fato...	Nunca ouvi falar...	Já ouvi falar, mas não possuo conhecimentos de fato...	Sim, possuo algum conhecimento sobre o tema...	Já ouvi falar, mas não possuo conhecimentos de fato...	Já ouvi falar, mas não possuo conhecimentos de fato...
2020/01/25 6:15:04 PM GMT-3	Entre 31 e 45 anos	Okay, vamos lá...	Jaguar26P	Doutorando	Simmm! Claro!	1	1	0	1	Sim, possuo algum conhecimento sobre o tema...	Sim, possuo algum conhecimento sobre o tema...	Já ouvi falar, mas não possuo conhecimentos de fato...	Já ouvi falar, mas não possuo conhecimentos de fato...	Sim, possuo algum conhecimento sobre o tema...	Já ouvi falar, mas não possuo conhecimentos de fato...
2020/01/26 12:22:36 AM GMT-3	Entre 18 e 25 anos	Sim! Seria uma honra! :))	Tordo6A	Graduação (a partir do 2º semestre)	Infelizmente, não participarei.	0	0	0	0	Já ouvi falar, mas não possuo conhecimentos de fato...	Já ouvi falar, mas não possuo conhecimentos de fato...	Já ouvi falar, mas não possuo conhecimentos de fato...	Já ouvi falar, mas não possuo conhecimentos de fato...	Já ouvi falar, mas não possuo conhecimentos de fato...	Já ouvi falar, mas não possuo conhecimentos de fato...
2020/01/26 10:09:33 AM GMT-3	Entre 18 e 25 anos	Sim! Seria uma honra! :))	Leao7L	Graduação (a partir do 2º semestre)	Simmm! Claro!	0	0	0	0	Já ouvi falar, mas não possuo conhecimentos de fato...	Já ouvi falar, mas não possuo conhecimentos de fato...	Já ouvi falar, mas não possuo conhecimentos de fato...	Sim, possuo algum conhecimento sobre o tema...	Já ouvi falar, mas não possuo conhecimentos de fato...	Sim, possuo algum conhecimento sobre o tema...
2020/01/26 12:03:18 PM GMT-3	Entre 18 e 25 anos	Sim! Seria uma honra! :))	Coruja1X	Graduação (a partir do 2º semestre)	Simmm! Claro!	1	0	0	2	Sim, possuo algum conhecimento sobre o tema...	Já ouvi falar, mas não possuo conhecimentos de fato...	Já ouvi falar, mas não possuo conhecimentos de fato...	Sim, possuo algum conhecimento sobre o tema...	Sim, possuo algum conhecimento sobre o tema...	Sim, possuo algum conhecimento sobre o tema...
2020/01/26 2:10:34 PM GMT-3	Entre 31 e 45 anos	Okay, vamos lá...	Gato1A	Mestrando	Simmm! Claro!	0	0	1	1	Já ouvi falar, mas não possuo conhecimentos de fato...	Já ouvi falar, mas não possuo conhecimentos de fato...	Já ouvi falar, mas não possuo conhecimentos de fato...	Já ouvi falar, mas não possuo conhecimentos de fato...	Já ouvi falar, mas não possuo conhecimentos de fato...	Sim, possuo algum conhecimento sobre o tema...
2020/01/26 3:52:02 PM GMT-3	Entre 18 e 25 anos	Sim! Seria uma honra! :))	Lobo7C	Graduação (a partir do 2º semestre)	Simmm! Claro!	2	0	2	1	Sim, possuo algum conhecimento sobre o tema...	Sim, possuo algum conhecimento sobre o tema...	Sim, possuo algum conhecimento sobre o tema...	Já ouvi falar, mas não possuo conhecimentos de fato...	Já ouvi falar, mas não possuo conhecimentos de fato...	Já ouvi falar, mas não possuo conhecimentos de fato...
2020/01/26 7:06:45 PM GMT-3	Entre 18 e 25 anos	Sim! Seria uma honra! :))	Axolote2O	Mestrando	Infelizmente, não participarei.	6	6	1	2	Sim, possuo algum conhecimento sobre o tema...	Já ouvi falar, mas não possuo conhecimentos de fato...	Sim, possuo algum conhecimento sobre o tema...	Já ouvi falar, mas não possuo conhecimentos de fato...	Já ouvi falar, mas não possuo conhecimentos de fato...	Já ouvi falar, mas não possuo conhecimentos de fato...
2020/01/26 8:34:55 PM GMT-3	Entre 26 e 30 anos	Sim! Seria uma honra! :))	Tartaruga3M	Doutorando	Simmm! Claro!	2	3	0	3	Sim, possuo algum conhecimento sobre o tema...	Já ouvi falar, mas não possuo conhecimentos de fato...	Já ouvi falar, mas não possuo conhecimentos de fato...	Já ouvi falar, mas não possuo conhecimentos de fato...	Sim, possuo algum conhecimento sobre o tema...	Sim, possuo algum conhecimento sobre o tema...
2020/01/26 8:46:42 PM GMT-3	Entre 26 e 30 anos	Sim! Seria uma honra! :))	Panda5S	Doutorando	Simmm! Claro!	1	1	2	2	Sim, possuo algum conhecimento sobre o tema...	Já ouvi falar, mas não possuo conhecimentos de fato...	Já ouvi falar, mas não possuo conhecimentos de fato...	Já ouvi falar, mas não possuo conhecimentos de fato...	Sim, possuo algum conhecimento sobre o tema...	Sim, possuo algum conhecimento sobre o tema...
2020/01/26 9:22:48 PM GMT-3	Entre 18 e 25 anos	Sim! Seria uma honra! :))	Lobo6Y	Graduação (a partir do 2º semestre)	Simmm! Claro!	1	0	2	2	Sim, possuo algum conhecimento sobre o tema...	Sim, possuo algum conhecimento sobre o tema...	Sim, possuo algum conhecimento sobre o tema...	Sim, possuo algum conhecimento sobre o tema...	Sim, possuo algum conhecimento sobre o tema...	Sim, possuo algum conhecimento sobre o tema...
2020/01/26 9:45:29 PM GMT-3	Entre 26 e 30 anos	Sim! Seria uma honra! :))	Açai_mg	Graduação (a partir do 2º semestre)	Simmm! Claro!	2	1	2	3	Sim, possuo algum conhecimento sobre o tema...	Sim, possuo algum conhecimento sobre o tema...	Já ouvi falar, mas não possuo conhecimentos de fato...	Sim, possuo algum conhecimento sobre o tema...	Já ouvi falar, mas não possuo conhecimentos de fato...	Sim, possuo algum conhecimento sobre o tema...
2020/01/26 10:29:28 PM GMT-3	Entre 18 e 25 anos	Sim! Seria uma honra! :))	Leão7V	Graduação (a partir do 2º semestre)	Simmm! Claro!	2	1	3	3	Já ouvi falar, mas não possuo conhecimentos de fato...	Já ouvi falar, mas não possuo conhecimentos de fato...	Já ouvi falar, mas não possuo conhecimentos de fato...	Sim, possuo algum conhecimento sobre o tema...	Já ouvi falar, mas não possuo conhecimentos de fato...	Sim, possuo algum conhecimento sobre o tema...
2020/01/26 11:16:03 PM GMT-3	Entre 18 e 25 anos	Sim! Seria uma honra! :))	Buriti666	Graduação (a partir do 2º semestre)	Simmm! Claro!	1	1	0	1	Já ouvi falar, mas não possuo conhecimentos de fato...	Já ouvi falar, mas não possuo conhecimentos de fato...	Já ouvi falar, mas não possuo conhecimentos de fato...	Já ouvi falar, mas não possuo conhecimentos de fato...	Já ouvi falar, mas não possuo conhecimentos de fato...	Já ouvi falar, mas não possuo conhecimentos de fato...
2020/01/26 11:43:50 PM GMT-3	Entre 18 e 25 anos	Sim! Seria uma honra! :))	Pinguim6L	Graduação (a partir do 2º semestre)	Infelizmente, não participarei.	0	0	0	0	Já ouvi falar, mas não possuo conhecimentos de fato...	Já ouvi falar, mas não possuo conhecimentos de fato...	Já ouvi falar, mas não possuo conhecimentos de fato...	Já ouvi falar, mas não possuo conhecimentos de fato...	Nunca ouvi falar...	Sim, possuo algum conhecimento sobre o tema...
2020/01/27 1:35:58 AM GMT-3	Entre 18 e 25 anos	Okay, vamos lá...	AnaConda2D	Doutorando	Simmm! Claro!	1	0	2	3	Já ouvi falar, mas não possuo conhecimentos de fato...	Já ouvi falar, mas não possuo conhecimentos de fato...	Já ouvi falar, mas não possuo conhecimentos de fato...	Já ouvi falar, mas não possuo conhecimentos de fato...	Já ouvi falar, mas não possuo conhecimentos de fato...	Sim, possuo algum conhecimento sobre o tema...
2020/01/27 4:47:04 AM GMT-3	Entre 31 e 45 anos	Sim! Seria uma honra! :))	Macaco7X	Mestrando	Simmm! Claro!	4	4	2	3	Sim, possuo algum conhecimento sobre o tema...	Sim, possuo algum conhecimento sobre o tema...	Sim, possuo algum conhecimento sobre o tema...	Sim, possuo algum conhecimento sobre o tema...	Sim, possuo algum conhecimento sobre o tema...	Sim, possuo algum conhecimento sobre o tema...
2020/01/27 6:58:44 AM GMT-3	Entre 18 e 25 anos	Okay, vamos lá...	Cachorro3C	Graduação (a partir do 2º semestre)	Simmm! Claro!	3	0	3	3	Nunca ouvi falar...	Nunca ouvi falar...	Nunca ouvi falar...	Já ouvi falar, mas não possuo conhecimentos de fato...	Nunca ouvi falar...	Já ouvi falar, mas não possuo conhecimentos de fato...
2020/01/27 7:16:01 AM GMT-3	Entre 18 e 25 anos	Não, obrigado. rsrs	Leopardo7J	Graduação (a partir do 2º semestre)	Simmm! Claro!	0	0	1	3	Sim, possuo algum conhecimento sobre o tema...	Sim, possuo algum conhecimento sobre o tema...	Sim, possuo algum conhecimento sobre o tema...	Já ouvi falar, mas não possuo conhecimentos de fato...	Já ouvi falar, mas não possuo conhecimentos de fato...	Já ouvi falar, mas não possuo conhecimentos de fato...
2020/01/27 8:18:01 AM GMT-3	Entre 26 e 30 anos	Sim! Seria uma honra! :))	Tamandua3D	Mestrado completo	Simmm! Claro!	3	2	1	1	Sim, possuo algum conhecimento sobre o tema...	Já ouvi falar, mas não possuo conhecimentos de fato...	Já ouvi falar, mas não possuo conhecimentos de fato...	Já ouvi falar, mas não possuo conhecimentos de fato...	Nunca ouvi falar...	Sim, possuo conhecimentos avançados no tema.
2020/01/27 8:20:11 AM GMT-3	Entre 26 e 30 anos	Sim! Seria uma honra! :))	Lobo7D	Mestrando	Simmm! Claro!	2	1	1	2	Sim, possuo algum conhecimento sobre o tema...	Já ouvi falar, mas não possuo conhecimentos de fato...	Já ouvi falar, mas não possuo conhecimentos de fato...	Já ouvi falar, mas não possuo conhecimentos de fato...	Nunca ouvi falar...	Sim, possuo algum conhecimento sobre o tema...
2020/01/27 8:59:18 AM GMT-3	Entre 31 e 45 anos	Okay, vamos lá...	cactus13L	Doutorando	Simmm! Claro!	1	0	1	0	Sim, possuo algum conhecimento sobre o tema...	Já ouvi falar, mas não possuo conhecimentos de fato...	Já ouvi falar, mas não possuo conhecimentos de fato...	Já ouvi falar, mas não possuo conhecimentos de fato...	Já ouvi falar, mas não possuo conhecimentos de fato...	Sim, possuo conhecimentos avançados no tema.
2020/01/29 11:58:08 PM GMT-3	Entre 18 e 25 anos	Sim! Seria uma honra! :))	ADayDreamer	Graduação (a partir do 2º semestre)	Infelizmente, não participarei.	3	1	0	3	Sim, possuo algum conhecimento sobre o tema...	Já ouvi falar, mas não possuo conhecimentos de fato...	Já ouvi falar, mas não possuo conhecimentos de fato...	Sim, possuo algum conhecimento sobre o tema...	Nunca ouvi falar...	Já ouvi falar, mas não possuo conhecimentos de fato...
